# Supplementary material for: Fine scale population structure of Acropora palmata and Acropora cervicornis in the Colombian Caribbean
Source: PeerJ journal article supplement (doi:10.7717/peerj.13854), 2022-08-30

Posterior probability of group membership

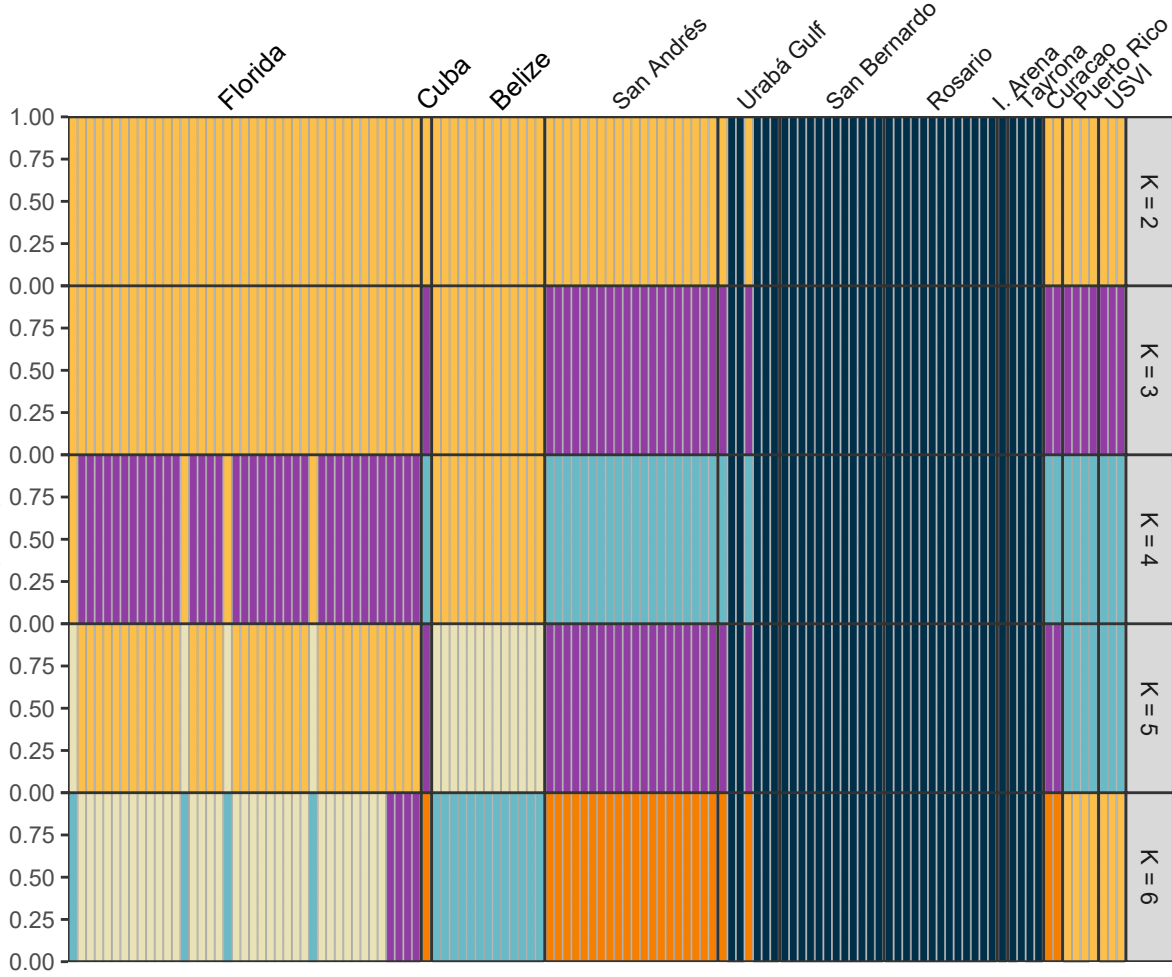

Supplement: Figure_S4.pdf [file Figure_S4.pdf]
