# Supplementary material for: Fine scale population structure of Acropora palmata and Acropora cervicornis in the Colombian Caribbean
Source: PubMed Central journal article supplement (PMC9438773; doi:10.7717/peerj.13854), 2022-08-30

**A**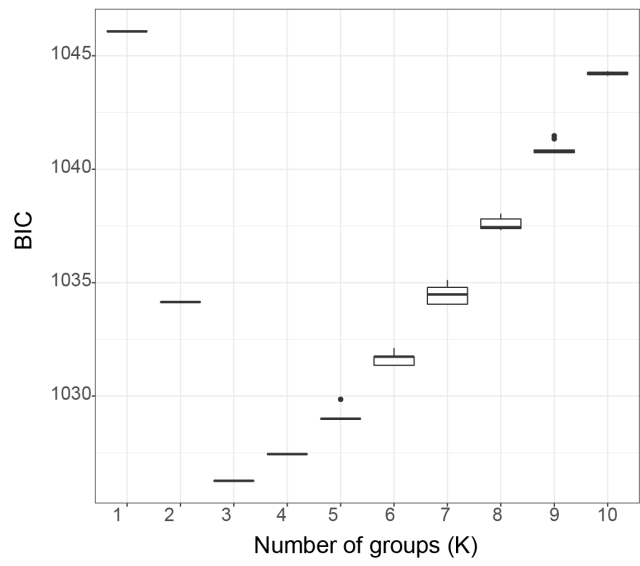**B**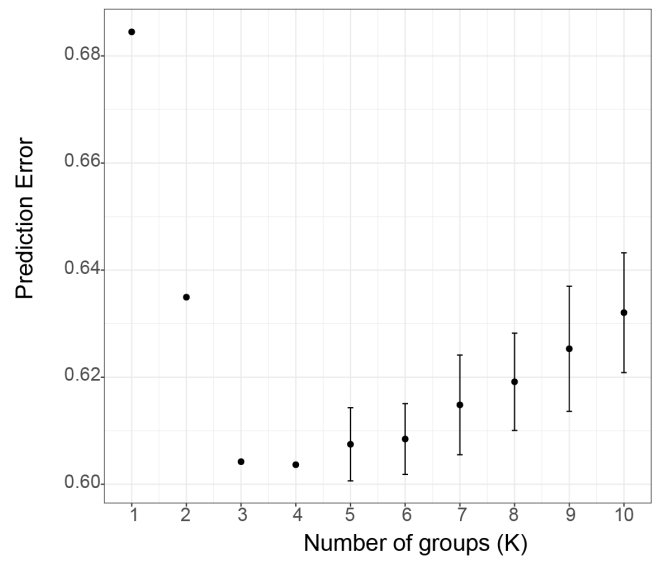

Supplement: peerj-10-13854-s006.pdf [file peerj-10-13854-s006.pdf]
