# Supplementary material for: Fine scale population structure of Acropora palmata and Acropora cervicornis in the Colombian Caribbean
Source: PubMed Central journal article supplement (PMC9438773; doi:10.7717/peerj.13854), 2022-08-30
Supplement: peerj-10-13854-s010.pdf [file peerj-10-13854-s010.pdf]

| Affy ID                            | Sample ID | Genetic Species | Region       | Latitude | Longitude | Reef         | Multi-Locus C | This Study |
|------------------------------------|-----------|-----------------|--------------|----------|-----------|--------------|---------------|------------|
| a550962-4383627-121220-367_K21.CEL | RG Ac43   | A. cervicornis  | San Bernardo | 9,80244  | -75,81946 | La Pared     | HG0173        | VERDADERO  |
| a550962-4383627-121220-367_M11.CEL | RG Ac57   | A. prolifera    | Capurganá    | 8,67194  | -77,35722 | Cabo Tiburon | HG0176        | VERDADERO  |
| a550962-4383627-121220-367_A01.CEL | RG Ap1    | A. palmata      | Tayrona      | 11,32222 | -74,16666 | Concha       | HG0168        | VERDADERO  |
| a550962-4368120-060520-251_A07.CEL | RG Ap10   | A. palmata      | Tayrona      | 11,32    | -74,20083 | I. Aguja     | HG0238        | VERDADERO  |
| a550962-4383627-121220-367_A15.CEL | RG Ap14   | A. palmata      | Tayrona      | 11,31749 | -74,13393 | Chengue      | HG0239        | VERDADERO  |
| a550962-4383627-121220-367_A17.CEL | RG Ap15   | A. palmata      | Tayrona      | 11,31749 | -74,13393 | Chengue      | HG0138        | VERDADERO  |
| a550962-4368120-060520-251_A13.CEL | RG Ap17   | A. palmata      | Tayrona      | 11,31749 | -74,13393 | Chengue      | HG0234        | VERDADERO  |
| a550962-4368120-060520-251_A15.CEL | RG Ap18   | A. palmata      | Tayrona      | 11,31749 | -74,13393 | Chengue      | HG0234        | VERDADERO  |
| a550962-4368120-060520-251_A17.CEL | RG Ap19   | A. palmata      | Tayrona      | 11,32319 | -74,11334 | Gayraca      | HG0161        | VERDADERO  |
| a550962-4383627-121220-367_A21.CEL | RG Ap20   | A. palmata      | Tayrona      | 11,32319 | -74,11334 | Gayraca      | HG0147        | VERDADERO  |
| a550962-4368120-060520-251_A19.CEL | RG Ap21   | A. palmata      | Tayrona      | 11,32319 | -74,11334 | Gayraca      | HG0220        | VERDADERO  |
| a550962-4383627-121220-367_A23.CEL | RG Ap22   | A. palmata      | Tayrona      | 11,32319 | -74,11334 | Gayraca      | HG0162        | VERDADERO  |
| a550962-4368120-060520-251_A21.CEL | RG Ap25   | A. palmata      | Tayrona      | 11,33172 | -74,05947 | Cinto        | HG0152        | VERDADERO  |
| a550962-4383627-121220-367_C07.CEL | RG Ap28   | A. palmata      | Tayrona      | 11,3108  | -74,19032 | Aguja        | HG0246        | VERDADERO  |
| a550962-4383627-121220-367_C09.CEL | RG Ap29   | A. palmata      | Tayrona      | 11,3108  | -74,19032 | Aguja        | HG0171        | VERDADERO  |
| a550962-4383627-121220-367_A03.CEL | RG Ap3    | A. palmata      | Tayrona      | 11,32222 | -74,16666 | Concha       | HG0242        | VERDADERO  |
| a550962-4383627-121220-367_C11.CEL | RG Ap30   | A. palmata      | Tayrona      | 11,3108  | -74,19032 | Aguja        | HG0261        | VERDADERO  |
| a550962-4368120-060520-251_C01.CEL | RG Ap31   | A. palmata      | Tayrona      | 11,3108  | -74,19032 | Aguja        | HG0248        | VERDADERO  |
| a550962-4368120-060520-251_C03.CEL | RG Ap32   | A. palmata      | Tayrona      | 11,3108  | -74,19032 | Aguja        | HG0151        | VERDADERO  |
| a550962-4383627-121220-367_C13.CEL | RG Ap33   | A. palmata      | Cartagena    | 10,185   | -75,74556 | Punta Brava  | HG0237        | VERDADERO  |
| a550962-4383627-121220-367_C15.CEL | RG Ap34   | A. palmata      | Cartagena    | 10,185   | -75,74556 | Punta Brava  | HG0235        | VERDADERO  |
| a550962-4368120-060520-251_C05.CEL | RG Ap35   | A. palmata      | Cartagena    | 10,185   | -75,74556 | Punta Brava  | HG0172        | VERDADERO  |
| a550962-4383627-121220-367_C17.CEL | RG Ap36   | A. palmata      | Rosario      | 10,18553 | -75,7279  | I. Fiesta    | HG0219        | VERDADERO  |
| a550962-4368120-060520-251_C07.CEL | RG Ap37   | A. palmata      | Rosario      | 10,18553 | -75,7279  | I. Fiesta    | HG0153        | VERDADERO  |
| a550962-4383627-121220-367_C19.CEL | RG Ap38   | A. palmata      | Rosario      | 10,18553 | -75,7279  | I. Fiesta    | HG0197        | VERDADERO  |
| a550962-4368120-060520-251_C09.CEL | RG Ap39   | A. palmata      | Rosario      | 10,18553 | -75,7279  | I. Fiesta    | HG0153        | VERDADERO  |
| a550962-4383627-121220-367_A05.CEL | RG Ap4    | A. palmata      | Tayrona      | 11,32222 | -74,16666 | Concha       | HG0221        | VERDADERO  |
| a550962-4383627-121220-367_C21.CEL | RG Ap40   | A. palmata      | Rosario      | 10,16262 | -75,79881 | Rosario      | HG0254        | VERDADERO  |
| a550962-4368120-060520-251_C11.CEL | RG Ap41   | A. palmata      | Rosario      | 10,16262 | -75,79881 | Rosario      | HG0137        | VERDADERO  |
| a550962-4383627-121220-367_C23.CEL | RG Ap42   | A. palmata      | San Bernardo | 9,7613   | -75,87303 | Maravilla    | HG0192        | VERDADERO  |
| a550962-4368120-060520-251_C13.CEL | RG Ap43   | A. palmata      | San Bernardo | 9,7613   | -75,87303 | Maravilla    | HG0214        | VERDADERO  |
| a550962-4368120-060520-251_C15.CEL | RG Ap44   | A. palmata      | San Bernardo | 9,7613   | -75,87303 | Maravilla    | HG0232        | VERDADERO  |
| a550962-4383627-121220-367_E03.CEL | RG Ap46   | A. palmata      | San Bernardo | 9,81472  | -75,85583 | Bajo Hojuela | HG0211        | VERDADERO  |
| a550962-4368120-060520-251_C17.CEL | RG Ap47   | A. palmata      | San Bernardo | 9,81472  | -75,85583 | Bajo Hojuela | HG0263        | VERDADERO  |
| a550962-4368120-060520-251_C19.CEL | RG Ap48   | A. palmata      | San Bernardo | 9,81472  | -75,85583 | Bajo Hojuela | HG0211        | VERDADERO  |

|                                    |         |            |              |          |           |              |        |           |
|------------------------------------|---------|------------|--------------|----------|-----------|--------------|--------|-----------|
| a550962-4383627-121220-367_E05.CEL | RG Ap49 | A. palmata | San Bernardo | 9,81472  | -75,85583 | Bajo Hojuela | HG0154 | VERDADERO |
| a550962-4368120-060520-251_A03.CEL | RG Ap5  | A. palmata | Tayrona      | 11,32222 | -74,16666 | Concha       | HG0241 | VERDADERO |
| a550962-4383627-121220-367_E07.CEL | RG Ap50 | A. palmata | San Bernardo | 9,81472  | -75,85583 | Bajo Hojuela | HG0211 | VERDADERO |
| a550962-4383627-121220-367_E09.CEL | RG Ap51 | A. palmata | San Bernardo | 9,81472  | -75,85583 | Bajo Hojuela | HG0211 | VERDADERO |
| a550962-4383627-121220-367_E11.CEL | RG Ap52 | A. palmata | San Bernardo | 9,81472  | -75,85583 | Bajo Hojuela | HG0154 | VERDADERO |
| a550962-4368120-060520-251_C21.CEL | RG Ap53 | A. palmata | San Bernardo | 9,81472  | -75,85583 | Bajo Hojuela | HG0154 | VERDADERO |
| a550962-4368120-060520-251_C23.CEL | RG Ap54 | A. palmata | San Bernardo | 9,81472  | -75,85583 | Bajo Hojuela | HG0263 | VERDADERO |
| a550962-4383627-121220-367_E13.CEL | RG Ap55 | A. palmata | San Bernardo | 9,81472  | -75,85583 | Bajo Hojuela | HG0211 | VERDADERO |
| a550962-4368120-060520-251_E01.CEL | RG Ap57 | A. palmata | San Bernardo | 9,76111  | -75,87277 | Maravilla    | HG0167 | VERDADERO |
| a550962-4368120-060520-251_E03.CEL | RG Ap58 | A. palmata | San Bernardo | 9,76111  | -75,87277 | Maravilla    | HG0167 | VERDADERO |
| a550962-4383627-121220-367_E17.CEL | RG Ap59 | A. palmata | San Bernardo | 9,76111  | -75,87277 | Maravilla    | HG0262 | VERDADERO |
| a550962-4368120-060520-251_A05.CEL | RG Ap6  | A. palmata | Tayrona      | 11,32    | -74,20083 | I. Aguja     | HG0231 | VERDADERO |
| a550962-4383627-121220-367_E19.CEL | RG Ap60 | A. palmata | San Bernardo | 9,70666  | -75,85111 | Ceicen       | HG0262 | VERDADERO |
| a550962-4383627-121220-367_E21.CEL | RG Ap61 | A. palmata | San Bernardo | 9,70666  | -75,85111 | Ceicen       | HG0212 | VERDADERO |
| a550962-4368120-060520-251_E05.CEL | RG Ap62 | A. palmata | San Bernardo | 9,70666  | -75,85111 | Ceicen       | HG0212 | VERDADERO |
| a550962-4383627-121220-367_E23.CEL | RG Ap63 | A. palmata | San Bernardo | 9,70666  | -75,85111 | Ceicen       | HG0212 | VERDADERO |
| a550962-4368120-060520-251_E07.CEL | RG Ap64 | A. palmata | San Bernardo | 9,70666  | -75,85111 | Ceicen       | HG0167 | VERDADERO |
| a550962-4368120-060520-251_E09.CEL | RG Ap65 | A. palmata | San Bernardo | 9,80444  | -75,82111 | Batea        | HG0140 | VERDADERO |
| a550962-4368120-060520-251_E11.CEL | RG Ap66 | A. palmata | San Bernardo | 9,80808  | -75,83299 | Llantas      | HG0226 | VERDADERO |
| a550962-4383627-121220-367_G01.CEL | RG Ap67 | A. palmata | Capurganá    | 8,64472  | -77,33972 | Bajo Naui    | HG0196 | VERDADERO |
| a550962-4383627-121220-367_G03.CEL | RG Ap68 | A. palmata | Capurganá    | 8,64472  | -77,33972 | Bajo Naui    | HG0233 | VERDADERO |
| a550962-4368120-060520-251_E13.CEL | RG Ap69 | A. palmata | Capurganá    | 8,64472  | -77,33972 | Bajo Naui    | HG0225 | VERDADERO |
| a550962-4383627-121220-367_A07.CEL | RG Ap7  | A. palmata | Tayrona      | 11,32    | -74,20083 | I. Aguja     | HG0166 | VERDADERO |
| a550962-4383627-121220-367_G05.CEL | RG Ap70 | A. palmata | Capurganá    | 8,64472  | -77,33972 | Bajo Naui    | HG0217 | VERDADERO |
| a550962-4368120-060520-251_E15.CEL | RG Ap71 | A. palmata | Capurganá    | 8,64472  | -77,33972 | Bajo Naui    | HG0150 | VERDADERO |
| a550962-4383627-121220-367_G07.CEL | RG Ap72 | A. palmata | Capurganá    | 8,67111  | -77,35805 | Cabo Tiburon | HG0213 | VERDADERO |
| a550962-4368120-060520-251_E17.CEL | RG Ap73 | A. palmata | Capurganá    | 8,67111  | -77,35805 | Cabo Tiburon | HG0230 | VERDADERO |
| a550962-4383627-121220-367_G09.CEL | RG Ap74 | A. palmata | Capurganá    | 8,67111  | -77,35805 | Cabo Tiburon | HG0224 | VERDADERO |
| a550962-4368120-060520-251_E19.CEL | RG Ap75 | A. palmata | Capurganá    | 8,67111  | -77,35805 | Cabo Tiburon | HG0170 | VERDADERO |
| a550962-4368120-060520-251_E21.CEL | RG Ap76 | A. palmata | Capurganá    | 8,65278  | -77,34556 | Coquera      | HG0218 | VERDADERO |
| a550962-4383627-121220-367_G11.CEL | RG Ap77 | A. palmata | Capurganá    | 8,65278  | -77,34556 | Coquera      | HG0210 | VERDADERO |
| a550962-4368120-060520-251_E23.CEL | RG Ap78 | A. palmata | Capurganá    | 8,65278  | -77,34556 | Coquera      | HG0251 | VERDADERO |
| a550962-4368120-060520-251_G01.CEL | RG Ap79 | A. palmata | Capurganá    | 8,64472  | -77,33972 | Bajo Naui    | HG0250 | VERDADERO |
| a550962-4383627-121220-367_A09.CEL | RG Ap8  | A. palmata | Tayrona      | 11,32    | -74,20083 | I. Aguja     | HG0156 | VERDADERO |
| a550962-4383627-121220-367_G13.CEL | RG Ap80 | A. palmata | Capurganá    | 8,64472  | -77,33972 | Bajo Naui    | HG0163 | VERDADERO |
| a550962-4368120-060520-251_G03.CEL | RG Ap81 | A. palmata | Capurganá    | 8,64472  | -77,33972 | Bajo Naui    | HG0247 | VERDADERO |

|                                    |         |                |              |          |           |              |        |           |
|------------------------------------|---------|----------------|--------------|----------|-----------|--------------|--------|-----------|
| a550962-4383627-121220-367_G15.CEL | RG Ap82 | A. palmata     | Capurganá    | 8,64472  | -77,33972 | Bajo Naui    | HG0236 | VERDADERO |
| a550962-4383627-121220-367_G17.CEL | RG Ap83 | A. palmata     | Capurganá    | 8,64472  | -77,33972 | Bajo Naui    | HG0165 | VERDADERO |
| a550962-4383627-121220-367_G19.CEL | RG Ap84 | A. palmata     | Capurganá    | 8,64472  | -77,33972 | Bajo Naui    | HG0148 | VERDADERO |
| a550962-4368120-060520-251_G05.CEL | RG Ap85 | A. palmata     | Capurganá    | 8,64472  | -77,33972 | Bajo Naui    | HG0194 | VERDADERO |
| a550962-4368120-060520-251_G07.CEL | RG Ap86 | A. palmata     | Capurganá    | 8,64472  | -77,33972 | Bajo Naui    | HG0252 | VERDADERO |
| a550962-4383627-121220-367_G21.CEL | RG Ap87 | A. palmata     | San Andrés   | 14,3625  | -80,16138 | Serrana      | HG0139 | VERDADERO |
| a550962-4383627-121220-367_G23.CEL | RG Ap89 | A. palmata     | San Andrés   | 13,565   | -80,04055 | Roncador     | HG0195 | VERDADERO |
| a550962-4383627-121220-367_A11.CEL | RG Ap9  | A. palmata     | Tayrona      | 11,32    | -74,20083 | I. Aguja     | HG0171 | VERDADERO |
| a550962-4383627-121220-367_I01.CEL | RG Ap90 | A. palmata     | San Andrés   | 14,3625  | -80,16138 | Serrana      | HG0164 | VERDADERO |
| a550962-4368120-060520-251_G11.CEL | RG Ap91 | A. palmata     | San Andrés   | 14,3625  | -80,16138 | Serrana      | HG0216 | VERDADERO |
| a550962-4383627-121220-367_I03.CEL | RG Ap92 | A. palmata     | San Andrés   | 13,565   | -80,04055 | Roncador     | HG0193 | VERDADERO |
| a550962-4383627-121220-367_I05.CEL | RG Ap94 | A. palmata     | I. Arena     | 11,23472 | -75,60111 | I. Arena     | HG0169 | VERDADERO |
| a550962-4368120-060520-251_G15.CEL | RG Ap95 | A. palmata     | I. Arena     | 11,23472 | -75,60111 | I. Arena     | HG0160 | VERDADERO |
| a550962-4368120-060520-251_G17.CEL | RG Ap96 | A. palmata     | I. Arena     | 11,23472 | -75,60111 | I. Arena     | HG0149 | VERDADERO |
| a550962-4368120-060520-251_G19.CEL | RG Ap97 | A. palmata     | I. Arena     | 11,23472 | -75,60111 | I. Arena     | HG0215 | VERDADERO |
| a550962-4368120-060520-251_I07.CEL | RG Ac10 | A. cervicornis | Tayrona      | 11,33625 | -74,05276 | Cinto        | HG0111 | VERDADERO |
| a550962-4383627-121220-367_I13.CEL | RG Ac11 | A. cervicornis | Rosario      | 10,18555 | -75,73805 | I. Fiesta    | HG0044 | VERDADERO |
| a550962-4383627-121220-367_I15.CEL | RG Ac12 | A. cervicornis | Rosario      | 10,18444 | -75,73194 | I. Grande    | HG0047 | VERDADERO |
| a550962-4368120-060520-251_I09.CEL | RG Ac13 | A. cervicornis | Rosario      | 10,18444 | -75,73194 | I. Grande    | HG0069 | VERDADERO |
| a550962-4383627-121220-367_I17.CEL | RG Ac14 | A. cervicornis | Rosario      | 10,17194 | -75,75527 | Caribaru     | HG0073 | VERDADERO |
| a550962-4368120-060520-251_I11.CEL | RG Ac16 | A. cervicornis | Rosario      | 10,17194 | -75,75527 | Caribaru     | HG0068 | VERDADERO |
| a550962-4368120-060520-251_I13.CEL | RG Ac17 | A. cervicornis | Rosario      | 10,17194 | -75,75527 | Caribaru     | HG0023 | VERDADERO |
| a550962-4383627-121220-367_I21.CEL | RG Ac18 | A. cervicornis | Rosario      | 10,16962 | -75,75046 | Luis Guerra  | HG0097 | VERDADERO |
| a550962-4368120-060520-251_I15.CEL | RG Ac19 | A. cervicornis | Rosario      | 10,16962 | -75,75046 | Luis Guerra  | HG0116 | VERDADERO |
| a550962-4383627-121220-367_I23.CEL | RG Ac20 | A. cervicornis | Rosario      | 10,16962 | -75,75046 | Luis Guerra  | HG0127 | VERDADERO |
| a550962-4368120-060520-251_I17.CEL | RG Ac21 | A. cervicornis | Rosario      | 10,16962 | -75,75046 | Luis Guerra  | HG0017 | VERDADERO |
| a550962-4383627-121220-367_K01.CEL | RG Ac22 | A. cervicornis | Rosario      | 10,16962 | -75,75046 | Luis Guerra  | HG0064 | VERDADERO |
| a550962-4368120-060520-251_I21.CEL | RG Ac24 | A. cervicornis | Rosario      | 10,17306 | -75,76778 | Pavitos      | HG0114 | VERDADERO |
| a550962-4383627-121220-367_K03.CEL | RG Ac25 | A. cervicornis | Rosario      | 10,17306 | -75,76778 | Pavitos      | HG0114 | VERDADERO |
| a550962-4368120-060520-251_I23.CEL | RG Ac26 | A. cervicornis | Rosario      | 10,17306 | -75,76778 | Pavitos      | HG0018 | VERDADERO |
| a550962-4383627-121220-367_K07.CEL | RG Ac28 | A. cervicornis | San Bernardo | 9,70666  | -75,85111 | Ceicen       | HG0046 | VERDADERO |
| a550962-4368120-060520-251_K01.CEL | RG Ac29 | A. cervicornis | San Bernardo | 9,70666  | -75,85111 | Ceicen       | HG0046 | VERDADERO |
| a550962-4368120-060520-251_K03.CEL | RG Ac30 | A. cervicornis | San Bernardo | 9,70666  | -75,85111 | Ceicen       | HG0046 | VERDADERO |
| a550962-4368120-060520-251_K05.CEL | RG Ac31 | A. cervicornis | San Bernardo | 9,80222  | -75,8194  | Batea        | HG0062 | VERDADERO |
| a550962-4383627-121220-367_K09.CEL | RG Ac32 | A. cervicornis | San Bernardo | 9,80222  | -75,8194  | Batea        | HG0039 | VERDADERO |
| a550962-4368120-060520-251_K07.CEL | RG Ac33 | A. cervicornis | San Bernardo | 9,81472  | -75,85583 | Bajo Hojuela | HG0074 | VERDADERO |

|                                    |         |                |              |          |           |                |        |           |
|------------------------------------|---------|----------------|--------------|----------|-----------|----------------|--------|-----------|
| a550962-4383627-121220-367_K11.CEL | RG Ac34 | A. cervicornis | San Bernardo | 9,81472  | -75,85583 | Bajo Hojuela   | HG0097 | VERDADERO |
| a550962-4368120-060520-251_K09.CEL | RG Ac35 | A. cervicornis | San Bernardo | 9,81472  | -75,85583 | Bajo Hojuela   | HG0010 | VERDADERO |
| a550962-4383627-121220-367_K13.CEL | RG Ac36 | A. cervicornis | San Bernardo | 9,81472  | -75,85583 | Bajo Hojuela   | HG0097 | VERDADERO |
| a550962-4383627-121220-367_K15.CEL | RG Ac37 | A. cervicornis | San Bernardo | 9,75014  | -75,86858 | De los Santos  | HG0054 | VERDADERO |
| a550962-4368120-060520-251_K11.CEL | RG Ac38 | A. cervicornis | San Bernardo | 9,75014  | -75,86858 | De los Santos  | HG0028 | VERDADERO |
| a550962-4383627-121220-367_K17.CEL | RG Ac39 | A. cervicornis | San Bernardo | 9,75014  | -75,86858 | De los Santos  | HG0028 | VERDADERO |
| a550962-4368120-060520-251_I01.CEL | RG Ac4  | A. cervicornis | Tayrona      | 11,3213  | -74,12826 | Chengue        | HG0117 | VERDADERO |
| a550962-4383627-121220-367_K19.CEL | RG Ac40 | A. cervicornis | San Bernardo | 9,75014  | -75,86858 | De los Santos  | HG0054 | VERDADERO |
| a550962-4368120-060520-251_K13.CEL | RG Ac41 | A. cervicornis | San Bernardo | 9,75014  | -75,86858 | De los Santos  | HG0013 | VERDADERO |
| a550962-4368120-060520-251_K15.CEL | RG Ac42 | A. cervicornis | San Bernardo | 9,80244  | -75,81946 | La Pared       | HG0040 | VERDADERO |
| a550962-4383627-121220-367_K23.CEL | RG Ac44 | A. cervicornis | San Bernardo | 9,80244  | -75,81946 | La Pared       | HG0042 | VERDADERO |
| a550962-4383627-121220-367_M01.CEL | RG Ac45 | A. cervicornis | San Bernardo | 9,80244  | -75,81946 | La Pared       | HG0039 | VERDADERO |
| a550962-4368120-060520-251_K17.CEL | RG Ac46 | A. cervicornis | San Bernardo | 9,80244  | -75,81946 | La Pared       | HG0041 | VERDADERO |
| a550962-4368120-060520-251_K19.CEL | RG Ac47 | A. cervicornis | Capurganá    | 8,64472  | -77,33972 | Bajo Naui      | HG0012 | VERDADERO |
| a550962-4368120-060520-251_K21.CEL | RG Ac49 | A. cervicornis | Capurganá    | 8,64472  | -77,33972 | Bajo Naui      | HG0019 | VERDADERO |
| a550962-4368120-060520-251_K23.CEL | RG Ac50 | A. cervicornis | Capurganá    | 8,64472  | -77,33972 | Bajo Naui      | HG0072 | VERDADERO |
| a550962-4368120-060520-251_M01.CEL | RG Ac51 | A. cervicornis | Capurganá    | 8,64017  | -77,32317 | Golfo de Uraba | HG0025 | VERDADERO |
| a550962-4383627-121220-367_M05.CEL | RG Ac52 | A. cervicornis | Capurganá    | 8,64017  | -77,32317 | Golfo de Uraba | HG0025 | VERDADERO |
| a550962-4383627-121220-367_M07.CEL | RG Ac53 | A. cervicornis | Capurganá    | 8,64017  | -77,32317 | Golfo de Uraba | HG0025 | VERDADERO |
| a550962-4383627-121220-367_M09.CEL | RG Ac54 | A. cervicornis | Capurganá    | 8,67194  | -77,35722 | Cabo Tiburon   | HG0027 | VERDADERO |
| a550962-4368120-060520-251_M03.CEL | RG Ac55 | A. cervicornis | Capurganá    | 8,67194  | -77,35722 | Cabo Tiburon   | HG0016 | VERDADERO |
| a550962-4368120-060520-251_M05.CEL | RG Ac56 | A. cervicornis | Capurganá    | 8,67194  | -77,35722 | Cabo Tiburon   | HG0029 | VERDADERO |
| a550962-4383627-121220-367_M13.CEL | RG Ac58 | A. cervicornis | San Andrés   | 13,50027 | -80,03194 | Roncador       | HG0075 | VERDADERO |
| a550962-4368120-060520-251_M07.CEL | RG Ac59 | A. prolifera   | San Andrés   | 13,50027 | -80,03194 | Roncador       | HG0118 | VERDADERO |
| a550962-4383627-121220-367_I09.CEL | RG Ac6  | A. cervicornis | Tayrona      | 11,3213  | -74,12826 | Chengue        | HG0045 | VERDADERO |
| a550962-4368120-060520-251_M09.CEL | RG Ac60 | A. cervicornis | San Andrés   | 13,50027 | -80,03194 | Roncador       | HG0024 | VERDADERO |
| a550962-4383627-121220-367_M15.CEL | RG Ac61 | A. cervicornis | San Andrés   | 14,24861 | -81,23861 | Quita Sueño    | HG0022 | VERDADERO |
| a550962-4368120-060520-251_M11.CEL | RG Ac62 | A. cervicornis | San Andrés   | 14,24861 | -81,23861 | Quita Sueño    | HG0061 | VERDADERO |
| a550962-4383627-121220-367_M17.CEL | RG Ac63 | A. cervicornis | San Andrés   | 14,24861 | -81,23861 | Quita Sueño    | HG0096 | VERDADERO |
| a550962-4368120-060520-251_M13.CEL | RG Ac64 | A. cervicornis | San Andrés   | 14,24861 | -81,23861 | Quita Sueño    | HG0014 | VERDADERO |
| a550962-4368120-060520-251_M15.CEL | RG Ac65 | A. cervicornis | San Andrés   | 13,37777 | -81,38666 | Providencia    | HG0015 | VERDADERO |
| a550962-4368120-060520-251_M17.CEL | RG Ac66 | A. cervicornis | San Andrés   | 13,37777 | -81,38666 | Providencia    | HG0021 | VERDADERO |
| a550962-4383627-121220-367_M19.CEL | RG Ac67 | A. cervicornis | San Andrés   | 13,37777 | -81,38666 | Providencia    | HG0082 | VERDADERO |
| a550962-4368120-060520-251_M19.CEL | RG Ac68 | A. cervicornis | San Andrés   | 12,59528 | -81,71111 | West Point     | HG0112 | VERDADERO |
| a550962-4383627-121220-367_M21.CEL | RG Ac69 | A. cervicornis | San Andrés   | 12,59528 | -81,71111 | West Point     | HG0113 | VERDADERO |
| a550962-4368120-060520-251_I03.CEL | RG Ac7  | A. cervicornis | Tayrona      | 11,3213  | -74,12826 | Chengue        | HG0110 | VERDADERO |

|                                    |         |                |              |           |           |                |        |           |
|------------------------------------|---------|----------------|--------------|-----------|-----------|----------------|--------|-----------|
| a550962-4383627-121220-367_M23.CEL | RG Ac70 | A. cervicornis | San Andrés   | 12,59528  | -81,71111 | West Point     | HG0071 | VERDADERO |
| a550962-4368120-060520-251_M21.CEL | RG Ac71 | A. cervicornis | San Andrés   | 12,59528  | -81,71111 | Cayo Bolivar   | HG0020 | VERDADERO |
| a550962-4383627-121220-367_O01.CEL | RG Ac73 | A. cervicornis | San Andrés   | 12,59528  | -81,71111 | Plaza de Toros | HG0083 | VERDADERO |
| a550962-4383627-121220-367_O03.CEL | RG Ac74 | A. cervicornis | San Andrés   | 12,59528  | -81,71111 | Plaza de Toros | HG0084 | VERDADERO |
| a550962-4368120-060520-251_O01.CEL | RG Ac75 | A. cervicornis | San Andrés   | 12,59528  | -81,71111 | Plaza de Toros | HG0092 | VERDADERO |
| a550962-4368120-060520-251_O03.CEL | RG Ac76 | A. cervicornis | San Andrés   | 14,3625   | -80,16138 | Serrana        | HG0070 | VERDADERO |
| a550962-4383627-121220-367_O05.CEL | RG Ac77 | A. cervicornis | San Andrés   | 14,3625   | -80,16138 | Serrana        | HG0076 | VERDADERO |
| a550962-4368120-060520-251_O05.CEL | RG Ac78 | A. cervicornis | San Andrés   | 14,3625   | -80,16138 | Serrana        | HG0095 | VERDADERO |
| a550962-4383627-121220-367_O07.CEL | RG Ac79 | A. cervicornis | San Andrés   | 14,3625   | -80,16138 | Serrana        | HG0048 | VERDADERO |
| a550962-4368120-060520-251_I05.CEL | RG Ac8  | A. cervicornis | Tayrona      | 11,33625  | -74,05276 | Cinto          | HG0111 | VERDADERO |
| a550962-4383627-121220-367_O09.CEL | RG Ac82 | A. cervicornis | I. Arena     | 10,73864  | -75,3498  | I. Arena       | HG0038 | VERDADERO |
| a550962-4368120-060520-251_O11.CEL | RG Ac83 | A. cervicornis | I. Arena     | 10,73864  | -75,3498  | I. Arena       | HG0038 | VERDADERO |
| a550962-4368120-060520-251_O13.CEL | RG Ac84 | A. cervicornis | I. Arena     | 10,73864  | -75,3498  | I. Arena       | HG0038 | VERDADERO |
| a550962-4368120-060520-251_O19.CEL | RG Ac87 | A. prolifera   | I. Arena     | 10,73706  | -75,35616 | Hibrido 3      | HG0119 | VERDADERO |
| NA                                 | RG Ac1  | A. cervicornis | Tayrona      | 11,326494 | -74,07825 | Neguanje       | failed | VERDADERO |
| NA                                 | RG Ac15 | A. cervicornis | Rosario      | 10,17194  | -75,75527 | Caribaru       | failed | VERDADERO |
| NA                                 | RG Ac2  | A. cervicornis | Tayrona      | 11,32649  | -74,07825 | Neguanje       | failed | VERDADERO |
| NA                                 | RG Ac23 | A. cervicornis | Cartagena    | 10,24831  | -75,62425 | Cartagena      | failed | VERDADERO |
| NA                                 | RG Ac27 | A. cervicornis | San Bernardo | 9,70666   | -75,85111 | Ceicen         | failed | VERDADERO |
| NA                                 | RG Ac3  | A. cervicornis | Tayrona      | 11,326494 | -74,07825 | Neguanje       | failed | VERDADERO |
| NA                                 | RG Ac48 | A. cervicornis | Capurganá    | 8,64472   | -77,33972 | Bajo Naui      | failed | VERDADERO |
| NA                                 | RG Ac5  | A. cervicornis | Tayrona      | 11,3213   | -74,12826 | Chengue        | failed | VERDADERO |
| NA                                 | RG Ac72 | A. cervicornis | San Andrés   | 12,59528  | -81,71111 | Plaza de Toros | failed | VERDADERO |
| NA                                 | RG Ac80 | A. cervicornis | I. Fuerte    | 9,36818   | -76,20421 | I. Fuerte      | failed | VERDADERO |
| NA                                 | RG Ac81 | A. cervicornis | I. Fuerte    | 9,36818   | -76,20421 | I. Fuerte      | failed | VERDADERO |
| NA                                 | RG Ac85 | A. cervicornis | I. Arena     | 10,73706  | -75,35616 | Hibrido 1      | failed | VERDADERO |
| NA                                 | RG Ac86 | A. cervicornis | I. Arena     | 10,73706  | -75,35616 | Hibrido 2      | failed | VERDADERO |
| NA                                 | RG Ac88 | A. cervicornis | I. Arena     | 10,73706  | -75,35616 | Hibrido 4      | failed | VERDADERO |
| NA                                 | RG Ac89 | A. cervicornis | I. Arena     | 10,73706  | -75,35616 | Hibrido 5      | failed | VERDADERO |
| NA                                 | RG Ac9  | A. cervicornis | Tayrona      | 11,33625  | -74,05276 | Cinto          | failed | VERDADERO |
| NA                                 | RG Ap11 | A. palmata     | Tayrona      | 11,32097  | -74,07801 | Neguanje       | failed | VERDADERO |
| NA                                 | RG Ap12 | A. palmata     | Tayrona      | 11,32097  | -74,07801 | Neguanje       | failed | VERDADERO |
| NA                                 | RG Ap13 | A. palmata     | Tayrona      | 11,32097  | -74,07801 | Neguanje       | failed | VERDADERO |
| NA                                 | RG Ap16 | A. palmata     | Tayrona      | 11,31749  | -74,13393 | Chengue        | failed | VERDADERO |
| NA                                 | RG Ap23 | A. palmata     | Tayrona      | 11,33172  | -74,05947 | Cinto          | failed | VERDADERO |
| NA                                 | RG Ap24 | A. palmata     | Tayrona      | 11,33172  | -74,05947 | Cinto          | failed | VERDADERO |

|                                    |             |                |              |           |            |                        |        |           |
|------------------------------------|-------------|----------------|--------------|-----------|------------|------------------------|--------|-----------|
| NA                                 | RG Ap26     | A. palmata     | Tayrona      | 11,33172  | -74,05947  | Cinto                  | failed | VERDADERO |
| NA                                 | RG Ap27     | A. palmata     | Tayrona      | 11,33172  | -74,05947  | Cinto                  | failed | VERDADERO |
| NA                                 | RG Ap45     | A. palmata     | San Bernardo | 9,7613    | -75,87303  | Maravilla              | failed | VERDADERO |
| NA                                 | RG Ap56     | A. palmata     | San Bernardo | 9,76111   | -75,87277  | Maravilla              | failed | VERDADERO |
| NA                                 | RG Ap88     | A. palmata     | San Andrés   | 14,3625   | -80,16138  | Serrana                | failed | VERDADERO |
| NA                                 | RG Ap93     | A. palmata     | San Andrés   | 13,565    | -80,04055  | Roncador               | failed | VERDADERO |
| a550962-4368120-060520-253_G01.CEL | 15918       | A. cervicornis | Puerto Rico  | 18,004669 | -67,33082  | Margarita West Nursery | HG0210 | FALSO     |
| a550962-4368120-060520-253_G21.CEL | P199xC182_4 | A. cervicornis | Belize       | 16,436717 | -88,199017 | LaughingBirdCaye       | HG0207 | FALSO     |
| a550962-4368120-060520-253_J23.CEL | 6298        | A. cervicornis | Florida      | 24,517654 | -81,62134  | LowerKeys              | HG0208 | FALSO     |
| a550962-4368120-060520-253_K23.CEL | 6299        | A. cervicornis | Florida      | 24,517654 | -81,62134  | LowerKeys              | HG0206 | FALSO     |
| a550962-4368120-060520-253_O23.CEL | 6303        | A. cervicornis | Florida      | 24,517654 | -81,62134  | LowerKeys              | HG0209 | FALSO     |
| a550962-4368120-060520-252_C07.CEL | 4917        | A. cervicornis | Florida      | 24,946333 | -80,470166 | Little Conch           | HG0138 | FALSO     |
| a550962-4368120-060520-252_C09.CEL | 4918        | A. cervicornis | Florida      | 24,9509   | -80,493617 | Plantation Key         | HG0149 | FALSO     |
| a550962-4368120-060520-252_E01.CEL | 9395        | A. cervicornis | Florida      | 24,517654 | -81,62134  | LowerKeys              | HG0152 | FALSO     |
| a550962-4368120-060520-252_E05.CEL | 9592        | A. cervicornis | Florida      | 25,37236  | -80,17155  | Biscayne National Park | HG0146 | FALSO     |
| a550962-4368120-060520-252_E07.CEL | 9609        | A. cervicornis | Florida      | 25,42616  | -80,14175  | Biscayne National Park | HG0148 | FALSO     |
| a550962-4368120-060520-252_E09.CEL | 9749        | A. cervicornis | Puerto Rico  | 17,949552 | -66,727433 | Margara                | HG0151 | FALSO     |
| a550962-4368120-060520-252_E11.CEL | 9759        | A. cervicornis | Puerto Rico  | 17,949552 | -66,727433 | Margara                | HG0150 | FALSO     |
| a550962-4368120-060520-252_G11.CEL | 13756       | A. cervicornis | USVI         | 18,316367 | -64,98855  | FlatKey                | HG0144 | FALSO     |
| a550962-4368120-060520-252_I05.CEL | 13923       | A. cervicornis | Curacao      | 12,043117 | -68,762433 | East Point             | HG0137 | FALSO     |
| a550962-4368120-060520-252_I13.CEL | 13935       | A. cervicornis | Curacao      | 12,109283 | -68,954933 | WaterFactory           | HG0136 | FALSO     |
| a550962-4368120-060520-252_I19.CEL | 15364       | A. cervicornis | Belize       | 16,182848 | -88,65966  | site 12                | HG0154 | FALSO     |
| a550962-4368120-060520-252_I21.CEL | 15371       | A. cervicornis | Belize       | 16,182848 | -88,65966  | Carne Nursery          | HG0142 | FALSO     |
| a550962-4368120-060520-252_I23.CEL | 15372       | A. cervicornis | Belize       | 16,182848 | -88,65966  | dory channel           | HG0143 | FALSO     |
| a550962-4368120-060520-252_K03.CEL | 15375       | A. cervicornis | Belize       | 16,182848 | -88,65966  | False Caye             | HG0139 | FALSO     |
| a550962-4368120-060520-252_K05.CEL | 15377       | A. cervicornis | Belize       | 16,182848 | -88,65966  | by_RHT1                | HG0145 | FALSO     |
| a550962-4368120-060520-252_K07.CEL | 15378       | A. cervicornis | Belize       | 16,182848 | -88,65966  | BBC_patch              | HG0147 | FALSO     |
| a550962-4368120-060520-252_K13.CEL | 15626       | A. cervicornis | Belize       | 16,790939 | -88,083006 | Curlew                 | HG0135 | FALSO     |
| a550962-4368120-060520-252_M09.CEL | 15616       | A. cervicornis | Belize       | 16,182848 | -88,65966  | Glovers-118            | HG0153 | FALSO     |
| a550962-4368120-060520-252_O01.CEL | 15719       | A. cervicornis | Belize       | 16,182848 | -88,65966  | Belize                 | HG0141 | FALSO     |
| a550962-4368120-060520-252_O21.CEL | 15729       | A. cervicornis | Cuba         | 23,220565 | -82,346683 | JudyLang               | HG0140 | FALSO     |
| a550962-4368120-060520-256_A09.CEL | 4936        | A. cervicornis | Florida      | 24,812933 | -80,669567 | Lower Matecumbe        | HG0026 | FALSO     |
| a550962-4368120-060520-256_A11.CEL | 4955        | A. cervicornis | Florida      | 25,13985  | -80,294583 | CRF                    | HG0042 | FALSO     |
| a550962-4368120-060520-256_A13.CEL | 6649        | A. cervicornis | Florida      | 24,692317 | -80,97575  | CRF                    | HG0002 | FALSO     |
| a550962-4368120-060520-256_A15.CEL | 9719        | A. cervicornis | Puerto Rico  | 17,949552 | -66,727433 | Margara                | HG0030 | FALSO     |
| a550962-4368120-060520-256_A19.CEL | 13716       | A. cervicornis | USVI         | 18,405727 | -64,90444  | HansLollik             | HG0006 | FALSO     |

|                                    |             |                |             |           |            |                        |        |       |
|------------------------------------|-------------|----------------|-------------|-----------|------------|------------------------|--------|-------|
| a550962-4368120-060520-256_A23.CEL | 4915        | A. cervicornis | Florida     | 24,9519   | -80,451133 | Conch Reef             | HG0057 | FALSO |
| a550962-4368120-060520-256_C07.CEL | 4909        | A. cervicornis | Florida     | 25,003583 | -80,450917 | Patch Reef             | HG0037 | FALSO |
| a550962-4368120-060520-256_C09.CEL | 4943        | A. cervicornis | Florida     | 24,80205  | -80,667367 | Lower Matecumbe        | HG0047 | FALSO |
| a550962-4368120-060520-256_C11.CEL | 4956        | A. cervicornis | Florida     | 25,0208   | -80,40085  | CRF                    | HG0054 | FALSO |
| a550962-4368120-060520-256_C13.CEL | 6653        | A. cervicornis | Florida     | 24,692317 | -80,97575  | CRF                    | HG0028 | FALSO |
| a550962-4368120-060520-256_E07.CEL | 4911        | A. cervicornis | Florida     | 25,00945  | -80,4514   | Patch Reef             | HG0050 | FALSO |
| a550962-4368120-060520-256_E09.CEL | 4944        | A. cervicornis | Florida     | 24,817933 | -80,651767 | CRF                    | HG0041 | FALSO |
| a550962-4368120-060520-256_E11.CEL | 4958        | A. cervicornis | Florida     | 24,72015  | -80,92875  | Grassy Key             | HG0043 | FALSO |
| a550962-4368120-060520-256_E23.CEL | SIBM13_3    | A. cervicornis | Florida     | 25,0179   | -80,368617 | Sandisland Blue x M13  | HG0027 | FALSO |
| a550962-4368120-060520-256_G05.CEL | 3844        | A. cervicornis | USVI        | 18,31822  | -64,99104  | Flat Cay               | HG0003 | FALSO |
| a550962-4368120-060520-256_G07.CEL | 4913        | A. cervicornis | Florida     | 24,9886   | -80,402567 | Pickles Reef           | HG0044 | FALSO |
| a550962-4368120-060520-256_G09.CEL | 4945        | A. cervicornis | Florida     | 24,80255  | -80,6524   | Lower Matecumbe        | HG0014 | FALSO |
| a550962-4368120-060520-256_G11.CEL | 4963        | A. cervicornis | Florida     | 24,692317 | -80,97575  | Grassy Key             | HG0023 | FALSO |
| a550962-4368120-060520-256_G23.CEL | SIBM13_4    | A. cervicornis | Florida     | 25,0179   | -80,368617 | Sandisland Blue x M13  | HG0051 | FALSO |
| a550962-4368120-060520-256_I03.CEL | 1372_Symbio | A. cervicornis | Florida     | 25,373333 | -80,160217 | Marker 3               | HG0024 | FALSO |
| a550962-4368120-060520-256_I07.CEL | 4914        | A. cervicornis | Florida     | 24,986167 | -80,4171   | Pickles Reef           | HG0040 | FALSO |
| a550962-4368120-060520-256_I09.CEL | 4949        | A. cervicornis | Florida     | 25,014683 | -80,416917 | CRF                    | HG0019 | FALSO |
| a550962-4368120-060520-256_I11.CEL | 4964        | A. cervicornis | Florida     | 24,692317 | -80,97575  | Grassy Key             | HG0016 | FALSO |
| a550962-4368120-060520-256_I15.CEL | 11409       | A. cervicornis | Belize      | 17,833433 | -87,992347 | Coral Gardens          | HG0039 | FALSO |
| a550962-4368120-060520-256_I19.CEL | 13829       | A. cervicornis | Belize      | 16,88806  | -87,75973  | GloversAtoll           | HG0029 | FALSO |
| a550962-4368120-060520-256_K07.CEL | 4919        | A. cervicornis | Florida     | 24,951883 | -80,491617 | Patch Reef             | HG0060 | FALSO |
| a550962-4368120-060520-256_K09.CEL | 4951        | A. cervicornis | Florida     | 24,813617 | -80,666967 | Lower Matecumbe        | HG0052 | FALSO |
| a550962-4368120-060520-256_K13.CEL | 9577        | A. cervicornis | Florida     | 25,39894  | -80,16032  | Biscayne National Park | HG0015 | FALSO |
| a550962-4368120-060520-256_K19.CEL | 13839       | A. cervicornis | Belize      | 16,88806  | -87,75973  | GloversAtoll           | HG0059 | FALSO |
| a550962-4368120-060520-256_K23.CEL | SIBM13_7    | A. cervicornis | Florida     | 25,0179   | -80,368617 | Sandisland Blue x M13  | HG0056 | FALSO |
| a550962-4368120-060520-256_M05.CEL | 4878        | A. cervicornis | Florida     | 24,947083 | -80,4659   | Conch Reef             | HG0007 | FALSO |
| a550962-4368120-060520-256_M07.CEL | 4922        | A. cervicornis | Florida     | 25,013717 | -80,415    | Patch Reef             | HG0038 | FALSO |
| a550962-4368120-060520-256_M09.CEL | 4952        | A. cervicornis | Florida     | 24,821633 | -80,65575  | Lower Matecumbe        | HG0058 | FALSO |
| a550962-4368120-060520-256_M13.CEL | 9607        | A. cervicornis | Florida     | 25,42616  | -80,14175  | Biscayne National Park | HG0045 | FALSO |
| a550962-4368120-060520-256_M23.CEL | SIBM13_8    | A. cervicornis | Florida     | 25,0179   | -80,368617 | Sandisland Blue x M13  | HG0031 | FALSO |
| a550962-4368120-060520-256_O05.CEL | 4897        | A. cervicornis | Florida     | 25,00275  | -80,422917 | Molasses Reef          | HG0018 | FALSO |
| a550962-4368120-060520-256_O07.CEL | 4932        | A. cervicornis | Florida     | 24,832183 | -80,640767 | Lower Matecumbe        | HG0017 | FALSO |
| a550962-4368120-060520-256_O09.CEL | 4953        | A. cervicornis | Florida     | 24,9524   | -80,451133 | Conch Reef             | HG0053 | FALSO |
| a550962-4368120-060520-256_O13.CEL | 9610        | A. cervicornis | Florida     | 25,42616  | -80,14175  | Biscayne National Park | HG0013 | FALSO |
| a550962-4393310-052921-062_A01.CEL | 16065(441)  | A. palmata     | Curacao     | 12,064193 | -68,853068 | Spanish Waters         | HG0432 | FALSO |
| a550962-4368120-060520-253_A01.CEL | 15915       | A. palmata     | Puerto Rico | 18,004669 | -67,33082  | Margarita West Nursery | HG0262 | FALSO |

|                                    |       |            |             |           |            |                         |        |       |
|------------------------------------|-------|------------|-------------|-----------|------------|-------------------------|--------|-------|
| a550962-4368120-060520-253_A03.CEL | 15629 | A. palmata | Belize      | 16,80145  | -88,0827   | SouthCarrieBowCaye      | HG0250 | FALSO |
| a550962-4368120-060520-253_A05.CEL | 15931 | A. palmata | Puerto Rico | 18,352618 | -65,573963 | Palomino Nursery        | HG0221 | FALSO |
| a550962-4368120-060520-253_A07.CEL | 15939 | A. palmata | Puerto Rico | 17,9411   | -66,8686   | San Cristobal Nursery   | HG0226 | FALSO |
| a550962-4368120-060520-253_A11.CEL | 15857 | A. palmata | Puerto Rico | 17,938    | -66,8713   | Cayo Coral East Nursery | HG0220 | FALSO |
| a550962-4368120-060520-253_A15.CEL | 15873 | A. palmata | Puerto Rico | 17,939048 | -66,89222  | Cayo Coral West Nursery | HG0223 | FALSO |
| a550962-4368120-060520-253_A17.CEL | 15884 | A. palmata | Puerto Rico | 17,939048 | -66,89222  | Cayo Coral West Nursery | HG0232 | FALSO |
| a550962-4368120-060520-253_A19.CEL | 15895 | A. palmata | Puerto Rico | 17,9243   | -67,0999   | Margarita East Nursery  | HG0235 | FALSO |
| a550962-4368120-060520-253_C07.CEL | 15940 | A. palmata | Puerto Rico | 17,9411   | -66,8686   | San Cristobal Nursery   | HG0225 | FALSO |
| a550962-4368120-060520-253_C09.CEL | 15948 | A. palmata | Puerto Rico | 17,94407  | -67,07786  | San Cristobal Nursery   | HG0227 | FALSO |
| a550962-4368120-060520-253_C11.CEL | 15858 | A. palmata | Puerto Rico | 17,938    | -66,8713   | Cayo Coral East Nursery | HG0242 | FALSO |
| a550962-4368120-060520-253_C15.CEL | 15874 | A. palmata | Puerto Rico | 18,004669 | -67,33082  | Cayo Coral West Nursery | HG0260 | FALSO |
| a550962-4368120-060520-253_C17.CEL | 15885 | A. palmata | Puerto Rico | 17,939048 | -66,89222  | Cayo Coral West Nursery | HG0241 | FALSO |
| a550962-4368120-060520-253_C19.CEL | 15900 | A. palmata | Puerto Rico | 17,9243   | -67,0999   | Margarita East Nursery  | HG0261 | FALSO |
| a550962-4368120-060520-253_E01.CEL | 15917 | A. palmata | Puerto Rico | 18,004669 | -67,33082  | Margarita West Nursery  | HG0237 | FALSO |
| a550962-4368120-060520-253_E07.CEL | 15630 | A. palmata | Belize      | 16,80145  | -88,0827   | SouthCarrieBowCaye      | HG0222 | FALSO |
| a550962-4368120-060520-253_E09.CEL | 15949 | A. palmata | Puerto Rico | 17,9411   | -66,8686   | San Cristobal Nursery   | HG0259 | FALSO |
| a550962-4368120-060520-253_E13.CEL | 15867 | A. palmata | Puerto Rico | 17,9411   | -66,8686   | Cayo Coral West Nursery | HG0228 | FALSO |
| a550962-4368120-060520-253_E17.CEL | 15887 | A. palmata | Puerto Rico | 17,9411   | -66,8686   | Cayo Coral West Nursery | HG0252 | FALSO |
| a550962-4368120-060520-253_G09.CEL | 15950 | A. palmata | Puerto Rico | 17,94407  | -67,07786  | San Cristobal Nursery   | HG0249 | FALSO |
| a550962-4368120-060520-253_G13.CEL | 15868 | A. palmata | Puerto Rico | 18,004669 | -67,33082  | Cayo Coral West Nursery | HG0246 | FALSO |
| a550962-4368120-060520-253_G17.CEL | 15888 | A. palmata | Puerto Rico | 17,9411   | -66,8686   | Cayo Coral West Nursery | HG0239 | FALSO |
| a550962-4368120-060520-253_G19.CEL | 15905 | A. palmata | Puerto Rico | 17,9243   | -67,0999   | Margarita East Nursery  | HG0258 | FALSO |
| a550962-4368120-060520-253_I01.CEL | 15627 | A. palmata | Belize      | 16,80145  | -88,0827   | SouthCarrieBowCaye      | HG0244 | FALSO |
| a550962-4368120-060520-253_I05.CEL | 15935 | A. palmata | Puerto Rico | 17,9411   | -66,8686   | San Cristobal Nursery   | HG0256 | FALSO |
| a550962-4368120-060520-253_I13.CEL | 15869 | A. palmata | Puerto Rico | 17,9411   | -66,8686   | Cayo Coral West Nursery | HG0254 | FALSO |
| a550962-4368120-060520-253_I15.CEL | 15877 | A. palmata | Puerto Rico | 17,9411   | -66,8686   | Cayo Coral West Nursery | HG0253 | FALSO |
| a550962-4368120-060520-253_I17.CEL | 15891 | A. palmata | Puerto Rico | 17,9411   | -66,8686   | Cayo Coral West Nursery | HG0255 | FALSO |
| a550962-4368120-060520-253_K05.CEL | 15936 | A. palmata | Puerto Rico | 17,94407  | -67,07786  | San Cristobal Nursery   | HG0230 | FALSO |
| a550962-4368120-060520-253_K07.CEL | 15944 | A. palmata | Puerto Rico | 17,9411   | -66,8686   | San Cristobal Nursery   | HG0238 | FALSO |
| a550962-4368120-060520-253_K13.CEL | 15870 | A. palmata | Puerto Rico | 17,939048 | -66,89222  | Cayo Coral West Nursery | HG0240 | FALSO |
| a550962-4368120-060520-253_M05.CEL | 15937 | A. palmata | Puerto Rico | 17,9411   | -66,8686   | San Cristobal Nursery   | HG0245 | FALSO |
| a550962-4368120-060520-253_M07.CEL | 15945 | A. palmata | Puerto Rico | 17,9411   | -66,8686   | San Cristobal Nursery   | HG0248 | FALSO |
| a550962-4368120-060520-253_M09.CEL | 15953 | A. palmata | Puerto Rico | 17,9411   | -66,8686   | Gilligans Reef          | HG0236 | FALSO |
| a550962-4368120-060520-253_M13.CEL | 15871 | A. palmata | Puerto Rico | 17,939048 | -66,89222  | Cayo Coral West Nursery | HG0251 | FALSO |
| a550962-4368120-060520-253_M17.CEL | 15893 | A. palmata | Puerto Rico | 17,9411   | -66,8686   | Cayo Coral West Nursery | HG0224 | FALSO |
| a550962-4368120-060520-253_O05.CEL | 15938 | A. palmata | Puerto Rico | 17,9411   | -66,8686   | San Cristobal Nursery   | HG0257 | FALSO |

|                                    |       |            |             |           |            |                         |        |       |
|------------------------------------|-------|------------|-------------|-----------|------------|-------------------------|--------|-------|
| a550962-4368120-060520-253_O07.CEL | 15946 | A. palmata | Puerto Rico | 17,9411   | -66,8686   | San Cristobal Nursery   | HG0243 | FALSO |
| a550962-4368120-060520-253_O09.CEL | 15954 | A. palmata | Puerto Rico | 17,9411   | -66,8686   | Gilligans Reef          | HG0247 | FALSO |
| a550962-4368120-060520-253_O13.CEL | 15872 | A. palmata | Puerto Rico | 17,9411   | -66,8686   | Cayo Coral West Nursery | HG0231 | FALSO |
| a550962-4368120-060520-253_O17.CEL | 15894 | A. palmata | Puerto Rico | 17,9411   | -66,8686   | Cayo Coral West Nursery | HG0229 | FALSO |
| a550962-4368120-060520-252_A17.CEL | 1151  | A. palmata | Florida     | 24,456017 | -81,859633 | RockKey                 | HG0171 | FALSO |
| a550962-4368120-060520-252_A23.CEL | 2905  | A. palmata | Florida     | 25,022308 | -80,402375 | KL4NOAA                 | HG0166 | FALSO |
| a550962-4368120-060520-252_C11.CEL | 5130  | A. palmata | Puerto Rico | 17,56493  | -67,04515  | San Cristobal           | HG0177 | FALSO |
| a550962-4368120-060520-252_C13.CEL | 6898  | A. palmata | Florida     | 24,54585  | -81,405067 | Looe Key                | HG0186 | FALSO |
| a550962-4368120-060520-252_E13.CEL | 11954 | A. palmata | Florida     | 24,710868 | -80,947981 | CRF                     | HG0201 | FALSO |
| a550962-4368120-060520-252_E15.CEL | 11956 | A. palmata | Florida     | 24,710868 | -80,947981 | CRF                     | HG0197 | FALSO |
| a550962-4368120-060520-252_E17.CEL | 11955 | A. palmata | Florida     | 24,710868 | -80,947981 | CRF                     | HG0204 | FALSO |
| a550962-4368120-060520-252_E19.CEL | 11957 | A. palmata | Florida     | 24,710868 | -80,947981 | CRF                     | HG0174 | FALSO |
| a550962-4368120-060520-252_E21.CEL | 11958 | A. palmata | Florida     | 24,710868 | -80,947981 | CRF                     | HG0205 | FALSO |
| a550962-4368120-060520-252_E23.CEL | 11962 | A. palmata | Florida     | 24,710868 | -80,947981 | CRF                     | HG0185 | FALSO |
| a550962-4368120-060520-252_G01.CEL | 11963 | A. palmata | Florida     | 24,710868 | -80,947981 | CRF                     | HG0202 | FALSO |
| a550962-4368120-060520-252_G05.CEL | 13694 | A. palmata | USVI        | 18,357883 | -65,032967 | Botany2                 | HG0175 | FALSO |
| a550962-4368120-060520-252_G07.CEL | 13710 | A. palmata | USVI        | 18,359033 | -65,032833 | Botany2                 | HG0165 | FALSO |
| a550962-4368120-060520-252_G15.CEL | 13805 | A. palmata | Belize      | 16,772567 | -88,1111   | Sandbores2              | HG0170 | FALSO |
| a550962-4368120-060520-252_G17.CEL | 13809 | A. palmata | Belize      | 16,801322 | -88,0825   | SouthCarrieBowCay       | HG0199 | FALSO |
| a550962-4368120-060520-252_G19.CEL | 13811 | A. palmata | Belize      | 16,92005  | -87,767217 | GloversAtoll            | HG0187 | FALSO |
| a550962-4368120-060520-252_G21.CEL | 13835 | A. palmata | Belize      | 16,9084   | -87,767217 | GloversAtoll            | HG0190 | FALSO |
| a550962-4368120-060520-252_I01.CEL | 13909 | A. palmata | Curacao     | 12,083133 | -68,895567 | SeaAquarium2            | HG0191 | FALSO |
| a550962-4368120-060520-252_I03.CEL | 13921 | A. palmata | Curacao     | 12,0633   | -68,859033 | DirectorsBay            | HG0173 | FALSO |
| a550962-4368120-060520-252_I07.CEL | 13927 | A. palmata | Curacao     | 12,043367 | -68,762517 | EastPoint2              | HG0193 | FALSO |
| a550962-4368120-060520-252_I09.CEL | 13929 | A. palmata | Curacao     | 12,043467 | -68,76315  | EastPoint2              | HG0176 | FALSO |
| a550962-4368120-060520-252_I11.CEL | 13931 | A. palmata | Curacao     | 12,043317 | -68,763533 | EastPoint2              | HG0194 | FALSO |
| a550962-4368120-060520-252_I15.CEL | 13937 | A. palmata | Curacao     | 12,109517 | -68,955367 | WaterFactory2           | HG0172 | FALSO |
| a550962-4368120-060520-252_I17.CEL | 13972 | A. palmata | Curacao     | 12,109617 | -68,954517 | WaterFactory2           | HG0168 | FALSO |
| a550962-4368120-060520-252_K09.CEL | 15391 | A. palmata | Belize      | 16,182848 | -88,65966  | 1D                      | HG0169 | FALSO |
| a550962-4368120-060520-252_K11.CEL | 15395 | A. palmata | Belize      | 16,182848 | -88,65966  | CBC wypt 51             | HG0192 | FALSO |
| a550962-4368120-060520-252_K15.CEL | 15397 | A. palmata | Belize      | 16,182848 | -88,65966  | SWCB2                   | HG0178 | FALSO |
| a550962-4368120-060520-252_K17.CEL | 15398 | A. palmata | Belize      | 16,182848 | -88,65966  | N of bath room          | HG0198 | FALSO |
| a550962-4368120-060520-252_K21.CEL | 15610 | A. palmata | Belize      | 16,801322 | -88,0825   | SouthCarrieBow          | HG0189 | FALSO |
| a550962-4368120-060520-252_K23.CEL | 15611 | A. palmata | Belize      | 16,801322 | -88,0825   | SouthCarrieBow          | HG0196 | FALSO |
| a550962-4368120-060520-252_M01.CEL | 15612 | A. palmata | Belize      | 16,801322 | -88,0825   | SouthCarrieBow          | HG0195 | FALSO |
| a550962-4368120-060520-252_M03.CEL | 15613 | A. palmata | Belize      | 16,80145  | -88,0827   | SouthCarrieBowCaye      | HG0119 | FALSO |

|                                    |             |            |         |           |            |                       |        |       |
|------------------------------------|-------------|------------|---------|-----------|------------|-----------------------|--------|-------|
| a550962-4368120-060520-252_M15.CEL | 15619       | A. palmata | Belize  | 16,80145  | -88,0827   | SouthCarrieBowCaye    | HG0188 | FALSO |
| a550962-4368120-060520-252_M17.CEL | 15620       | A. palmata | Belize  | 16,80145  | -88,0827   | SouthCarrieBowCaye    | HG0203 | FALSO |
| a550962-4368120-060520-252_M21.CEL | 15622       | A. palmata | Belize  | 16,80145  | -88,0827   | SouthCarrieBowCaye    | HG0200 | FALSO |
| a550962-4368120-060520-252_O19.CEL | 15720       | A. palmata | Belize  | 16,182848 | -88,65966  | Belize                | HG0167 | FALSO |
| a550962-4368120-060520-256_A03.CEL | 1127_Mixed  | A. palmata | Florida | 24,456017 | -81,859633 | RockKey               | HG0079 | FALSO |
| a550962-4368120-060520-256_A05.CEL | 2724        | A. palmata | Florida | 25,01015  | -80,37328  | ML3                   | HG0123 | FALSO |
| a550962-4368120-060520-256_A21.CEL | 14391       | A. palmata | Belize  | 17,268611 | -87,816944 | Carne Nursery         | HG0127 | FALSO |
| a550962-4368120-060520-256_C01.CEL | 1087        | A. palmata | Florida | 24,479867 | -81,718667 | Western Sambo         | HG0108 | FALSO |
| a550962-4368120-060520-256_C03.CEL | 1132_Symbio | A. palmata | Florida | 24,456017 | -81,859633 | RockKey               | HG0129 | FALSO |
| a550962-4368120-060520-256_C05.CEL | 2870        | A. palmata | Florida | 25,108917 | -80,30525  | GR1                   | HG0130 | FALSO |
| a550962-4368120-060520-256_C15.CEL | 11293       | A. palmata | Belize  | 17,833433 | -87,992347 | Coral Gardens         | HG0109 | FALSO |
| a550962-4368120-060520-256_G03.CEL | 1301        | A. palmata | Florida | 24,6209   | -82,8675   | DryTortugas2          | HG0107 | FALSO |
| a550962-4368120-060520-256_I01.CEL | 1104        | A. palmata | Florida | 24,479867 | -81,718667 | Western Sambo         | HG0120 | FALSO |
| a550962-4368120-060520-256_I23.CEL | SIBM13_5    | A. palmata | Florida | 25,0179   | -80,368617 | Sandisland Blue x M13 | HG0133 | FALSO |
| a550962-4368120-060520-256_K01.CEL | 1105        | A. palmata | Florida | 24,479867 | -81,718667 | Western Sambo         | HG0124 | FALSO |
| a550962-4368120-060520-256_K11.CEL | 5735        | A. palmata | Florida | 25,00912  | -80,37473  | ML3                   | HG0080 | FALSO |
