# Supplementary material for: Fine scale population structure of Acropora palmata and Acropora cervicornis in the Colombian Caribbean
Source: PubMed Central journal article supplement (PMC9438773; doi:10.7717/peerj.13854), 2022-08-30
Supplement: peerj-10-13854-s011.pdf [file peerj-10-13854-s011.pdf]

| ID    | Affy probe id | STAGdb probe i | chrom        | pos     | Ordered Alle | pca_pvalue_p1 | pca_qvalue  | PCAdapt | Bayescan  |            |         | CDS annotation                                                                                           |
|-------|---------------|----------------|--------------|---------|--------------|---------------|-------------|---------|-----------|------------|---------|----------------------------------------------------------------------------------------------------------|
|       |               |                |              |         |              |               |             | outlier | BAYES_fst | BAYES_qval | outlier |                                                                                                          |
| 19104 | AX-212310281  | AP_var_5651    | NW_015442071 | 25442   | A // G       | 9,17E-06      | 0,000132416 | outlier | 0,028811  | 0,35001    | n.s.    | uncharacterized LOC107328026                                                                             |
| 19590 | AX-212304636  | Apop_10406     | NW_015442651 | 15241   | T // C       | 0,000160943   | 0,001633826 | outlier | 0,023925  | 0,52882    | n.s.    | uncharacterized LOC107330225%2C transcript variant X2                                                    |
| 3382  | AX-212301922  | Apop_07709     | NW_015441089 | 549133  | C // G       | 6,00E-10      | 2,23E-08    | outlier | 0,066735  | 0,085132   | n.s.    | forkhead box protein D1-like                                                                             |
| 4108  | AX-212315302  | Apop_07801     | NW_015441098 | 724132  | T // C       | 2,99E-08      | 8,07E-07    | outlier | 0,058156  | 0,089135   | n.s.    | autophagy-related protein 13-like                                                                        |
| 4280  | AX-212315353  | Apop_07852     | NW_015441104 | 88147   | A // G       | 0,000147478   | 0,001555287 | outlier | 0,022563  | 0,6243     | n.s.    | DNA repair protein XRCC4-like                                                                            |
| 4316  | AX-197963094  | Apop_00503     | NW_015441104 | 588950  | C // G       | 1,66E-06      | 2,83E-05    | outlier | 0,025823  | 0,42056    | n.s.    | dnaJ homolog subfamily C member 22-like                                                                  |
| 5412  | AX-212315462  | Apop_07961     | NW_015441117 | 837655  | T // C       | 1,86E-07      | 3,92E-06    | outlier | 0,06413   | 0,060658   | n.s.    | uncharacterized LOC107334565                                                                             |
| 7698  | AX-197981617  | Apop_02675     | NW_015441168 | 682199  | A // C       | 0,000943292   | 0,006852142 | outlier | 0,022684  | 0,57447    | n.s.    | inactive tyrosine-protein kinase transmembrane receptor ROR1-like%2C transcript variant X1               |
| 11218 | AX-197981819  | Apop_02795     | NW_015441279 | 25073   | A // G       | 4,78E-09      | 1,49E-07    | outlier | 0,046834  | 0,13657    | n.s.    | uncharacterized LOC107344143                                                                             |
| 11736 | AX-212303204  | Apop_08974     | NW_015441299 | 222088  | A // G       | 0,000235594   | 0,002194387 | outlier | 0,023798  | 0,51716    | n.s.    | partitioning defective protein 3-like                                                                    |
| 10194 | AX-212302940  | Apop_08710     | NW_015441239 | 300859  | T // C       | 1,40E-06      | 2,48E-05    | outlier | 0,022997  | 0,54532    | n.s.    | alpha-methylacyl-CoA racemase-like                                                                       |
| 11796 | AX-197981934  | Apop_02864     | NW_015441302 | 481804  | T // C       | 0,000161754   | 0,001633826 | outlier | 0,024699  | 0,49033    | n.s.    | E3 ubiquitin-protein ligase TRIM71-like                                                                  |
| 14024 | AX-212311399  | Apop_03913     | NW_015441389 | 418943  | A // G       | 1,92E-09      | 6,45E-08    | outlier | 0,060843  | 0,086283   | n.s.    | adhesion G-protein coupled receptor D1-like%2C transcript variant X2                                     |
| 1900  | AX-198038154  | Afix_02306     | NW_015441069 | 1289395 | A // G       | 0,000313461   | 0,002771831 | outlier | 0,020644  | 0,88832    | n.s.    | neuronal acetylcholine receptor subunit alpha-10-like%2C transcript variant X1                           |
| 15660 | AX-212295654  | AP_var_4310    | NW_015441495 | 277602  | T // C       | 0,001026071   | 0,007314654 | outlier | 0,022014  | 0,62856    | n.s.    | phosphatidylinositol 5-phosphate 4-kinase type-2 beta-like                                               |
| 15950 | AX-197965548  | Apop_01947     | NW_015441509 | 318777  | T // C       | 0,000226991   | 0,002129799 | outlier | 0,023179  | 0,57028    | n.s.    | tctex1 domain-containing protein 1-B-like                                                                |
| 15970 | AX-212317104  | Apop_09586     | NW_015441512 | 170081  | A // C       | 0,000850421   | 0,006383432 | outlier | 0,021881  | 0,63803    | n.s.    | alpha-1%2C3-mannosyl-glycoprotein 4-beta-N-acetylglucosaminyltransferase B-like%2C transcript variant X1 |
| 18056 | AX-212309845  | AP_var_5215    | NW_015441790 | 77818   | T // G       | 0,001407201   | 0,009449458 | outlier | 0,021843  | 0,64871    | n.s.    | uncharacterized LOC107357143                                                                             |
| 2839  | AX-197962772  | Apop_00306     | NW_015441079 | 308590  | A // G       | 0,02114756    | 0,07045809  | n.s.    | 0,11205   | 0,00074698 | outlier | conserved oligomeric Golgi complex subunit 6-like                                                        |
| 16871 | AX-212317312  | Apop_09794     | NW_015441601 | 159196  | T // G       | 0,05861034    | 0,1396204   | n.s.    | 0,090585  | 0,0054459  | outlier | leucine-rich repeat serine/threonine-protein kinase 2-like                                               |
| 9418  | AX-212314058  | Apop_06574     | NW_015441211 | 553416  | A // C       | 3,28E-10      | 1,37E-08    | outlier | 0,096728  | 0,0016572  | outlier | DEP domain-containing mTOR-interacting protein-like%2C transcript variant X2                             |
| 5414  | AX-212302176  | Apop_07963     | NW_015441117 | 849244  | C // G       | 6,38E-16      | 7,88E-14    | outlier | 0,090363  | 0,0044379  | outlier | uncharacterized LOC107334569                                                                             |
| 6757  | AX-197963538  | Apop_00763     | NW_015441148 | 825248  | A // G       | 0,008348637   | 0,03678855  | n.s.    | 0,072904  | 0,026237   | outlier | uncharacterized GTP-binding protein C428.15-like                                                         |
| 9893  | AX-212293867  | AP_var_2520    | NW_015441225 | 4828    | C // G       | 0,001354972   | 0,009229635 | outlier | 0,087624  | 0,0021668  | outlier | helicase with zinc finger domain 2-like                                                                  |
| 6015  | AX-197963396  | Apop_00678     | NW_015441134 | 167324  | T // C       | 0,01257377    | 0,04997951  | n.s.    | 0,072865  | 0,046726   | outlier | ankyrin repeat domain-containing protein 11-like                                                         |
| 12826 | AX-197954642  | Afix_10694     | NW_015441352 | 30468   | T // C       | 9,08E-12      | 5,35E-10    | outlier | 0,12237   | 0,00043244 | outlier | prominin-1-A-like%2C transcript variant X4                                                               |
| 7141  | AX-212293135  | AP_var_1785    | NW_015441157 | 440741  | A // C       | 0,000547005   | 0,004353482 | outlier | 0,11621   | 0          | outlier | uncharacterized LOC107337495%2C transcript variant X1                                                    |

|       |              |             |              |        |        |             |             |         |          |            |         |                                                                                       |
|-------|--------------|-------------|--------------|--------|--------|-------------|-------------|---------|----------|------------|---------|---------------------------------------------------------------------------------------|
| 14353 | AX-198062528 | Apop_01767  | NW_015441414 | 116988 | T // G | 0,002283468 | 0,01398639  | n.s.    | 0,082787 | 0,0086398  | outlier | golgin subfamily B member 1-like                                                      |
| 15211 | AX-198062673 | Apop_01855  | NW_015441458 | 268008 | A // T | 0,00886776  | 0,03827198  | n.s.    | 0,080422 | 0,013757   | outlier | uncharacterized protein LOC107350536                                                  |
| 9424  | AX-212313978 | Apop_06493  | NW_015441211 | 573594 | C // G | 5,50E-11    | 2,63E-09    | outlier | 0,096424 | 0,0041239  | outlier | uncharacterized LOC107340839<br>uncharacterized LOC107329078%2C transcript variant X1 |
| 2834  | AX-197942725 | Afix_03183  | NW_015441079 | 230465 | C // G | 1,63E-06    | 2,80E-05    | outlier | 0,10398  | 0,0063428  | outlier | uncharacterized LOC107331054                                                          |
| 3078  | AX-212315134 | Apop_07633  | NW_015441082 | 399738 | A // G | 4,92E-07    | 9,66E-06    | outlier | 0,06103  | 0,10643    | n.s.    | ficolin-2-like                                                                        |
| 8974  | AX-212299455 | Apop_05256  | NW_015441198 | 506150 | T // C | 0,000205326 | 0,001960158 | outlier | 0,024281 | 0,51225    | n.s.    | E3 ubiquitin-protein ligase TRIM71-like                                               |
| 11786 | AX-198061918 | Apop_01385  | NW_015441302 | 474302 | T // C | 0,000161754 | 0,001633826 | outlier | 0,024961 | 0,45801    | n.s.    | uncharacterized LOC107349285                                                          |
| 14356 | AX-197965255 | Apop_01769  | NW_015441414 | 151827 | T // C | 0,001432063 | 0,009546159 | outlier | 0,020617 | 0,86789    | n.s.    | 1-acyl-sn-glycerol-3-phosphate acyltransferase epsilon-like                           |
| 9419  | AX-197964053 | Apop_01061  | NW_015441211 | 559139 | C // G | 0,006712988 | 0,03130137  | n.s.    | 0,096327 | 0,0019883  | outlier | transmembrane protein 145-like%2C transcript variant X3                               |
| 5454  | AX-198060637 | Apop_00589  | NW_015441119 | 309451 | A // G | 1,00E-06    | 1,83E-05    | outlier | 0,027295 | 0,44628    | n.s.    | uncharacterized LOC107344143                                                          |
| 11217 | AX-197981817 | Apop_02794  | NW_015441279 | 24878  | T // C | 0,000917557 | 0,006729044 | outlier | 0,080077 | 0,0050953  | outlier | uncharacterized protein LOC107344143                                                  |
| 11216 | AX-198078906 | Apop_02792  | NW_015441279 | 24492  | T // C | 3,18E-15    | 3,29E-13    | outlier | 0,076205 | 0,015204   | outlier | uncharacterized LOC107342486                                                          |
| 10244 | AX-212307289 | AP_var_2656 | NW_015441241 | 463614 | A // G | 0,000921481 | 0,006744896 | outlier | 0,021056 | 0,88236    | n.s.    | uncharacterized protein KIAA2026-like                                                 |
| 1646  | AX-212301670 | Apop_07457  | NW_015441067 | 135850 | A // G | 0,000458997 | 0,003786891 | outlier | 0,020472 | 0,88927    | n.s.    | cell wall protein DAN4-like%2C transcript variant X2                                  |
| 12186 | AX-212313246 | Apop_05749  | NW_015441314 | 365379 | A // T | 7,03E-06    | 0,000103178 | outlier | 0,068614 | 0,056356   | n.s.    | cap-specific mRNA (nucleoside-2'-O)-methyltransferase 1-like                          |
| 13028 | AX-197964984 | Apop_01603  | NW_015441361 | 133484 | T // G | 0,000486884 | 0,003982631 | outlier | 0,021459 | 0,80142    | n.s.    | uncharacterized LOC107347779%2C transcript variant X4                                 |
| 1744  | AX-198038047 | Afix_02239  | NW_015441068 | 851485 | T // C | 5,38E-05    | 0,000662296 | outlier | 0,033275 | 0,30913    | n.s.    | uncharacterized LOC107348149                                                          |
| 13780 | AX-197955661 | Afix_11350  | NW_015441378 | 132309 | T // C | 0,001040636 | 0,007363636 | outlier | 0,037634 | 0,2688     | n.s.    | acid-sensing ion channel 2-like                                                       |
| 17204 | AX-212317398 | Apop_09880  | NW_015441643 | 111668 | T // C | 0,000226991 | 0,002129799 | outlier | 0,022801 | 0,56625    | n.s.    | fez family zinc finger protein 2-like                                                 |
| 17936 | AX-197966028 | Apop_02230  | NW_015441751 | 139158 | A // G | 3,31E-08    | 8,85E-07    | outlier | 0,04883  | 0,12681    | n.s.    | cytochrome P450 27C1-like                                                             |
| 18663 | AX-197966176 | Apop_02310  | NW_015441902 | 34007  | T // C | 0,001565966 | 0,01017789  | n.s.    | 0,084142 | 0,023685   | outlier | ATP-binding cassette sub-family B member 10%2C mitochondrial-like                     |
| 4922  | AX-212315424 | Apop_07923  | NW_015441112 | 345084 | A // G | 1,13E-20    | 2,70E-18    | outlier | 0,11139  | 0,00030498 | outlier | uncharacterized LOC107344142                                                          |
| 11226 | AX-198078935 | Apop_02810  | NW_015441279 | 32437  | A // G | 1,09E-16    | 1,61E-14    | outlier | 0,079967 | 0,0061609  | outlier | LOW QUALITY PROTEIN: E3 ubiquitin-protein ligase HERC2-like                           |
| 10099 | AX-197964232 | Apop_01167  | NW_015441236 | 170492 | T // C | 0,02932777  | 0,0879871   | n.s.    | 0,074257 | 0,032288   | outlier | LOW QUALITY PROTEIN: E3 ubiquitin-protein ligase HERC2-like                           |
| 10101 | AX-197964235 | Apop_01169  | NW_015441236 | 176505 | A // G | 0,02932777  | 0,0879871   | n.s.    | 0,075398 | 0,029096   | outlier | uncharacterized protein LOC107344502 isoform X3                                       |
| 11471 | AX-212303167 | Apop_08937  | NW_015441288 | 423802 | T // C | 0,0162789   | 0,05884639  | n.s.    | 0,093918 | 0,0019883  | outlier | POU domain%2C class 4%2C transcription factor 3-like%2C transcript variant X1         |
| 8902  | AX-197981728 | Apop_02739  | NW_015441196 | 564510 | A // G | 8,45E-15    | 8,29E-13    | outlier | 0,11377  | 0,00013336 | outlier | #N/D                                                                                  |
| 12190 | AX-212316552 | Apop_09034  | NW_015441314 | 370782 | A // G | 9,98E-07    | 1,83E-05    | outlier | 0,059971 | 0,080508   | n.s.    | #N/D                                                                                  |
| 13302 | AX-212294962 | AP_var_3615 | NW_015441365 | 413826 | T // C | 4,53E-08    | 1,16E-06    | outlier | 0,053072 | 0,12307    | n.s.    | #N/D                                                                                  |

|       |              |             |              |                |             |             |         |          |            |         |                                                        |
|-------|--------------|-------------|--------------|----------------|-------------|-------------|---------|----------|------------|---------|--------------------------------------------------------|
| 6770  | AX-212302440 | Apop_08210  | NW_015441149 | 525123 C // G  | 6,92E-06    | 0,000101913 | outlier | 0,043946 | 0,1756     | n.s.    | #N/D                                                   |
| 15859 | AX-212298834 | Apop_04634  | NW_015441504 | 250034 A // G  | 0,01246089  | 0,04968995  | n.s.    | 0,07992  | 0,02405    | outlier | adhesion G-protein coupled receptor D1-like isoform X2 |
| 14564 | AX-197965303 | Apop_01799  | NW_015441430 | 189825 A // G  | 2,00E-20    | 4,26E-18    | outlier | 0,10666  | 0,00013336 | outlier | histamine H2 receptor-like                             |
| 18130 | AX-212317622 | Apop_10104  | NW_015441801 | 170807 A // G  | 5,07E-07    | 9,90E-06    | outlier | 0,056921 | 0,14489    | n.s.    | #N/D                                                   |
| 3344  | AX-212314397 | Apop_06913  | NW_015441088 | 1153437 C // G | 5,56E-08    | 1,36E-06    | outlier | 0,037801 | 0,20387    | n.s.    | #N/D                                                   |
| 13284 | AX-212294957 | AP_var_3610 | NW_015441364 | 428986 A // G  | 1,50E-05    | 0,000207655 | outlier | 0,074267 | 0,055844   | n.s.    | #N/D                                                   |
| 17756 | AX-212314304 | Apop_06820  | NW_015441714 | 82865 A // T   | 2,23E-06    | 3,69E-05    | outlier | 0,037978 | 0,22732    | n.s.    | #N/D                                                   |
| 10788 | AX-198061726 | Apop_01265  | NW_015441263 | 438209 T // C  | 2,03E-06    | 3,36E-05    | outlier | 0,045396 | 0,17148    | n.s.    | #N/D                                                   |
| 9447  | AX-197964062 | Apop_01067  | NW_015441213 | 122378 A // C  | 0,009746701 | 0,04141175  | n.s.    | 0,11263  | 0,00086359 | outlier | rap guanine nucleotide exchange factor 1-like          |
| 15882 | AX-212308991 | AP_var_4361 | NW_015441505 | 331751 A // G  | 1,67E-05    | 0,000229465 | outlier | 0,053273 | 0,11361    | n.s.    | #N/D                                                   |
| 10094 | AX-198078849 | Apop_02751  | NW_015441236 | 129054 A // T  | 2,29E-06    | 3,77E-05    | outlier | 0,03971  | 0,18226    | n.s.    | #N/D                                                   |
| 18306 | AX-212311673 | Apop_04187  | NW_015441838 | 49005 T // C   | 0,001373733 | 0,00932425  | outlier | 0,031694 | 0,29892    | n.s.    | #N/D                                                   |
| 11086 | AX-212303098 | Apop_08868  | NW_015441273 | 359766 T // C  | 4,78E-08    | 1,20E-06    | outlier | 0,028439 | 0,37036    | n.s.    | #N/D                                                   |
| 13788 | AX-197955671 | Afix_11358  | NW_015441378 | 157513 A // G  | 0,00149219  | 0,009798197 | outlier | 0,037958 | 0,26523    | n.s.    | #N/D                                                   |
| 13790 | AX-197955673 | Afix_11360  | NW_015441378 | 158804 A // G  | 0,001040636 | 0,007363636 | outlier | 0,038248 | 0,249      | n.s.    | #N/D                                                   |
| 15798 | AX-212303795 | Apop_09565  | NW_015441499 | 320129 A // G  | 0,000127542 | 0,001379246 | outlier | 0,022744 | 0,56928    | n.s.    | #N/D                                                   |
| 10274 | AX-212294026 | AP_var_2679 | NW_015441243 | 539471 A // T  | 0,000138181 | 0,0014859   | outlier | 0,030169 | 0,33427    | n.s.    | #N/D                                                   |
| 5426  | AX-212302181 | Apop_07968  | NW_015441118 | 253880 T // G  | 7,80E-05    | 0,000908529 | outlier | 0,024607 | 0,49894    | n.s.    | #N/D                                                   |
| 7900  | AX-212315940 | Apop_08422  | NW_015441171 | 143805 T // C  | 1,44E-05    | 0,000201684 | outlier | 0,024696 | 0,47944    | n.s.    | #N/D                                                   |
| 12434 | AX-198062093 | Apop_01486  | NW_015441326 | 202789 C // G  | 5,59E-05    | 0,00068387  | outlier | 0,026968 | 0,3778     | n.s.    | #N/D                                                   |
| 10298 | AX-212307336 | AP_var_2703 | NW_015441246 | 424203 T // C  | 0,001412257 | 0,009451669 | outlier | 0,033195 | 0,28856    | n.s.    | #N/D                                                   |
| 8372  | AX-212315988 | Apop_08470  | NW_015441183 | 327230 A // G  | 3,89E-05    | 0,000489999 | outlier | 0,028603 | 0,3965     | n.s.    | #N/D                                                   |
| 11798 | AX-198079040 | Apop_02868  | NW_015441302 | 486222 C // G  | 0,000161754 | 0,001633826 | outlier | 0,024833 | 0,47476    | n.s.    | #N/D                                                   |
| 10190 | AX-212316224 | Apop_08706  | NW_015441238 | 294911 A // C  | 7,27E-05    | 0,000852314 | outlier | 0,038055 | 0,21935    | n.s.    | #N/D                                                   |
| 698   | AX-212313209 | Apop_05712  | NW_015441058 | 660448 T // C  | 0,000179298 | 0,001787454 | outlier | 0,022182 | 0,60639    | n.s.    | #N/D                                                   |
| 8972  | AX-212306907 | AP_var_2274 | NW_015441198 | 497758 A // G  | 0,000208395 | 0,001982081 | outlier | 0,023089 | 0,58162    | n.s.    | #N/D                                                   |
| 11754 | AX-212307784 | AP_var_3151 | NW_015441300 | 397505 C // G  | 4,73E-05    | 0,00058768  | outlier | 0,022473 | 0,58371    | n.s.    | #N/D                                                   |
| 16578 | AX-212300879 | Apop_06682  | NW_015441569 | 103613 A // G  | 0,000187464 | 0,001854378 | outlier | 0,023272 | 0,5531     | n.s.    | #N/D                                                   |
| 8958  | AX-198061307 | Apop_00993  | NW_015441198 | 16327 T // C   | 5,77E-05    | 0,00069925  | outlier | 0,023211 | 0,53606    | n.s.    | #N/D                                                   |
| 12452 | AX-212294711 | AP_var_3364 | NW_015441326 | 300777 T // C  | 0,001435162 | 0,009546159 | outlier | 0,023463 | 0,53457    | n.s.    | #N/D                                                   |
| 4942  | AX-212305852 | AP_var_1216 | NW_015441112 | 787807 C // G  | 0,000999932 | 0,007195307 | outlier | 0,028334 | 0,3873     | n.s.    | #N/D                                                   |
| 18574 | AX-198058546 | Afix_14783  | NW_015441887 | 11273 A // T   | 0,001303175 | 0,00899809  | outlier | 0,026618 | 0,4176     | n.s.    | #N/D                                                   |
| 19158 | AX-212310311 | AP_var_5681 | NW_015442097 | 14158 T // C   | 0,001384948 | 0,009383736 | outlier | 0,021541 | 0,70006    | n.s.    | #N/D                                                   |
| 4805  | AX-198060551 | Apop_00537  | NW_015441108 | 892902 A // G  | 0,004734907 | 0,0240398   | n.s.    | 0,095838 | 0,0022612  | outlier | cartilage oligomeric matrix protein-like               |

|       |              |             |              |         |        |             |             |         |          |            |         |                                                                           |
|-------|--------------|-------------|--------------|---------|--------|-------------|-------------|---------|----------|------------|---------|---------------------------------------------------------------------------|
| 14478 | AX-212295321 | AP_var_3974 | NW_015441424 | 106457  | C // G | 5,15E-08    | 1,28E-06    | outlier | 0,10131  | 0,0010002  | outlier | uncharacterized LOC107349606%2C transcript variant X2                     |
| 152   | AX-198078294 | Apop_02393  | NW_015441057 | 1002677 | T // C | 2,23E-31    | 1,42E-28    | outlier | 0,15054  | 0          | outlier | #N/D                                                                      |
| 1052  | AX-212304785 | AP_var_0140 | NW_015441060 | 1297056 | T // G | 6,63E-11    | 3,07E-09    | outlier | 0,087974 | 0,0035228  | outlier | #N/D                                                                      |
| 5409  | AX-197963223 | Apop_00580  | NW_015441117 | 808845  | A // G | 0,004741424 | 0,024041    | n.s.    | 0,086707 | 0,0020764  | outlier | F-box/LRR-repeat protein 2-like                                           |
| 9407  | AX-198061406 | Apop_01055  | NW_015441211 | 476562  | T // C | 0,000705811 | 0,005393132 | outlier | 0,10796  | 0,0007104  | outlier | #N/D                                                                      |
| 16944 | AX-198063069 | Apop_02104  | NW_015441612 | 207259  | T // G | 3,97E-11    | 2,01E-09    | outlier | 0,07554  | 0,028742   | outlier | #N/D                                                                      |
| 147   | AX-197981178 | Apop_02399  | NW_015441057 | 975429  | T // C | 8,88E-05    | 0,001015233 | outlier | 0,13842  | 0          | outlier | #N/D                                                                      |
| 8907  | AX-197963923 | Apop_00988  | NW_015441196 | 583300  | T // C | 0,001926165 | 0,01218789  | n.s.    | 0,11557  | 0,00021823 | outlier | protein furry homolog-like                                                |
| 1416  | AX-197981195 | Apop_02408  | NW_015441063 | 1004465 | A // C | 1,67E-06    | 2,84E-05    | outlier | 0,075891 | 0,033704   | outlier | #N/D                                                                      |
| 5605  | AX-198078663 | Apop_02630  | NW_015441124 | 619081  | A // C | 0,02157988  | 0,07164903  | n.s.    | 0,077907 | 0,04252    | outlier | basement membrane-specific heparan sulfate proteoglycan core protein-like |
| 11264 | AX-197981808 | Apop_02789  | NW_015441279 | 233625  | A // T | 8,25E-13    | 5,85E-11    | outlier | 0,1371   | 0          | outlier | #N/D                                                                      |
| 15860 | AX-212311192 | Apop_03706  | NW_015441504 | 253276  | A // G | 6,06E-10    | 2,23E-08    | outlier | 0,072271 | 0,04588    | outlier | #N/D                                                                      |
| 10096 | AX-212299476 | Apop_05277  | NW_015441236 | 129666  | A // G | 1,39E-07    | 3,05E-06    | outlier | 0,070168 | 0,041291   | outlier | #N/D                                                                      |
| 10640 | AX-212316306 | Apop_08788  | NW_015441259 | 11979   | T // G | 4,03E-09    | 1,29E-07    | outlier | 0,08999  | 0,0038095  | outlier | #N/D                                                                      |
| 19650 | AX-212310656 | AP_var_6026 | NW_015442939 | 2281    | A // G | 4,02E-07    | 8,02E-06    | outlier | 0,057817 | 0,082239   | n.s.    | #N/D                                                                      |
| 16706 | AX-212297911 | Apop_03711  | NW_015441587 | 134642  | C // G | 1,08E-07    | 2,47E-06    | outlier | 0,053644 | 0,12157    | n.s.    | #N/D                                                                      |
| 11230 | AX-197981861 | Apop_02820  | NW_015441279 | 43692   | A // C | 7,25E-09    | 2,12E-07    | outlier | 0,046262 | 0,14336    | n.s.    | #N/D                                                                      |
| 11746 | AX-212316499 | Apop_08981  | NW_015441300 | 92786   | A // G | 2,83E-08    | 7,68E-07    | outlier | 0,040649 | 0,19478    | n.s.    | #N/D                                                                      |
| 4344  | AX-212302073 | Apop_07860  | NW_015441104 | 702995  | A // G | 5,59E-06    | 8,63E-05    | outlier | 0,041364 | 0,19146    | n.s.    | #N/D                                                                      |
| 4340  | AX-212302072 | Apop_07859  | NW_015441104 | 684750  | A // C | 6,28E-06    | 9,35E-05    | outlier | 0,040836 | 0,20633    | n.s.    | #N/D                                                                      |
| 17276 | AX-212309597 | AP_var_4967 | NW_015441650 | 33162   | T // C | 4,02E-08    | 1,04E-06    | outlier | 0,030715 | 0,32124    | n.s.    | #N/D                                                                      |
| 15952 | AX-212295725 | AP_var_4381 | NW_015441511 | 3564    | T // C | 9,42E-07    | 1,74E-05    | outlier | 0,037897 | 0,22574    | n.s.    | #N/D                                                                      |
| 10790 | AX-212303033 | Apop_08803  | NW_015441263 | 447531  | A // G | 1,46E-05    | 0,000202851 | outlier | 0,035218 | 0,28366    | n.s.    | #N/D                                                                      |
| 7734  | AX-212301194 | Apop_06997  | NW_015441169 | 185399  | T // C | 0,000886722 | 0,0065658   | outlier | 0,031319 | 0,3219     | n.s.    | #N/D                                                                      |
| 5422  | AX-197963231 | Apop_00584  | NW_015441118 | 130092  | A // C | 8,38E-06    | 0,000121988 | outlier | 0,036303 | 0,2336     | n.s.    | #N/D                                                                      |
| 9628  | AX-212298206 | Apop_04006  | NW_015441218 | 512200  | C // G | 2,91E-05    | 0,000376016 | outlier | 0,026202 | 0,4176     | n.s.    | #N/D                                                                      |
| 7732  | AX-212314479 | Apop_06995  | NW_015441169 | 153101  | A // G | 0,000808009 | 0,006076999 | outlier | 0,02733  | 0,39863    | n.s.    | #N/D                                                                      |
| 10226 | AX-197964275 | Apop_01194  | NW_015441240 | 466817  | T // C | 6,30E-06    | 9,35E-05    | outlier | 0,026412 | 0,42154    | n.s.    | #N/D                                                                      |
| 17444 | AX-212311414 | Apop_03928  | NW_015441663 | 4328    | A // G | 0,000927362 | 0,006762087 | outlier | 0,027804 | 0,3965     | n.s.    | #N/D                                                                      |
| 954   | AX-212312038 | Apop_04552  | NW_015441059 | 2074347 | A // C | 2,71E-08    | 7,41E-07    | outlier | 0,030949 | 0,3098     | n.s.    | #N/D                                                                      |
| 952   | AX-212300237 | Apop_06027  | NW_015441059 | 2072842 | T // G | 2,91E-06    | 4,73E-05    | outlier | 0,026859 | 0,39968    | n.s.    | #N/D                                                                      |
| 16354 | AX-212303896 | Apop_09666  | NW_015441544 | 289067  | C // G | 0,001405486 | 0,009449458 | outlier | 0,027239 | 0,39543    | n.s.    | #N/D                                                                      |
| 950   | AX-212311325 | Apop_03839  | NW_015441059 | 2069866 | A // G | 1,20E-05    | 0,000171368 | outlier | 0,025478 | 0,44089    | n.s.    | #N/D                                                                      |
| 13298 | AX-212303453 | Apop_09223  | NW_015441365 | 375272  | A // C | 0,00013342  | 0,001438746 | outlier | 0,024671 | 0,49106    | n.s.    | #N/D                                                                      |

|       |              |             |              |         |        |             |             |         |          |            |         |                                                                                                                                   |
|-------|--------------|-------------|--------------|---------|--------|-------------|-------------|---------|----------|------------|---------|-----------------------------------------------------------------------------------------------------------------------------------|
| 13620 | AX-212308301 | AP_var_3668 | NW_015441374 | 369986  | A // C | 9,48E-05    | 0,00107652  | outlier | 0,038746 | 0,21613    | n.s.    | #N/D                                                                                                                              |
| 11464 | AX-212294402 | AP_var_3055 | NW_015441287 | 186700  | T // G | 0,000300845 | 0,002684575 | outlier | 0,021886 | 0,64094    | n.s.    | #N/D                                                                                                                              |
| 16044 | AX-212317117 | Apop_09599  | NW_015441517 | 86395   | T // C | 3,47E-05    | 0,000438969 | outlier | 0,023809 | 0,54045    | n.s.    | #N/D                                                                                                                              |
| 6700  | AX-212300488 | Apop_06278  | NW_015441147 | 97513   | C // G | 0,000444211 | 0,00370482  | outlier | 0,021629 | 0,70006    | n.s.    | #N/D                                                                                                                              |
| 10548 | AX-197964352 | Apop_01241  | NW_015441254 | 370272  | A // C | 0,000637634 | 0,004921305 | outlier | 0,021869 | 0,64094    | n.s.    | #N/D                                                                                                                              |
| 19084 | AX-212317800 | Apop_10283  | NW_015442057 | 75620   | A // C | 0,000120859 | 0,001325694 | outlier | 0,021893 | 0,67702    | n.s.    | #N/D                                                                                                                              |
| 16122 | AX-212295784 | AP_var_4440 | NW_015441524 | 42830   | A // G | 0,001153996 | 0,008120752 | outlier | 0,024723 | 0,49575    | n.s.    | #N/D                                                                                                                              |
| 12501 | AX-197964840 | Apop_01508  | NW_015441330 | 427438  | T // C | 0,00269156  | 0,01582755  | n.s.    | 0,10196  | 0,00043244 | outlier | kinesin-like protein KIF16B                                                                                                       |
| 13224 | AX-212303435 | Apop_09205  | NW_015441364 | 46908   | T // C | 1,10E-07    | 2,49E-06    | outlier | 0,068876 | 0,040476   | outlier | #N/D                                                                                                                              |
| 16946 | AX-212304056 | Apop_09826  | NW_015441612 | 211737  | A // C | 3,97E-11    | 2,01E-09    | outlier | 0,079136 | 0,021471   | outlier | #N/D                                                                                                                              |
| 16043 | AX-212295757 | AP_var_4413 | NW_015441517 | 79755   | T // C | 5,65E-06    | 8,66E-05    | outlier | 0,18878  | 0          | outlier | #N/D                                                                                                                              |
| 6814  | AX-212293041 | AP_var_1691 | NW_015441151 | 333318  | C // G | 2,51E-10    | 1,07E-08    | outlier | 0,071377 | 0,02551    | outlier | #N/D                                                                                                                              |
| 19344 | AX-212297133 | AP_var_5789 | NW_015442220 | 11900   | A // G | 1,92E-07    | 4,00E-06    | outlier | 0,14493  | 0,00013336 | outlier | #N/D                                                                                                                              |
| 19599 | AX-212310621 | AP_var_5991 | NW_015442710 | 11711   | T // G | 0,000153155 | 0,001601923 | outlier | 0,11087  | 0          | outlier | #N/D                                                                                                                              |
| 6753  | AX-198060921 | Apop_00761  | NW_015441148 | 809728  | T // C | 0,03887172  | 0,1073586   | n.s.    | 0,074803 | 0,040072   | outlier | LIM/homeobox protein Lhx1-like                                                                                                    |
| 17406 | AX-197965879 | Apop_02144  | NW_015441658 | 15998   | A // T | 1,49E-06    | 2,59E-05    | outlier | 0,051172 | 0,13657    | n.s.    | #N/D                                                                                                                              |
| 14344 | AX-197965242 | Apop_01762  | NW_015441413 | 254569  | T // C | 2,01E-22    | 5,93E-20    | outlier | 0,10541  | 0,00043244 | outlier | #N/D                                                                                                                              |
| 15787 | AX-212303786 | Apop_09556  | NW_015441499 | 72805   | A // G | 0,001999489 | 0,01246641  | n.s.    | 0,090976 | 0,0012295  | outlier | ankyrin repeat domain-containing protein 49-like                                                                                  |
| 12139 | AX-198062006 | Apop_01432  | NW_015441313 | 389636  | T // C | 0,05686621  | 0,1368328   | n.s.    | 0,076705 | 0,031581   | outlier | protein SDA1 homolog                                                                                                              |
| 7954  | AX-212299947 | Apop_05737  | NW_015441175 | 389135  | A // T | 1,12E-07    | 2,52E-06    | outlier | 0,082272 | 0,0047596  | outlier | #N/D                                                                                                                              |
| 8903  | AX-197981729 | Apop_02740  | NW_015441196 | 565251  | T // C | 0,001926165 | 0,01218789  | n.s.    | 0,11656  | 0,00013336 | outlier | POU domain%2C class 4%2C transcription factor 3-like%2C transcript variant X1                                                     |
| 17986 | AX-212304297 | Apop_10067  | NW_015441773 | 4960    | T // C | 5,34E-28    | 2,27E-25    | outlier | 0,13441  | 0          | outlier | #N/D                                                                                                                              |
| 17899 | AX-212304263 | Apop_10033  | NW_015441740 | 125557  | A // T | 0,06560302  | 0,1504729   | n.s.    | 0,07491  | 0,048087   | outlier | exportin-6-like                                                                                                                   |
| 4799  | AX-212299849 | Apop_05639  | NW_015441108 | 866851  | T // G | 0,007414006 | 0,03354851  | n.s.    | 0,08705  | 0,01404    | outlier | uncharacterized LOC107333733                                                                                                      |
| 4797  | AX-212312068 | Apop_04582  | NW_015441108 | 857916  | A // T | 0,007414006 | 0,03354851  | n.s.    | 0,087904 | 0,011824   | outlier | uncharacterized LOC107333733                                                                                                      |
| 18044 | AX-212317597 | Apop_10079  | NW_015441785 | 98378   | A // G | 7,82E-19    | 1,50E-16    | outlier | 0,10899  | 0,00049869 | outlier | #N/D                                                                                                                              |
| 153   | AX-212301503 | Apop_07315  | NW_015441057 | 1006913 | T // C | 5,68E-06    | 8,66E-05    | outlier | 0,14074  | 0          | outlier | #N/D                                                                                                                              |
| 4801  | AX-212311825 | Apop_04339  | NW_015441108 | 870985  | T // C | 0,007414006 | 0,03354851  | n.s.    | 0,085612 | 0,015505   | outlier | uncharacterized LOC107333733                                                                                                      |
| 8051  | AX-212302662 | Apop_08432  | NW_015441177 | 20093   | T // G | 0,006483528 | 0,03056743  | n.s.    | 0,08123  | 0,016103   | outlier | alanine aminotransferase 2-like                                                                                                   |
| 8057  | AX-212306664 | AP_var_2031 | NW_015441177 | 445493  | C // G | 0,000570441 | 0,004521202 | outlier | 0,087013 | 0,0032475  | outlier | ribosome-recycling factor%2C mitochondrial-like muscle%2C skeletal receptor tyrosine protein kinase-like%2C transcript variant X2 |
| 15327 | AX-212311184 | Apop_03698  | NW_015441470 | 202362  | A // G | 0,000642499 | 0,004948881 | outlier | 0,12226  | 3,16E-05   | outlier | astacin-like metalloprotease toxin 1                                                                                              |
| 7272  | AX-212315844 | Apop_08326  | NW_015441160 | 285745  | A // G | 1,60E-06    | 2,76E-05    | outlier | 0,081815 | 0,018987   | outlier | kinesin-like protein KIF28P                                                                                                       |
| 1424  | AX-212300611 | Apop_06401  | NW_015441063 | 1216631 | T // C | 2,16E-11    | 1,16E-09    | outlier | 0,14753  | 0          | outlier | RNA-binding protein 24-like%2C transcript variant X5                                                                              |
| 11213 | AX-197981794 | Apop_02782  | NW_015441279 | 18268   | A // G | 0,009104115 | 0,03902806  | n.s.    | 0,070418 | 0,036644   | outlier | RNA-binding protein 24-like%2C transcript variant X5                                                                              |

|       |              |             |              |                |             |             |         |          |           |         |                                                                                                         |
|-------|--------------|-------------|--------------|----------------|-------------|-------------|---------|----------|-----------|---------|---------------------------------------------------------------------------------------------------------|
| 18836 | AX-197961457 | Afix_14975  | NW_015441976 | 63005 A // G   | 3,46E-07    | 6,99E-06    | outlier | 0,036276 | 0,24748   | n.s.    | leucine-rich repeat-containing G-protein coupled receptor 4-like                                        |
| 2788  | AX-198060176 | Apop_00297  | NW_015441078 | 817745 T // C  | 0,000764702 | 0,005808342 | outlier | 0,020674 | 0,88617   | n.s.    | CDK5 regulatory subunit-associated protein 3-like%2C transcript variant X1                              |
| 19210 | AX-212313206 | Apop_05709  | NW_015442130 | 11439 T // C   | 0,001278893 | 0,008853193 | outlier | 0,020663 | 0,88741   | n.s.    | HBS1-like protein                                                                                       |
| 18703 | AX-198063390 | Apop_02312  | NW_015441914 | 111855 A // G  | 0,03147884  | 0,09241264  | n.s.    | 0,075991 | 0,037777  | outlier | multiple epidermal growth factor-like domains protein 11 isoform X1                                     |
| 9966  | AX-198061533 | Apop_01136  | NW_015441226 | 212787 A // G  | 1,58E-14    | 1,51E-12    | outlier | 0,19595  | 0         | outlier | serine/threonine-protein kinase 33-like uncharacterized LOC107329179%2C transcript variant X3           |
| 19424 | AX-212297179 | AP_var_5835 | NW_015442297 | 45060 T // C   | 0,000536674 | 0,004307077 | outlier | 0,031797 | 0,33106   | n.s.    | chorion transcription factor Cf2-like                                                                   |
| 2928  | AX-197962769 | Apop_00304  | NW_015441079 | 1240224 A // G | 0,001309227 | 0,00899809  | outlier | 0,021285 | 0,72879   | n.s.    | sorcin-like                                                                                             |
| 2974  | AX-212292017 | AP_var_0658 | NW_015441081 | 323651 C // G  | 1,91E-07    | 4,00E-06    | outlier | 0,027021 | 0,37724   | n.s.    | uncharacterized LOC107331131%2C transcript variant X1                                                   |
| 696   | AX-197962331 | Apop_00044  | NW_015441058 | 654707 A // G  | 0,000179298 | 0,001787454 | outlier | 0,022782 | 0,60043   | n.s.    | chromodomain-helicase-DNA-binding protein 2-like                                                        |
| 3230  | AX-212315150 | Apop_07649  | NW_015441084 | 438047 A // G  | 0,000575669 | 0,004553212 | outlier | 0,023202 | 0,55392   | n.s.    | cyclic AMP-responsive element-binding protein 3-like protein 3-B%2C transcript variant X1               |
| 3232  | AX-212315152 | Apop_07651  | NW_015441084 | 481056 T // G  | 0,001008981 | 0,007242988 | outlier | 0,020632 | 0,86676   | n.s.    | serine-protein kinase ATM-like                                                                          |
| 3752  | AX-212315247 | Apop_07746  | NW_015441093 | 525597 T // C  | 6,30E-05    | 0,000753754 | outlier | 0,02377  | 0,51781   | n.s.    | E3 ubiquitin-protein ligase HECTD3-like                                                                 |
| 3880  | AX-198060398 | Apop_00437  | NW_015441095 | 398522 A // G  | 1,50E-05    | 0,000207655 | outlier | 0,022451 | 0,57544   | n.s.    | sodium/potassium/calcium exchanger 3-like%2C transcript variant X2                                      |
| 3936  | AX-197963003 | Apop_00445  | NW_015441096 | 5818 A // T    | 5,42E-06    | 8,41E-05    | outlier | 0,023214 | 0,57251   | n.s.    | FRAS1-related extracellular matrix protein 2-like uncharacterized LOC107333259%2C transcript variant X2 |
| 4106  | AX-212305619 | AP_var_0983 | NW_015441098 | 561168 A // G  | 4,49E-07    | 8,86E-06    | outlier | 0,064781 | 0,09319   | n.s.    | cartilage oligomeric matrix protein-like                                                                |
| 4258  | AX-212315350 | Apop_07849  | NW_015441103 | 973914 T // C  | 0,000970595 | 0,007010564 | outlier | 0,023189 | 0,54561   | n.s.    | MFS-type transporter SLC18B1-like                                                                       |
| 4806  | AX-212313533 | Apop_06036  | NW_015441108 | 897494 T // G  | 7,12E-05    | 0,000841647 | outlier | 0,023182 | 0,55392   | n.s.    | cartilage oligomeric matrix protein-like uncharacterized LOC107333792%2C transcript variant X5          |
| 16799 | AX-198063021 | Apop_02073  | NW_015441589 | 165791 A // T  | 0,01503708  | 0,05657141  | n.s.    | 0,088228 | 0,018328  | outlier | bone morphogenetic protein 2-A-like%2C transcript variant X2                                            |
| 4808  | AX-212297958 | Apop_03758  | NW_015441108 | 903330 T // G  | 7,12E-05    | 0,000841647 | outlier | 0,023044 | 0,54841   | n.s.    | uncharacterized LOC107335171                                                                            |
| 4812  | AX-212315406 | Apop_07905  | NW_015441108 | 1003680 A // G | 0,001309185 | 0,00899809  | outlier | 0,02171  | 0,62249   | n.s.    | multidrug resistance-associated protein 1-like                                                          |
| 4898  | AX-198060574 | Apop_00552  | NW_015441112 | 305931 T // C  | 5,95E-06    | 9,00E-05    | outlier | 0,030385 | 0,33936   | n.s.    | potassium voltage-gated channel subfamily H member 6-like%2C transcript variant X1                      |
| 978   | AX-212291493 | AP_var_0134 | NW_015441060 | 810542 T // C  | 6,04E-06    | 9,10E-05    | outlier | 0,029848 | 0,32651   | n.s.    | bifunctional glutamate/proline-tRNA ligase-like                                                         |
| 5672  | AX-212292741 | AP_var_1391 | NW_015441127 | 52538 A // G   | 6,34E-09    | 1,88E-07    | outlier | 0,049327 | 0,1253    | n.s.    | protein furry homolog-like                                                                              |
| 6134  | AX-198060815 | Apop_00691  | NW_015441136 | 896861 T // G  | 1,48E-06    | 2,58E-05    | outlier | 0,067337 | 0,058469  | n.s.    | probable RNA-binding protein 19%2C transcript variant X1                                                |
| 1162  | AX-212313369 | Apop_05872  | NW_015441061 | 1126240 T // C | 2,38E-09    | 7,84E-08    | outlier | 0,061271 | 0,064048  | n.s.    |                                                                                                         |
| 8905  | AX-198078837 | Apop_02743  | NW_015441196 | 578377 T // C  | 0,007717947 | 0,03460587  | n.s.    | 0,095333 | 0,0028709 | outlier |                                                                                                         |
| 6756  | AX-212302429 | Apop_08199  | NW_015441148 | 818007 C // G  | 1,09E-06    | 1,95E-05    | outlier | 0,028595 | 0,36451   | n.s.    |                                                                                                         |

|       |              |             |              |         |        |             |             |         |          |           |         |                                                                                            |
|-------|--------------|-------------|--------------|---------|--------|-------------|-------------|---------|----------|-----------|---------|--------------------------------------------------------------------------------------------|
| 7002  | AX-212298432 | Apop_04232  | NW_015441155 | 196820  | A // C | 5,43E-07    | 1,04E-05    | outlier | 0,029728 | 0,32519   | n.s.    | uncharacterized LOC107337339%2C transcript variant X1                                      |
| 18702 | AX-212304419 | Apop_10189  | NW_015441914 | 104335  | T // C | 7,35E-08    | 1,74E-06    | outlier | 0,075789 | 0,042925  | outlier | uncharacterized LOC107358661                                                               |
| 4798  | AX-212298783 | Apop_04583  | NW_015441108 | 865769  | A // C | 5,00E-11    | 2,42E-09    | outlier | 0,083921 | 0,017676  | outlier | uncharacterized LOC107333733                                                               |
| 4802  | AX-212313608 | Apop_06111  | NW_015441108 | 872768  | A // G | 1,47E-12    | 1,03E-10    | outlier | 0,10186  | 0,0012295 | outlier | uncharacterized LOC107333733                                                               |
| 7474  | AX-212306504 | AP_var_1868 | NW_015441163 | 456350  | T // G | 0,000270613 | 0,002454859 | outlier | 0,021805 | 0,63472   | n.s.    | transcription initiation factor IIB-like                                                   |
| 17436 | AX-212313348 | Apop_05851  | NW_015441662 | 98206   | T // C | 7,10E-09    | 2,09E-07    | outlier | 0,096154 | 0,034426  | outlier | E3 ubiquitin-protein ligase MARCH6-like                                                    |
| 7528  | AX-197963675 | Apop_00844  | NW_015441164 | 547812  | A // T | 3,47E-07    | 6,99E-06    | outlier | 0,054189 | 0,10786   | n.s.    | HEAT repeat-containing protein 6-like                                                      |
| 1286  | AX-197962477 | Apop_00135  | NW_015441062 | 738286  | A // G | 0,000109309 | 0,001216432 | outlier | 0,023494 | 0,53871   | n.s.    | A disintegrin and metalloproteinase with thrombospondin motifs 18-like                     |
| 1392  | AX-212314931 | Apop_07430  | NW_015441062 | 1306162 | A // G | 0,001209158 | 0,008416103 | outlier | 0,024602 | 0,49324   | n.s.    | DNA polymerase epsilon catalytic subunit A-like                                            |
| 7692  | AX-212315913 | Apop_08395  | NW_015441168 | 665928  | T // C | 0,000305801 | 0,002722456 | outlier | 0,030352 | 0,33555   | n.s.    | inactive tyrosine-protein kinase transmembrane receptor ROR1-like%2C transcript variant X1 |
| 7764  | AX-212315926 | Apop_08408  | NW_015441169 | 590252  | A // G | 1,82E-06    | 3,07E-05    | outlier | 0,029494 | 0,34063   | n.s.    | WD repeat-containing protein 1-A-like                                                      |
| 7964  | AX-212315949 | Apop_08431  | NW_015441176 | 284230  | T // C | 0,001434878 | 0,009546159 | outlier | 0,020335 | 0,88567   | n.s.    | myoferlin-like                                                                             |
| 8594  | AX-212306818 | AP_var_2185 | NW_015441190 | 239315  | A // G | 0,000877659 | 0,00652393  | outlier | 0,02094  | 0,84061   | n.s.    | TBC1 domain family member 22B-like                                                         |
| 13221 | AX-212316720 | Apop_09202  | NW_015441364 | 3975    | T // G | 0,03384689  | 0,09734899  | n.s.    | 0,06828  | 0,046726  | outlier | probable ubiquitin carboxyl-terminal hydrolase FAF-X                                       |
| 1428  | AX-212314334 | Apop_06850  | NW_015441063 | 1224375 | A // G | 0,000203379 | 0,00194642  | outlier | 0,076578 | 0,074687  | n.s.    | kinesin-like protein KIF28P                                                                |
| 1482  | AX-212312333 | Apop_04848  | NW_015441063 | 1618684 | A // T | 0,000144989 | 0,001541786 | outlier | 0,025101 | 0,46756   | n.s.    | granulins-like                                                                             |
| 9290  | AX-198061377 | Apop_01036  | NW_015441207 | 691116  | A // G | 5,13E-09    | 1,56E-07    | outlier | 0,041222 | 0,20469   | n.s.    | zinc transporter 2-like                                                                    |
| 13223 | AX-212316722 | Apop_09204  | NW_015441364 | 33014   | C // G | 0,03384689  | 0,09734899  | n.s.    | 0,068114 | 0,04946   | outlier | probable ubiquitin carboxyl-terminal hydrolase FAF-X                                       |
| 10062 | AX-212302909 | Apop_08679  | NW_015441233 | 338060  | A // G | 0,001025296 | 0,007314654 | outlier | 0,024006 | 0,53308   | n.s.    | fibrocystin-L-like                                                                         |
| 10110 | AX-198061596 | Apop_01176  | NW_015441236 | 450295  | T // C | 8,46E-06    | 0,000122642 | outlier | 0,025391 | 0,43445   | n.s.    | cathepsin O-like                                                                           |
| 716   | AX-212304699 | AP_var_0054 | NW_015441058 | 1122310 | T // C | 0,000956042 | 0,006931604 | outlier | 0,092029 | 0,037398  | outlier | polypeptide N-acetylgalactosaminyltransferase 2-like                                       |
| 10118 | AX-212302929 | Apop_08699  | NW_015441237 | 181733  | T // C | 5,72E-06    | 8,68E-05    | outlier | 0,02435  | 0,49964   | n.s.    | uncharacterized LOC107342233                                                               |
| 10506 | AX-197964332 | Apop_01228  | NW_015441253 | 122477  | C // G | 5,05E-05    | 0,000624202 | outlier | 0,059262 | 0,11719   | n.s.    | frizzled-4-like                                                                            |
| 10608 | AX-212307437 | AP_var_2804 | NW_015441256 | 459334  | C // G | 0,000431033 | 0,003618563 | outlier | 0,022146 | 0,60105   | n.s.    | EF-hand calcium-binding domain-containing protein 6-like                                   |
| 11082 | AX-198061801 | Apop_01314  | NW_015441273 | 233235  | C // G | 0,000455113 | 0,003762953 | outlier | 0,021303 | 0,86551   | n.s.    | epithelial splicing regulatory protein 1-like                                              |
| 11210 | AX-198078883 | Apop_02778  | NW_015441279 | 17008   | A // G | 1,09E-16    | 1,61E-14    | outlier | 0,08022  | 0,0072874 | outlier | RNA-binding protein 24-like%2C transcript variant X5                                       |
| 11212 | AX-197981793 | Apop_02781  | NW_015441279 | 17768   | A // G | 8,37E-10    | 2,99E-08    | outlier | 0,059687 | 0,079935  | n.s.    | RNA-binding protein 24-like%2C transcript variant X5                                       |
| 17618 | AX-212296432 | AP_var_5088 | NW_015441698 | 19095   | A // G | 0,000519103 | 0,004192429 | outlier | 0,084422 | 0,01238   | outlier | transient receptor potential cation channel subfamily A member 1-like                      |
| 11356 | AX-212316428 | Apop_08910  | NW_015441279 | 461364  | A // G | 3,83E-09    | 1,23E-07    | outlier | 0,066779 | 0,078201  | n.s.    | uncharacterized LOC107344204                                                               |

|       |              |             |              |               |             |             |         |          |            |         |                                                                                                                                                           |
|-------|--------------|-------------|--------------|---------------|-------------|-------------|---------|----------|------------|---------|-----------------------------------------------------------------------------------------------------------------------------------------------------------|
| 11394 | AX-198061859 | Apop_01351  | NW_015441280 | 372492 T // C | 0,000151197 | 0,001590131 | outlier | 0,040131 | 0,22335    | n.s.    | uncharacterized LOC107344225                                                                                                                              |
| 12905 | AX-212316662 | Apop_09144  | NW_015441353 | 382885 A // C | 3,00E-39    | 5,74E-36    | outlier | 0,31008  | 0          | outlier | tumor necrosis factor receptor superfamily member 16-like, transcript variant X2                                                                          |
| 1652  | AX-212314962 | Apop_07461  | NW_015441067 | 180627 T // C | 0,000246057 | 0,002275233 | outlier | 0,020643 | 0,88932    | n.s.    | vinculin-like                                                                                                                                             |
| 10074 | AX-212316203 | Apop_08685  | NW_015441234 | 20888 C // G  | 2,59E-05    | 0,000341459 | outlier | 0,026225 | 0,40699    | n.s.    | phospholipase B-like 1                                                                                                                                    |
| 18572 | AX-198058578 | Afix_14802  | NW_015441887 | 3699 T // C   | 0,000805232 | 0,006068033 | outlier | 0,027289 | 0,40179    | n.s.    | UDP-glucuronic acid decarboxylase 1-like                                                                                                                  |
| 14814 | AX-212316979 | Apop_09461  | NW_015441439 | 372460 A // G | 7,49E-10    | 2,73E-08    | outlier | 0,070914 | 0,073502   | n.s.    | uncharacterized LOC107349989                                                                                                                              |
| 17974 | AX-212296515 | AP_var_5171 | NW_015441767 | 133946 A // T | 6,67E-06    | 9,86E-05    | outlier | 0,021479 | 0,67702    | n.s.    | uncharacterized LOC107356830                                                                                                                              |
| 19426 | AX-197958124 | Afix_12928  | NW_015442298 | 49123 T // C  | 0,000549229 | 0,004362113 | outlier | 0,020869 | 0,88193    | n.s.    | microtubule-actin cross-linking factor 1-like                                                                                                             |
| 7674  | AX-212315910 | Apop_08392  | NW_015441168 | 463088 T // C | 3,20E-05    | 0,000409338 | outlier | 0,023987 | 0,51846    | n.s.    | tubulin polyglutamylase TTL7-like<br>sushi%2C von Willebrand factor type A%2C EGF and pentraxin domain-containing protein 1-like%2C transcript variant X1 |
| 11782 | AX-198079006 | Apop_02849  | NW_015441302 | 467158 C // G | 0,000161754 | 0,001633826 | outlier | 0,024433 | 0,49179    | n.s.    | patatin-like phospholipase domain-containing protein 7                                                                                                    |
| 12416 | AX-198062082 | Apop_01479  | NW_015441324 | 214139 A // G | 4,50E-06    | 7,14E-05    | outlier | 0,036311 | 0,23593    | n.s.    | phosphate carrier protein%2C mitochondrial-like                                                                                                           |
| 17934 | AX-197966025 | Apop_02228  | NW_015441751 | 125379 T // C | 1,47E-08    | 4,21E-07    | outlier | 0,059413 | 0,077038   | n.s.    | uncharacterized LOC107345109                                                                                                                              |
| 1686  | AX-212314966 | Apop_07465  | NW_015441067 | 818850 C // G | 1,33E-09    | 4,61E-08    | outlier | 0,041046 | 0,21855    | n.s.    | prominin-1-A-like isoform X1                                                                                                                              |
| 12825 | AX-197938643 | Afix_00587  | NW_015441352 | 30216 A // G  | 0,004430687 | 0,02298293  | n.s.    | 0,087482 | 0,0036621  | outlier | leucine-tRNA ligase, cytoplasmic-like                                                                                                                     |
| 16571 | AX-212313652 | Apop_06155  | NW_015441569 | 47572 A // G  | 2,25E-08    | 6,25E-07    | outlier | 0,14785  | 0          | outlier | kinesin-like protein KIF16B                                                                                                                               |
| 12500 | AX-212312378 | Apop_04893  | NW_015441330 | 422240 A // C | 0,000784106 | 0,005932191 | outlier | 0,028448 | 0,36034    | n.s.    | early endosome antigen 1-like%2C transcript variant X5                                                                                                    |
| 12488 | AX-197964831 | Apop_01503  | NW_015441330 | 150971 C // G | 0,000611381 | 0,004776467 | outlier | 0,022005 | 0,61955    | n.s.    | fibroblast growth factor receptor 3-like                                                                                                                  |
| 16975 | AX-212312304 | Apop_04819  | NW_015441618 | 251815 A // G | 0,02865449  | 0,08664621  | n.s.    | 0,080415 | 0,017361   | outlier | uncharacterized LOC107347339%2C transcript variant X2                                                                                                     |
| 12426 | AX-212305005 | AP_var_0360 | NW_015441325 | 365185 T // C | 0,000155798 | 0,001625119 | outlier | 0,021607 | 0,82425    | n.s.    | protein FAM65B-like                                                                                                                                       |
| 11260 | AX-212316423 | Apop_08905  | NW_015441279 | 219768 A // G | 2,53E-12    | 1,70E-10    | outlier | 0,13424  | 0          | outlier | uncharacterized LOC107348149                                                                                                                              |
| 13784 | AX-197955665 | Afix_11353  | NW_015441378 | 138745 A // C | 0,001040636 | 0,007363636 | outlier | 0,037321 | 0,25722    | n.s.    | adhesion G-protein coupled receptor D1-like%2C transcript variant X1                                                                                      |
| 19205 | AX-212314099 | Apop_06615  | NW_015442124 | 32540 A // C  | 0,01357767  | 0,05255567  | n.s.    | 0,073977 | 0,04376    | outlier | fibulin-1-like                                                                                                                                            |
| 1854  | AX-212305032 | AP_var_0387 | NW_015441069 | 460889 C // G | 0,0003744   | 0,003199254 | outlier | 0,023678 | 0,55119    | n.s.    | dehydrogenase/reductase SDR family member 7-like%2C transcript variant X1                                                                                 |
| 14306 | AX-212316911 | Apop_09393  | NW_015441409 | 334414 T // G | 0,00012365  | 0,001344751 | outlier | 0,058721 | 0,14034    | n.s.    | exocyst complex component 3-like                                                                                                                          |
| 14530 | AX-212303661 | Apop_09431  | NW_015441428 | 345729 T // C | 3,15E-09    | 1,02E-07    | outlier | 0,046888 | 0,14795    | n.s.    | putative beta-lactamase-like 1                                                                                                                            |
| 15212 | AX-198062675 | Apop_01856  | NW_015441458 | 302868 T // C | 5,63E-05    | 0,000686996 | outlier | 0,022242 | 0,6252     | n.s.    | uncharacterized LOC107350829%2C transcript variant X1                                                                                                     |
| 15320 | AX-198062713 | Apop_01878  | NW_015441469 | 37944 T // C  | 0,000146382 | 0,001547996 | outlier | 0,02133  | 0,8722     | n.s.    | transcription factor 4-like                                                                                                                               |
| 16395 | AX-198062917 | Apop_02006  | NW_015441549 | 234133 T // C | 0,000627617 | 0,004875491 | outlier | 0,103    | 0,00045226 | outlier | uncharacterized LOC107350829%2C transcript variant X1                                                                                                     |
| 15318 | AX-198062712 | Apop_01877  | NW_015441469 | 32348 A // G  | 0,000146382 | 0,001547996 | outlier | 0,021144 | 0,87389    | n.s.    |                                                                                                                                                           |

|       |              |             |              |                |             |             |         |          |            |         |                                                                                                         |
|-------|--------------|-------------|--------------|----------------|-------------|-------------|---------|----------|------------|---------|---------------------------------------------------------------------------------------------------------|
| 18720 | AX-212304426 | Apop_10196  | NW_015441923 | 61746 A // G   | 5,78E-08    | 1,40E-06    | outlier | 0,083043 | 0,03969    | outlier | EGF and laminin G domain-containing protein-like                                                        |
| 15796 | AX-212303794 | Apop_09564  | NW_015441499 | 216349 A // T  | 3,50E-08    | 9,24E-07    | outlier | 0,052869 | 0,12831    | n.s.    | transcription factor E2F4-like                                                                          |
| 18028 | AX-212303782 | Apop_09552  | NW_015441783 | 38448 T // C   | 0,000202916 | 0,00194642  | outlier | 0,021215 | 0,88617    | n.s.    | uncharacterized protein PB18E9.04c-like                                                                 |
| 15806 | AX-197965519 | Apop_01929  | NW_015441501 | 48268 A // G   | 0,000445815 | 0,003710115 | outlier | 0,069516 | 0,094957   | n.s.    | probable protein phosphatase 2C T23F11.1                                                                |
| 15864 | AX-212299900 | Apop_05690  | NW_015441504 | 282089 T // G  | 0,000930315 | 0,006770724 | outlier | 0,023867 | 0,54103    | n.s.    | adhesion G-protein coupled receptor G2-like                                                             |
| 14629 | AX-197956569 | Afix_11969  | NW_015441435 | 232323 A // T  | 0,002907476 | 0,01681314  | n.s.    | 0,098173 | 0,0010514  | outlier | prominin-2-like                                                                                         |
| 3574  | AX-212315229 | Apop_07728  | NW_015441091 | 502331 T // C  | 2,37E-17    | 4,33E-15    | outlier | 0,091335 | 0,0026496  | outlier | polycystic kidney disease 1-related protein transformation/transcription domain-associated protein-like |
| 16256 | AX-197965600 | Apop_01982  | NW_015441536 | 96580 T // C   | 0,000602383 | 0,004715791 | outlier | 0,021847 | 0,84061    | n.s.    | uncharacterized LOC107352748                                                                            |
| 2182  | AX-212301719 | Apop_07506  | NW_015441072 | 323585 T // C  | 1,30E-05    | 0,0001846   | outlier | 0,036703 | 0,24058    | n.s.    | adhesion G-protein coupled receptor D1-like%2C transcript variant X1                                    |
| 19206 | AX-212297485 | Apop_03285  | NW_015442124 | 34184 T // C   | 4,03E-10    | 1,57E-08    | outlier | 0,07829  | 0,0266     | outlier | GTPase-activating Rap/Ran-GAP domain-like protein 3                                                     |
| 16560 | AX-212303950 | Apop_09720  | NW_015441567 | 114729 C // G  | 0,000926011 | 0,006762087 | outlier | 0,0215   | 0,83257    | n.s.    | tolloid-like protein 2                                                                                  |
| 16608 | AX-212295993 | AP_var_4649 | NW_015441572 | 220214 A // C  | 1,14E-07    | 2,56E-06    | outlier | 0,027929 | 0,35491    | n.s.    | uncharacterized LOC107353541%2C transcript variant X2                                                   |
| 16668 | AX-212317262 | Apop_09744  | NW_015441579 | 168933 A // C  | 0,000297699 | 0,002662715 | outlier | 0,020668 | 0,87309    | n.s.    | nucleoporin NDC1-like%2C transcript variant X1                                                          |
| 16694 | AX-212296046 | AP_var_4702 | NW_015441584 | 254288 C // G  | 0,000279504 | 0,002523555 | outlier | 0,043668 | 0,16736    | n.s.    | sperm receptor for egg jelly-like                                                                       |
| 14320 | AX-212316915 | Apop_09397  | NW_015441411 | 61967 A // G   | 5,47E-10    | 2,07E-08    | outlier | 0,10455  | 0,00021823 | outlier | uncharacterized LOC107353948                                                                            |
| 16864 | AX-197965766 | Apop_02083  | NW_015441599 | 127776 A // G  | 0,000313519 | 0,002771831 | outlier | 0,021148 | 0,87555    | n.s.    | aquaporin-5-like                                                                                        |
| 17046 | AX-212317367 | Apop_09849  | NW_015441625 | 148197 A // G  | 1,87E-05    | 0,000256174 | outlier | 0,042824 | 0,17312    | n.s.    | uncharacterized LOC107354539                                                                            |
| 17118 | AX-212317379 | Apop_09861  | NW_015441631 | 128770 A // T  | 0,0002851   | 0,002568026 | outlier | 0,024059 | 0,53247    | n.s.    | adhesion G-protein coupled receptor D1-like%2C transcript variant X2                                    |
| 15853 | AX-212312393 | Apop_04908  | NW_015441504 | 203048 A // G  | 0,01246089  | 0,04968995  | n.s.    | 0,078753 | 0,022949   | outlier | HEAT repeat-containing protein 6-like                                                                   |
| 7527  | AX-198061051 | Apop_00843  | NW_015441164 | 546048 A // G  | 0,01536972  | 0,05724318  | n.s.    | 0,072141 | 0,037016   | outlier | putative ammonium transporter 3%2C transcript variant X1                                                |
| 17798 | AX-198063216 | Apop_02199  | NW_015441725 | 133557 A // T  | 3,47E-05    | 0,000438969 | outlier | 0,022067 | 0,60456    | n.s.    | gamma-aminobutyric acid type B receptor subunit 2-like%2C transcript variant X3                         |
| 4774  | AX-212315389 | Apop_07888  | NW_015441108 | 416183 A // C  | 7,81E-10    | 2,82E-08    | outlier | 0,074481 | 0,041702   | outlier | sulfotransferase 1C4-like                                                                               |
| 17900 | AX-198063242 | Apop_02216  | NW_015441742 | 48356 A // T   | 8,14E-05    | 0,00094128  | outlier | 0,021065 | 0,82756    | n.s.    | uncharacterized LOC107357306                                                                            |
| 18124 | AX-212304330 | Apop_10100  | NW_015441801 | 65947 A // G   | 6,00E-10    | 2,23E-08    | outlier | 0,068485 | 0,065818   | n.s.    | uncharacterized LOC107357440                                                                            |
| 18178 | AX-212298029 | Apop_03829  | NW_015441812 | 124867 A // G  | 0,000183545 | 0,001825042 | outlier | 0,022163 | 0,60209    | n.s.    | uncharacterized LOC107337495%2C transcript variant X2                                                   |
| 7140  | AX-212302512 | Apop_08282  | NW_015441157 | 435968 C // G  | 1,55E-15    | 1,80E-13    | outlier | 0,1043   | 0,00021823 | outlier | uncharacterized LOC107327218                                                                            |
| 18838 | AX-212317740 | Apop_10223  | NW_015441976 | 90319 A // T   | 0,000510176 | 0,004137789 | outlier | 0,021091 | 0,88537    | n.s.    | uncharacterized LOC107339563                                                                            |
| 1394  | AX-212314932 | Apop_07431  | NW_015441062 | 1346253 T // C | 0,000110257 | 0,001223428 | outlier | 0,020804 | 0,85977    | n.s.    | multidrug resistance-associated protein 1-like                                                          |
| 10812 | AX-212312775 | Apop_05289  | NW_015441265 | 13904 T // C   | 4,74E-06    | 7,44E-05    | outlier | 0,024196 | 0,5045     | n.s.    | uncharacterized LOC107346133%2C transcript variant X4                                                   |
| 12450 | AX-212307996 | AP_var_3363 | NW_015441326 | 291774 A // G  | 3,76E-08    | 9,80E-07    | outlier | 0,046215 | 0,16158    | n.s.    |                                                                                                         |

|       |              |             |              |         |        |             |             |         |          |            |         |                                                                                                |
|-------|--------------|-------------|--------------|---------|--------|-------------|-------------|---------|----------|------------|---------|------------------------------------------------------------------------------------------------|
| 1862  | AX-212305038 | AP_var_0393 | NW_015441069 | 632762  | A // T | 0,000911802 | 0,006725486 | outlier | 0,022126 | 0,63917    | n.s.    | allene oxide synthase-lipoxygenase protein-like                                                |
| 14246 | AX-198062492 | Apop_01747  | NW_015441408 | 153571  | T // C | 0,000991442 | 0,007147655 | outlier | 0,020972 | 0,84296    | n.s.    | uncharacterized LOC107349101                                                                   |
| 1904  | AX-198038158 | Afix_02308  | NW_015441069 | 1292211 | A // G | 0,000333638 | 0,002886725 | outlier | 0,021232 | 0,76894    | n.s.    | octopamine receptor 1-like%2C transcript variant X3                                            |
| 1902  | AX-198038156 | Afix_02307  | NW_015441069 | 1291372 | A // G | 0,000333638 | 0,002886725 | outlier | 0,021376 | 0,84945    | n.s.    | octopamine receptor 1-like%2C transcript variant X3                                            |
| 12012 | AX-198061980 | Apop_01418  | NW_015441307 | 472343  | A // G | 0,001326746 | 0,00908587  | outlier | 0,025437 | 0,47594    | n.s.    | #N/D                                                                                           |
| 5640  | AX-197963280 | Apop_00614  | NW_015441126 | 281548  | A // C | 4,60E-12    | 2,89E-10    | outlier | 0,096795 | 0,0013651  | outlier | transient receptor potential cation channel subfamily A member 1-like%2C transcript variant X3 |
| 9425  | AX-212310718 | Apop_03232  | NW_015441211 | 574303  | A // T | 0,006712988 | 0,03130137  | n.s.    | 0,097134 | 0,0031115  | outlier | uncharacterized protein LOC107340839                                                           |
| 15854 | AX-212298916 | Apop_04716  | NW_015441504 | 207032  | A // G | 4,03E-10    | 1,57E-08    | outlier | 0,078824 | 0,033343   | outlier | adhesion G-protein coupled receptor D1-like%2C transcript variant X9                           |
| 15858 | AX-212299899 | Apop_05689  | NW_015441504 | 249868  | T // C | 4,03E-10    | 1,57E-08    | outlier | 0,078263 | 0,030877   | outlier | adhesion G-protein coupled receptor D1-like%2C transcript variant X9                           |
| 15856 | AX-212300637 | Apop_06439  | NW_015441504 | 234182  | C // G | 4,60E-09    | 1,44E-07    | outlier | 0,074555 | 0,042112   | outlier | adhesion G-protein coupled receptor D1-like%2C transcript variant X9                           |
| 18770 | AX-197966200 | Apop_02323  | NW_015441949 | 114812  | A // C | 2,69E-06    | 4,38E-05    | outlier | 0,023847 | 0,50655    | n.s.    | pantothenate kinase 4-like                                                                     |
| 4088  | AX-198060418 | Apop_00451  | NW_015441097 | 1056888 | T // C | 0,000106631 | 0,001190089 | outlier | 0,03428  | 0,27518    | n.s.    | uncharacterized protein LOC107332647                                                           |
| 4306  | AX-212315354 | Apop_07853  | NW_015441104 | 351285  | T // G | 0,000152947 | 0,001601923 | outlier | 0,027729 | 0,3949     | n.s.    | ephrin-B2a-like isoform X1                                                                     |
| 4312  | AX-198060493 | Apop_00500  | NW_015441104 | 559898  | A // G | 1,66E-06    | 2,83E-05    | outlier | 0,02533  | 0,44225    | n.s.    | lipopolysaccharide-induced tumor necrosis factor-alpha factor homolog                          |
| 11454 | AX-198061868 | Apop_01358  | NW_015441285 | 422104  | A // C | 1,02E-06    | 1,85E-05    | outlier | 0,10022  | 0,044183   | outlier | thyroid receptor-interacting protein 11-like%2C transcript variant X2                          |
| 16396 | AX-212317201 | Apop_09683  | NW_015441549 | 244391  | T // C | 9,96E-22    | 2,72E-19    | outlier | 0,1095   | 0,00025867 | outlier | transcription factor 12-like                                                                   |
| 7144  | AX-212293136 | AP_var_1786 | NW_015441157 | 464680  | A // G | 1,26E-20    | 2,84E-18    | outlier | 0,13412  | 0          | outlier | uncharacterized LOC107337462                                                                   |
| 1390  | AX-198078313 | Apop_02405  | NW_015441062 | 1295211 | A // T | 0,001209158 | 0,008416103 | outlier | 0,024243 | 0,52038    | n.s.    | DNA polymerase epsilon catalytic subunit A-like                                                |
| 1384  | AX-198059881 | Apop_00118  | NW_015441062 | 1273232 | A // C | 0,00120785  | 0,008416103 | outlier | 0,023268 | 0,53096    | n.s.    | golgin subfamily A member 4-like                                                               |
| 10098 | AX-197964230 | Apop_01166  | NW_015441236 | 153074  | A // G | 0,00130828  | 0,00899809  | outlier | 0,022481 | 0,59726    | n.s.    | CUB and sushi domain-containing protein 1-like                                                 |
| 10514 | AX-198061681 | Apop_01236  | NW_015441253 | 163719  | A // T | 0,000171291 | 0,001716571 | outlier | 0,050248 | 0,16239    | n.s.    | uncharacterized protein LOC107343009                                                           |
| 10822 | AX-212294232 | AP_var_2885 | NW_015441265 | 256850  | A // G | 1,89E-05    | 0,000257739 | outlier | 0,065917 | 0,095551   | n.s.    | rap1 GTPase-activating protein 2-like                                                          |
| 16397 | AX-197965641 | Apop_02007  | NW_015441549 | 245728  | C // G | 0,008436644 | 0,03703769  | n.s.    | 0,07534  | 0,023318   | outlier | transcription factor 12-like                                                                   |
| 11784 | AX-197981915 | Apop_02852  | NW_015441302 | 473374  | A // T | 0,000212306 | 0,002011735 | outlier | 0,023224 | 0,54841    | n.s.    | E3 ubiquitin-protein ligase TRIM71-like                                                        |
| 8898  | AX-197981714 | Apop_02732  | NW_015441196 | 554973  | T // C | 3,69E-12    | 2,35E-10    | outlier | 0,086479 | 0,0092556  | outlier | uncharacterized LOC107339948                                                                   |
| 12954 | AX-198062264 | Apop_01596  | NW_015441355 | 255868  | T // G | 0,0005947   | 0,004665187 | outlier | 0,025528 | 0,47634    | n.s.    | uncharacterized protein LOC107347239                                                           |
| 16574 | AX-198062487 | Apop_01744  | NW_015441569 | 96827   | A // G | 5,29E-12    | 3,27E-10    | outlier | 0,068707 | 0,055339   | n.s.    | uncharacterized LOC107348982                                                                   |
| 10039 | AX-212293908 | AP_var_2561 | NW_015441230 | 523223  | A // G | 0,004724068 | 0,02401662  | n.s.    | 0,11063  | 6,67E-05   | outlier | #N/D                                                                                           |
| 16840 | AX-198051718 | Afix_10666  | NW_015441598 | 109569  | T // G | 1,54E-07    | 3,30E-06    | outlier | 0,04954  | 0,14109    | n.s.    | kelch-like protein diablo                                                                      |
| 18168 | AX-197966095 | Apop_02267  | NW_015441809 | 158744  | T // C | 7,80E-08    | 1,83E-06    | outlier | 0,027576 | 0,37724    | n.s.    | probable ATP-dependent helicase PF08_0048                                                      |

|       |              |             |              |         |        |             |             |         |          |            |         |                                                                                                                        |
|-------|--------------|-------------|--------------|---------|--------|-------------|-------------|---------|----------|------------|---------|------------------------------------------------------------------------------------------------------------------------|
| 18436 | AX-197966144 | Apop_02293  | NW_015441856 | 14368   | A // G | 2,19E-05    | 0,000296094 | outlier | 0,031675 | 0,30642    | n.s.    | LOW QUALITY PROTEIN: uncharacterized protein<br>LOC107358039                                                           |
| 18704 | AX-197966182 | Apop_02313  | NW_015441914 | 142444  | A // T | 0,000334055 | 0,002886725 | outlier | 0,023552 | 0,54219    | n.s.    | uncharacterized protein LOC107358670                                                                                   |
| 10815 | AX-212301258 | Apop_07061  | NW_015441265 | 85587   | T // G | 0,002994062 | 0,01723574  | n.s.    | 0,11596  | 6,67E-05   | outlier | #N/D                                                                                                                   |
| 4782  | AX-197963147 | Apop_00533  | NW_015441108 | 467950  | A // T | 0,001467067 | 0,009699784 | outlier | 0,020482 | 0,88416    | n.s.    | cartilage oligomeric matrix protein-like                                                                               |
| 16508 | AX-198062948 | Apop_02027  | NW_015441561 | 105670  | A // C | 2,64E-07    | 5,38E-06    | outlier | 0,034003 | 0,27589    | n.s.    | #N/D                                                                                                                   |
| 19077 | AX-197966246 | Apop_02347  | NW_015442053 | 88733   | T // G | 0,02204423  | 0,07300083  | n.s.    | 0,08761  | 0,0061609  | outlier | #N/D                                                                                                                   |
| 16001 | AX-198062845 | Apop_01958  | NW_015441516 | 9052    | T // C | 0,0170652   | 0,06082721  | n.s.    | 0,078931 | 0,012933   | outlier | #N/D                                                                                                                   |
| 5606  | AX-198078664 | Apop_02631  | NW_015441124 | 619782  | T // G | 5,38E-08    | 1,32E-06    | outlier | 0,05383  | 0,11073    | n.s.    | basement membrane-specific heparan sulfate<br>proteoglycan core protein-like                                           |
| 9458  | AX-197964070 | Apop_01072  | NW_015441214 | 33995   | T // C | 0,000755614 | 0,005762181 | outlier | 0,020434 | 0,88759    | n.s.    | ADP-ribosyl cyclase/cyclic ADP-ribose hydrolase-like                                                                   |
| 13739 | AX-212303513 | Apop_09283  | NW_015441377 | 153490  | A // G | 0,004902527 | 0,02463116  | n.s.    | 0,089763 | 0,013485   | outlier | #N/D                                                                                                                   |
| 13736 | AX-212308310 | AP_var_3677 | NW_015441377 | 52798   | T // G | 0,00018532  | 0,001837915 | outlier | 0,02959  | 0,34189    | n.s.    | uncharacterized LOC107350302                                                                                           |
| 14021 | AX-212299968 | Apop_05758  | NW_015441389 | 398790  | T // C | 0,01246089  | 0,04968995  | n.s.    | 0,078267 | 0,028385   | outlier | #N/D                                                                                                                   |
| 9212  | AX-212316073 | Apop_08555  | NW_015441206 | 576036  | C // G | 0,00088006  | 0,0065291   | outlier | 0,070742 | 0,043343   | outlier | uncharacterized LOC107340492                                                                                           |
| 7422  | AX-198039684 | Afix_03262  | NW_015441162 | 610666  | A // G | 4,98E-09    | 1,54E-07    | outlier | 0,081801 | 0,01321    | outlier | uncharacterized protein LOC107337856                                                                                   |
| 19110 | AX-198063451 | Apop_02352  | NW_015442074 | 60506   | T // C | 2,06E-31    | 1,42E-28    | outlier | 0,10791  | 3,16E-05   | outlier | uncharacterized protein LOC107328041                                                                                   |
| 14354 | AX-198062530 | Apop_01768  | NW_015441414 | 124105  | A // C | 2,28E-14    | 2,03E-12    | outlier | 0,081095 | 0,010994   | outlier | golgin subfamily B member 1-like                                                                                       |
| 7420  | AX-212306497 | AP_var_1861 | NW_015441162 | 599413  | C // G | 3,41E-08    | 9,07E-07    | outlier | 0,070872 | 0,047175   | outlier | putative aminopeptidase W07G4.4                                                                                        |
| 150   | AX-197962311 | Apop_00032  | NW_015441057 | 990159  | A // G | 6,97E-30    | 3,34E-27    | outlier | 0,14242  | 0          | outlier | uncharacterized protein LOC107357903                                                                                   |
| 4804  | AX-198060550 | Apop_00536  | NW_015441108 | 884786  | C // G | 2,08E-11    | 1,14E-09    | outlier | 0,087147 | 0,011546   | outlier | uncharacterized protein LOC107333733                                                                                   |
| 12398 | AX-212307974 | AP_var_3341 | NW_015441323 | 276867  | T // C | 1,14E-09    | 4,04E-08    | outlier | 0,10363  | 0,0084315  | outlier | major facilitator superfamily domain-containing<br>protein 12-like                                                     |
| 2846  | AX-197962775 | Apop_00308  | NW_015441079 | 436535  | T // C | 1,81E-16    | 2,47E-14    | outlier | 0,14777  | 0          | outlier | uncharacterized protein LOC107329195 isoform X2                                                                        |
| 11229 | AX-197964070 | Apop_01072  | NW_015441279 | 33995   | T // C | 0,00118145  | 0,008283491 | outlier | 0,077531 | 0,010213   | outlier | ADP-ribosyl cyclase/cyclic ADP-ribose hydrolase-like                                                                   |
| 7310  | AX-198061009 | Apop_00816  | NW_015441161 | 339133  | A // G | 1,04E-13    | 8,69E-12    | outlier | 0,11407  | 0,0005812  | outlier | protein KTI12 homolog                                                                                                  |
| 14340 | AX-197965240 | Apop_01761  | NW_015441413 | 206838  | T // C | 2,41E-15    | 2,64E-13    | outlier | 0,09845  | 0,001579   | outlier | uncharacterized protein LOC107349266 isoform X1                                                                        |
| 1493  | AX-212291613 | AP_var_0254 | NW_015441064 | 1323058 | A // G | 0,02026556  | 0,06823213  | n.s.    | 0,1036   | 0,0005812  | outlier | #N/D                                                                                                                   |
| 17465 | AX-212304156 | Apop_09926  | NW_015441665 | 219233  | A // C | 0,002528228 | 0,01507551  | n.s.    | 0,1198   | 3,16E-05   | outlier | #N/D                                                                                                                   |
| 10041 | AX-212307195 | AP_var_2562 | NW_015441230 | 530855  | C // G | 0,01563572  | 0,0578759   | n.s.    | 0,082306 | 0,0090504  | outlier | #N/D                                                                                                                   |
| 5404  | AX-197963214 | Apop_00575  | NW_015441117 | 722866  | A // G | 4,11E-11    | 2,01E-09    | outlier | 0,072168 | 0,027317   | outlier | protein phosphatase 1D-like<br>mitochondrial amidoxime reducing component 2-like<br>isoform X2                         |
| 12901 | AX-198062238 | Apop_01580  | NW_015441353 | 350801  | A // G | 4,39E-10    | 1,70E-08    | outlier | 0,22371  | 0          | outlier |                                                                                                                        |
| 17596 | AX-198063182 | Apop_02177  | NW_015441695 | 155086  | T // C | 4,48E-09    | 1,42E-07    | outlier | 0,078884 | 0,017044   | outlier | probable ubiquitin carboxyl-terminal hydrolase FAF-X<br>LOW QUALITY PROTEIN: E3 ubiquitin-protein ligase<br>HERC2-like |
| 10100 | AX-198061583 | Apop_01168  | NW_015441236 | 174152  | A // G | 4,96E-08    | 1,24E-06    | outlier | 0,076381 | 0,021845   | outlier |                                                                                                                        |
| 5994  | AX-198060785 | Apop_00673  | NW_015441133 | 814755  | A // G | 1,32E-25    | 4,59E-23    | outlier | 0,10205  | 0,00064487 | outlier | protocadherin-like protein                                                                                             |

|       |              |             |              |                |             |                     |          |                    |                                                                                                            |
|-------|--------------|-------------|--------------|----------------|-------------|---------------------|----------|--------------------|------------------------------------------------------------------------------------------------------------|
| 15866 | AX-212313511 | Apop_06014  | NW_015441504 | 287819 A // G  | 4,03E-10    | 1,57E-08 outlier    | 0,077378 | 0,02945 outlier    | adhesion G-protein coupled receptor G2-like<br>LOW QUALITY PROTEIN: AP-1 complex subunit gamma-1-like      |
| 15794 | AX-212303792 | Apop_09562  | NW_015441499 | 172789 T // C  | 3,52E-17    | 6,13E-15 outlier    | 0,095947 | 0,00064487 outlier |                                                                                                            |
| 11272 | AX-197964542 | Apop_01345  | NW_015441279 | 244375 A // G  | 8,01E-13    | 5,78E-11 outlier    | 0,13503  | 0 outlier          | solute carrier family 22 member 15-like isoform X2                                                         |
| 11278 | AX-198078913 | Apop_02797  | NW_015441279 | 260525 T // C  | 8,01E-13    | 5,78E-11 outlier    | 0,13713  | 0 outlier          | solute carrier family 22 member 15-like isoform X2                                                         |
| 5408  | AX-198060619 | Apop_00579  | NW_015441117 | 808655 A // G  | 4,11E-11    | 2,01E-09 outlier    | 0,073594 | 0,024416 outlier   | F-box/LRR-repeat protein 2-like                                                                            |
| 5410  | AX-197963225 | Apop_00581  | NW_015441117 | 809276 T // C  | 1,13E-10    | 5,09E-09 outlier    | 0,069537 | 0,03969 outlier    | F-box/LRR-repeat protein 2-like                                                                            |
| 2906  | AX-212311091 | Apop_03605  | NW_015441079 | 1112357 T // G | 0,000293919 | 0,002635063 outlier | 0,021626 | 0,67148 n.s.       | peroxisome biogenesis factor 1-like                                                                        |
| 3270  | AX-197962856 | Apop_00360  | NW_015441085 | 402145 C // G  | 0,000167988 | 0,001692331 outlier | 0,021562 | 0,72879 n.s.       | PR domain zinc finger protein 14-like<br>tartrate-resistant acid phosphatase type 5-like isoform X2        |
| 3308  | AX-197962868 | Apop_00367  | NW_015441087 | 274693 T // C  | 4,79E-06    | 7,49E-05 outlier    | 0,024461 | 0,50347 n.s.       |                                                                                                            |
| 8906  | AX-197963921 | Apop_00987  | NW_015441196 | 578853 C // G  | 8,45E-15    | 8,29E-13 outlier    | 0,11485  | 0,00013336 outlier | protein furry homolog-like<br>LOW QUALITY PROTEIN: serine-protein kinase ATM-like                          |
| 3750  | AX-212305532 | AP_var_0896 | NW_015441093 | 508321 C // G  | 2,92E-05    | 0,000376016 outlier | 0,026286 | 0,41108 n.s.       |                                                                                                            |
| 3748  | AX-197962952 | Apop_00414  | NW_015441093 | 477948 T // C  | 0,00013924  | 0,001488918 outlier | 0,023013 | 0,57974 n.s.       | involucrin-like isoform X1                                                                                 |
| 4056  | AX-198060431 | Apop_00458  | NW_015441097 | 89909 C // G   | 0,000104372 | 0,001168284 outlier | 0,030767 | 0,33363 n.s.       | uncharacterized protein LOC107332625                                                                       |
| 4058  | AX-198060433 | Apop_00459  | NW_015441097 | 95715 T // C   | 0,000259349 | 0,002380888 outlier | 0,023815 | 0,5191 n.s.        | uncharacterized protein LOC107332625                                                                       |
| 19307 | AX-212297124 | AP_var_5780 | NW_015442204 | 48206 A // G   | 0,01908261  | 0,06551693 n.s.     | 0,092301 | 0,010994 outlier   | uncharacterized LOC107328743                                                                               |
| 4152  | AX-198060454 | Apop_00474  | NW_015441100 | 254722 A // T  | 1,42E-05    | 0,000199461 outlier | 0,028721 | 0,37209 n.s.       | homeobox protein GBX-2-like isoform X2                                                                     |
| 4158  | AX-198060459 | Apop_00478  | NW_015441100 | 555051 A // G  | 0,000138989 | 0,001488918 outlier | 0,022258 | 0,62158 n.s.       | zinc transporter Slc39a7-like                                                                              |
| 4380  | AX-212302079 | Apop_07866  | NW_015441104 | 855381 T // G  | 7,28E-05    | 0,000852314 outlier | 0,02596  | 0,46428 n.s.       | melanopsin-like                                                                                            |
| 4314  | AX-197963093 | Apop_00502  | NW_015441104 | 571242 A // G  | 7,81E-05    | 0,000908529 outlier | 0,028357 | 0,38564 n.s.       | anion exchange protein 2-like                                                                              |
| 4576  | AX-198060531 | Apop_00524  | NW_015441106 | 64359 T // G   | 1,48E-07    | 3,21E-06 outlier    | 0,051756 | 0,13281 n.s.       | acyl-coenzyme A thioesterase 11-like                                                                       |
| 4574  | AX-197963128 | Apop_00523  | NW_015441106 | 52937 A // G   | 6,62E-07    | 1,26E-05 outlier    | 0,044156 | 0,1723 n.s.        | UPF0759 protein YunF-like isoform X2                                                                       |
| 4780  | AX-197981516 | Apop_02611  | NW_015441108 | 427451 T // C  | 8,89E-07    | 1,66E-05 outlier    | 0,036921 | 0,26523 n.s.       | microfibrillar-associated protein 1-like                                                                   |
| 4118  | AX-198060434 | Apop_00460  | NW_015441098 | 1004157 T // C | 5,42E-09    | 1,63E-07 outlier    | 0,079264 | 0,022949 outlier   | protein saal1-like<br>phthiocerol synthesis polyketide synthase type I PpsC-like                           |
| 4842  | AX-198060565 | Apop_00547  | NW_015441110 | 840170 T // C  | 0,000514863 | 0,004166979 outlier | 0,02466  | 0,50722 n.s.       |                                                                                                            |
| 5110  | AX-212292589 | AP_var_1239 | NW_015441114 | 326189 A // G  | 0,000267513 | 0,002438295 outlier | 0,023117 | 0,5531 n.s.        | uncharacterized protein LOC107334247                                                                       |
| 5124  | AX-212302164 | Apop_07951  | NW_015441115 | 228378 A // C  | 0,000196811 | 0,001936826 outlier | 0,023547 | 0,54925 n.s.       | disks large homolog 1-like                                                                                 |
| 5995  | AX-212302303 | Apop_08090  | NW_015441133 | 858542 A // T  | 2,48E-06    | 4,06E-05 outlier    | 0,11473  | 0 outlier          | protocadherin-like protein                                                                                 |
| 5652  | AX-198060695 | Apop_00622  | NW_015441126 | 486992 A // G  | 1,90E-09    | 6,45E-08 outlier    | 0,027567 | 0,38175 n.s.       | WD repeat-containing protein 36-like<br>FGGY carbohydrate kinase domain-containing protein-like isoform X1 |
| 5648  | AX-198060689 | Apop_00619  | NW_015441126 | 393217 T // C  | 5,36E-08    | 1,32E-06 outlier    | 0,055646 | 0,12456 n.s.       | potassium voltage-gated channel subfamily H member 7-like                                                  |
| 6136  | AX-198060819 | Apop_00693  | NW_015441136 | 903063 C // G  | 0,000358895 | 0,003080513 outlier | 0,026647 | 0,40021 n.s.       |                                                                                                            |
| 14413 | AX-212295289 | AP_var_3942 | NW_015441418 | 348961 C // G  | 0,02184985  | 0,07248252 n.s.     | 0,084605 | 0,020368 outlier   | uncharacterized LOC107349419                                                                               |
| 6734  | AX-197963530 | Apop_00758  | NW_015441148 | 729055 A // T  | 2,09E-08    | 5,88E-07 outlier    | 0,061588 | 0,085708 n.s.      | protein unc-93 homolog A-like                                                                              |

|       |              |             |              |                |             |             |         |          |           |         |                                                                                                     |
|-------|--------------|-------------|--------------|----------------|-------------|-------------|---------|----------|-----------|---------|-----------------------------------------------------------------------------------------------------|
| 15785 | AX-212303784 | Apop_09554  | NW_015441499 | 55101 C // G   | 0,001999489 | 0,01246641  | n.s.    | 0,091317 | 0,0010002 | outlier | uncharacterized protein PB18E9.04c-like                                                             |
| 4800  | AX-212298300 | Apop_04100  | NW_015441108 | 870486 T // C  | 2,08E-11    | 1,14E-09    | outlier | 0,087523 | 0,014324  | outlier | uncharacterized protein LOC107333733                                                                |
| 6812  | AX-212315746 | Apop_08228  | NW_015441151 | 220752 A // C  | 2,09E-08    | 5,88E-07    | outlier | 0,037689 | 0,20881   | n.s.    | mu-type opioid receptor-like<br>LOW QUALITY PROTEIN: AP-2 complex subunit alpha-2-like              |
| 7130  | AX-198060980 | Apop_00798  | NW_015441157 | 14621 A // G   | 0,000245868 | 0,002275233 | outlier | 0,02258  | 0,58255   | n.s.    | like                                                                                                |
| 7138  | AX-212293132 | AP_var_1782 | NW_015441157 | 253307 T // G  | 6,26E-08    | 1,51E-06    | outlier | 0,055253 | 0,10363   | n.s.    | serine-rich adhesin for platelets-like isoform X3                                                   |
| 7270  | AX-212315842 | Apop_08324  | NW_015441160 | 261580 T // C  | 5,12E-07    | 9,91E-06    | outlier | 0,07004  | 0,053348  | n.s.    | annexin A6-like                                                                                     |
| 7476  | AX-197963665 | Apop_00837  | NW_015441163 | 470719 T // C  | 0,000307531 | 0,002731511 | outlier | 0,022064 | 0,63303   | n.s.    | kinesin-like protein KIF14                                                                          |
| 13865 | AX-198062401 | Apop_01688  | NW_015441379 | 114441 A // G  | 8,23E-07    | 1,55E-05    | outlier | 0,15389  | 0         | outlier | CCR4-NOT transcription complex subunit 1-like                                                       |
| 9414  | AX-197964047 | Apop_01058  | NW_015441211 | 550174 A // G  | 1,18E-11    | 6,72E-10    | outlier | 0,09697  | 0,0029896 | outlier | protein yippee-like 2 isoform X2                                                                    |
| 7460  | AX-212306503 | AP_var_1867 | NW_015441163 | 310902 T // C  | 0,00086075  | 0,006448323 | outlier | 0,03454  | 0,29273   | n.s.    | spliceosome RNA helicase Ddx39b                                                                     |
| 7676  | AX-198061091 | Apop_00867  | NW_015441168 | 480392 A // G  | 0,000198781 | 0,00194642  | outlier | 0,024709 | 0,48923   | n.s.    | uncharacterized protein LOC107338309 isoform X3                                                     |
| 8370  | AX-197963848 | Apop_00943  | NW_015441183 | 272527 A // G  | 0,000314373 | 0,002772974 | outlier | 0,024586 | 0,52913   | n.s.    | uncharacterized protein LOC107339244<br>Down syndrome cell adhesion molecule-like protein 1 homolog |
| 8976  | AX-212293622 | AP_var_2275 | NW_015441198 | 529598 T // C  | 8,49E-05    | 0,000979269 | outlier | 0,0225   | 0,57808   | n.s.    | homolog                                                                                             |
| 1472  | AX-212312472 | Apop_04986  | NW_015441063 | 1341949 C // G | 0,000203379 | 0,00194642  | outlier | 0,076261 | 0,074096  | n.s.    | uncharacterized protein LOC107340032                                                                |
| 1440  | AX-212314340 | Apop_06856  | NW_015441063 | 1258402 T // G | 0,000203379 | 0,00194642  | outlier | 0,080045 | 0,063467  | n.s.    | uncharacterized protein LOC107340588                                                                |
| 1476  | AX-212299205 | Apop_05006  | NW_015441063 | 1369267 T // C | 0,000203379 | 0,00194642  | outlier | 0,075139 | 0,08282   | n.s.    | uncharacterized protein LOC107340661                                                                |
| 1474  | AX-212312490 | Apop_05004  | NW_015441063 | 1368664 C // G | 0,000203379 | 0,00194642  | outlier | 0,074057 | 0,087426  | n.s.    | uncharacterized protein LOC107340661                                                                |
| 1478  | AX-212312494 | Apop_05008  | NW_015441063 | 1369414 T // C | 0,000271865 | 0,002460387 | outlier | 0,063406 | 0,11433   | n.s.    | uncharacterized protein LOC107340661                                                                |
| 9518  | AX-212293784 | AP_var_2437 | NW_015441215 | 130118 A // C  | 0,000323164 | 0,00283775  | outlier | 0,021782 | 0,65591   | n.s.    | arylsulfatase H-like                                                                                |
| 9638  | AX-212302849 | Apop_08619  | NW_015441219 | 173862 T // G  | 1,51E-06    | 2,61E-05    | outlier | 0,037681 | 0,27801   | n.s.    | DNA repair protein REV1-like                                                                        |
| 9964  | AX-212298563 | Apop_04363  | NW_015441226 | 197980 T // C  | 1,94E-07    | 4,00E-06    | outlier | 0,11195  | 0,0018189 | outlier | CCR4-NOT transcription complex subunit 2-like                                                       |
| 9676  | AX-197964123 | Apop_01103  | NW_015441222 | 192844 A // G  | 0,001436351 | 0,009546159 | outlier | 0,020253 | 0,88987   | n.s.    | importin-7-like                                                                                     |
| 9670  | AX-212302858 | Apop_08628  | NW_015441222 | 65461 A // G   | 0,000449575 | 0,003733291 | outlier | 0,021068 | 0,84061   | n.s.    | centromere-associated protein E-like                                                                |
| 10508 | AX-197964334 | Apop_01230  | NW_015441253 | 123707 T // C  | 5,05E-05    | 0,000624202 | outlier | 0,061185 | 0,11647   | n.s.    | frizzled-4-like                                                                                     |
| 10842 | AX-197964413 | Apop_01276  | NW_015441267 | 291352 T // C  | 0,00010208  | 0,001145978 | outlier | 0,023015 | 0,55036   | n.s.    | tumor protein p63-regulated gene 1-like protein                                                     |
| 10984 | AX-198061793 | Apop_01309  | NW_015441272 | 68971 A // G   | 0,00053644  | 0,004307077 | outlier | 0,022171 | 0,61484   | n.s.    | beta-mannosidase-like                                                                               |
| 11227 | AX-198078939 | Apop_02812  | NW_015441279 | 32929 C // G   | 0,002675024 | 0,01575452  | n.s.    | 0,070896 | 0,022216  | outlier | uncharacterized protein LOC107344142                                                                |
| 11078 | AX-197964482 | Apop_01312  | NW_015441273 | 219997 T // C  | 0,000159014 | 0,001633826 | outlier | 0,023118 | 0,54219   | n.s.    | uncharacterized protein LOC107343867                                                                |
| 11084 | AX-212316383 | Apop_08865  | NW_015441273 | 245187 A // G  | 0,000455113 | 0,003762953 | outlier | 0,021057 | 0,86419   | n.s.    | epithelial splicing regulatory protein 1-like                                                       |
| 11794 | AX-197981930 | Apop_02862  | NW_015441302 | 480895 T // C  | 0,000161754 | 0,001633826 | outlier | 0,024756 | 0,49033   | n.s.    | E3 ubiquitin-protein ligase TRIM71-like                                                             |
| 11170 | AX-198061820 | Apop_01326  | NW_015441277 | 469588 A // T  | 1,25E-11    | 7,05E-10    | outlier | 0,076434 | 0,018659  | outlier | stimulated by retinoic acid gene 6 protein homolog                                                  |
| 11792 | AX-212303219 | Apop_08989  | NW_015441302 | 479377 A // G  | 0,000240629 | 0,002235844 | outlier | 0,024631 | 0,49894   | n.s.    | E3 ubiquitin-protein ligase TRIM71-like                                                             |
| 11900 | AX-198061922 | Apop_01387  | NW_015441303 | 259429 T // C  | 0,001404864 | 0,009449458 | outlier | 0,021108 | 0,76894   | n.s.    | UHRF1-binding protein 1-like                                                                        |
| 12008 | AX-197964664 | Apop_01414  | NW_015441307 | 458765 T // C  | 0,000392318 | 0,00333746  | outlier | 0,02779  | 0,39915   | n.s.    | polycystic kidney disease protein 1-like 2                                                          |

|       |              |             |              |         |        |             |             |         |          |          |         |                                                                   |
|-------|--------------|-------------|--------------|---------|--------|-------------|-------------|---------|----------|----------|---------|-------------------------------------------------------------------|
| 12188 | AX-212300269 | Apop_06059  | NW_015441314 | 366949  | C // G | 0,000438438 | 0,003664655 | outlier | 0,064922 | 0,093778 | n.s.    | cell wall protein DAN4-like isoform X2                            |
| 12654 | AX-197964878 | Apop_01534  | NW_015441337 | 414193  | T // C | 1,29E-07    | 2,85E-06    | outlier | 0,027566 | 0,40699  | n.s.    | inhibitor of nuclear factor kappa-B kinase subunit alpha-like     |
| 12732 | AX-212303362 | Apop_09132  | NW_015441347 | 8143    | A // G | 0,000482176 | 0,003952564 | outlier | 0,022106 | 0,58417  | n.s.    | tuberin-like                                                      |
| 376   | AX-198059710 | Apop_00012  | NW_015441057 | 1628659 | T // C | 0,000418818 | 0,003531509 | outlier | 0,022193 | 0,63803  | n.s.    | uncharacterized protein LOC107346978 isoform X2                   |
| 12828 | AX-197964944 | Apop_01576  | NW_015441352 | 33321   | A // G | 1,14E-06    | 2,03E-05    | outlier | 0,039999 | 0,20716  | n.s.    | two pore potassium channel protein sup-9-like                     |
| 12922 | AX-198062249 | Apop_01586  | NW_015441354 | 124140  | T // C | 3,37E-05    | 0,000429005 | outlier | 0,023112 | 0,56524  | n.s.    | transcriptional regulator Myc-B-like                              |
| 12952 | AX-197964970 | Apop_01594  | NW_015441355 | 242451  | A // G | 0,000403503 | 0,003425    | outlier | 0,027143 | 0,41561  | n.s.    | uncharacterized protein LOC107347266                              |
| 13088 | AX-212308226 | AP_var_3593 | NW_015441362 | 293866  | A // G | 0,000287655 | 0,00258495  | outlier | 0,022243 | 0,58939  | n.s.    | collagen alpha-4(VI) chain-like                                   |
| 13800 | AX-198062399 | Apop_01686  | NW_015441378 | 215132  | T // C | 0,00087048  | 0,006495794 | outlier | 0,022038 | 0,69176  | n.s.    | U1 small nuclear ribonucleoprotein 70 kDa-like                    |
| 13782 | AX-197938701 | Afix_00627  | NW_015441378 | 133682  | A // C | 0,001040636 | 0,007363636 | outlier | 0,037394 | 0,26016  | n.s.    | uncharacterized protein LOC107348149                              |
| 13868 | AX-197965127 | Apop_01690  | NW_015441379 | 236047  | A // T | 4,48E-05    | 0,000560351 | outlier | 0,025559 | 0,45674  | n.s.    | tyrosine aminotransferase-like                                    |
| 14062 | AX-212303567 | Apop_09337  | NW_015441395 | 222031  | A // G | 0,001339129 | 0,009149608 | outlier | 0,02059  | 0,88759  | n.s.    | uncharacterized LOC107348698                                      |
| 14058 | AX-212316853 | Apop_09335  | NW_015441395 | 174121  | A // G | 0,000592458 | 0,004657136 | outlier | 0,02084  | 0,8894   | n.s.    | uncharacterized protein LOC107348725 isoform X2                   |
| 2847  | AX-197962777 | Apop_00309  | NW_015441079 | 444425  | A // G | 0,002263656 | 0,01393191  | n.s.    | 0,14709  | 0        | outlier | uncharacterized protein LOC107328618                              |
| 14196 | AX-198062483 | Apop_01741  | NW_015441404 | 247864  | A // G | 0,000363461 | 0,003112729 | outlier | 0,022027 | 0,60456  | n.s.    | methyltransferase-like protein 9                                  |
| 14192 | AX-198062481 | Apop_01739  | NW_015441404 | 113290  | T // G | 0,000415512 | 0,003511366 | outlier | 0,021739 | 0,65957  | n.s.    | uncharacterized protein LOC107348982 isoform X3                   |
| 14198 | AX-212303612 | Apop_09382  | NW_015441404 | 270750  | T // C | 3,70E-06    | 5,92E-05    | outlier | 0,027711 | 0,37324  | n.s.    | interferon-inducible GTPase 1-like                                |
| 14332 | AX-212295241 | AP_var_3894 | NW_015441411 | 261314  | T // C | 7,58E-06    | 0,000110776 | outlier | 0,026497 | 0,41511  | n.s.    | monocarboxylate transporter 10-like                               |
| 14624 | AX-212308637 | AP_var_4004 | NW_015441435 | 153906  | T // C | 5,09E-07    | 9,90E-06    | outlier | 0,029344 | 0,35124  | n.s.    | transmembrane anterior posterior transformation protein 1 homolog |
| 6710  | AX-212292986 | AP_var_1636 | NW_015441148 | 13483   | A // T | 4,36E-08    | 1,12E-06    | outlier | 0,081681 | 0,014608 | outlier | centromere protein F-like                                         |
| 11280 | AX-197981827 | Apop_02799  | NW_015441279 | 265897  | C // G | 1,55E-10    | 6,80E-09    | outlier | 0,12572  | 6,67E-05 | outlier | organic cation transporter protein-like                           |
| 14710 | AX-197965324 | Apop_01812  | NW_015441438 | 166874  | A // G | 0,000169207 | 0,001700141 | outlier | 0,038816 | 0,21613  | n.s.    | uncharacterized protein LOC107349976 isoform X1                   |
| 1898  | AX-198038148 | Afix_02301  | NW_015441069 | 1282640 | T // G | 0,000333638 | 0,002886725 | outlier | 0,020664 | 0,88725  | n.s.    | neuronal acetylcholine receptor subunit alpha-10-like isoform X2  |
| 15050 | AX-197965373 | Apop_01842  | NW_015441449 | 210434  | T // G | 0,000111826 | 0,00123725  | outlier | 0,021087 | 0,75559  | n.s.    | lysyl oxidase homolog 4-like                                      |
| 1894  | AX-198060011 | Apop_00197  | NW_015441069 | 1273317 | A // G | 2,62E-05    | 0,000342842 | outlier | 0,024381 | 0,53157  | n.s.    | neuropeptide FF receptor 2-like                                   |
| 15616 | AX-212298598 | Apop_04398  | NW_015441494 | 114803  | T // C | 2,14E-08    | 5,99E-07    | outlier | 0,05681  | 0,10104  | n.s.    | trichohyalin-like isoform X3                                      |
| 15614 | AX-197965486 | Apop_01909  | NW_015441494 | 112470  | C // G | 2,48E-10    | 1,07E-08    | outlier | 0,070234 | 0,047632 | outlier | trichohyalin-like isoform X3                                      |
| 15790 | AX-212303788 | Apop_09558  | NW_015441499 | 83722   | A // T | 1,78E-13    | 1,42E-11    | outlier | 0,026932 | 0,39112  | n.s.    | pachytene checkpoint protein 2 homolog                            |
| 16048 | AX-197965567 | Apop_01959  | NW_015441517 | 262546  | A // T | 5,70E-05    | 0,00069312  | outlier | 0,022986 | 0,55768  | n.s.    | uncharacterized protein LOC107352106 isoform X2                   |
| 16072 | AX-212317125 | Apop_09607  | NW_015441518 | 282168  | A // G | 0,001262487 | 0,008755451 | outlier | 0,020955 | 0,88891  | n.s.    | inositol phosphorylceramide synthase catalytic subunit aur1-like  |
| 16304 | AX-197965606 | Apop_01986  | NW_015441538 | 193078  | T // C | 5,13E-09    | 1,56E-07    | outlier | 0,041276 | 0,20057  | n.s.    | adrenocorticotrophic hormone receptor-like                        |
| 16576 | AX-198062974 | Apop_02043  | NW_015441569 | 98253   | T // C | 3,21E-12    | 2,08E-10    | outlier | 0,062024 | 0,091423 | n.s.    | leucine-tRNA ligase, cytoplasmic-like isoform X3                  |
| 16680 | AX-212303983 | Apop_09753  | NW_015441583 | 65594   | C // G | 9,68E-07    | 1,78E-05    | outlier | 0,031018 | 0,31791  | n.s.    | E3 ubiquitin-protein ligase RNF213-like                           |

|       |              |             |              |                |             |             |         |          |            |         |                                                        |
|-------|--------------|-------------|--------------|----------------|-------------|-------------|---------|----------|------------|---------|--------------------------------------------------------|
| 2248  | AX-198060074 | Apop_00238  | NW_015441073 | 223836 T // C  | 9,30E-06    | 0,00013378  | outlier | 0,023622 | 0,54103    | n.s.    | melanocyte-stimulating hormone receptor-like           |
| 11228 | AX-197981850 | Apop_02813  | NW_015441279 | 33090 C // G   | 2,97E-13    | 2,28E-11    | outlier | 0,071786 | 0,029805   | outlier | uncharacterized protein LOC107344142                   |
| 16842 | AX-197965762 | Apop_02081  | NW_015441598 | 110091 A // G  | 1,54E-07    | 3,30E-06    | outlier | 0,049431 | 0,13732    | n.s.    | kelch-like protein diablo                              |
| 17072 | AX-212304089 | Apop_09859  | NW_015441628 | 116084 T // G  | 0,000143369 | 0,001528801 | outlier | 0,023463 | 0,53457    | n.s.    | disrupted in renal carcinoma protein 2-like isoform X1 |
| 17928 | AX-197966019 | Apop_02225  | NW_015441749 | 172505 A // G  | 0,000324855 | 0,002845761 | outlier | 0,02375  | 0,51291    | n.s.    | uncharacterized protein LOC107356543                   |
| 17932 | AX-198063268 | Apop_02233  | NW_015441751 | 53822 A // G   | 0,000112781 | 0,001244221 | outlier | 0,025944 | 0,45928    | n.s.    | mRNA-decapping enzyme 1B-like                          |
| 18012 | AX-198063284 | Apop_02243  | NW_015441774 | 165647 T // C  | 0,000410855 | 0,003479688 | outlier | 0,023066 | 0,55119    | n.s.    | multidrug and toxin extrusion protein 2-like           |
| 18134 | AX-198063309 | Apop_02259  | NW_015441802 | 154092 T // C  | 0,000160511 | 0,001633826 | outlier | 0,033831 | 0,28084    | n.s.    | hepatocyte nuclear factor 1-beta-A-like isoform X1     |
| 18210 | AX-197966110 | Apop_02275  | NW_015441816 | 34079 T // C   | 3,97E-07    | 7,96E-06    | outlier | 0,050377 | 0,14185    | n.s.    | protein FAM26E-like                                    |
| 18262 | AX-197966118 | Apop_02279  | NW_015441817 | 14551 C // G   | 0,0005333   | 0,004298023 | outlier | 0,022862 | 0,58646    | n.s.    | structural maintenance of chromosomes protein 1A-like  |
| 2538  | AX-198060095 | Apop_00252  | NW_015441076 | 1087807 A // G | 0,000160649 | 0,001633826 | outlier | 0,024824 | 0,50208    | n.s.    | uncharacterized protein PB18E9.04c-like                |
| 18440 | AX-197966148 | Apop_02295  | NW_015441856 | 88058 T // C   | 1,24E-09    | 4,34E-08    | outlier | 0,029266 | 0,33809    | n.s.    | exportin-T-like                                        |
| 18622 | AX-198063385 | Apop_02309  | NW_015441897 | 26703 T // G   | 4,42E-06    | 7,05E-05    | outlier | 0,024306 | 0,47828    | n.s.    | uncharacterized protein LOC107358496                   |
| 11283 | AX-197981829 | Apop_02800  | NW_015441279 | 270531 T // C  | 0,004213056 | 0,0221847   | n.s.    | 0,13831  | 0          | outlier | organic cation transporter protein-like                |
| 15615 | AX-197965487 | Apop_01910  | NW_015441494 | 113291 A // G  | 0,01144049  | 0,04674076  | n.s.    | 0,071129 | 0,049001   | outlier | trichohyalin-like isoform X3                           |
| 18700 | AX-212317705 | Apop_10188  | NW_015441914 | 91550 T // C   | 0,001466976 | 0,009699784 | outlier | 0,024547 | 0,49646    | n.s.    | protein FAM214A-like                                   |
| 8521  | AX-212316000 | Apop_08482  | NW_015441188 | 2721 A // G    | 0,002216824 | 0,0137098   | n.s.    | 0,094728 | 0,00030498 | outlier | #N/D                                                   |
| 14033 | AX-197982160 | Apop_02992  | NW_015441393 | 64062 T // C   | 0,0111096   | 0,04558348  | n.s.    | 0,10105  | 0,00021823 | outlier | #N/D                                                   |
| 15795 | AX-212303793 | Apop_09563  | NW_015441499 | 208905 A // T  | 0,002659663 | 0,01568818  | n.s.    | 0,088775 | 0,0017378  | outlier | #N/D                                                   |
| 5107  | AX-212292586 | AP_var_1236 | NW_015441114 | 259641 A // G  | 0,023705    | 0,07620884  | n.s.    | 0,085965 | 0,0045993  | outlier | #N/D                                                   |
| 7305  | AX-212302571 | Apop_08341  | NW_015441161 | 331568 T // C  | 0,01174906  | 0,04750375  | n.s.    | 0,11203  | 0,001106   | outlier | #N/D                                                   |
| 7143  | AX-198078703 | Apop_02655  | NW_015441157 | 457277 C // G  | 0,01410316  | 0,05403354  | n.s.    | 0,081147 | 0,0039646  | outlier | #N/D                                                   |
| 143   | AX-197981168 | Apop_02394  | NW_015441057 | 916328 C // G  | 0,008572371 | 0,03737637  | n.s.    | 0,093504 | 0,0007104  | outlier | #N/D                                                   |
| 1345  | AX-198059861 | Apop_00105  | NW_015441062 | 1032034 T // C | 0,006826498 | 0,03163797  | n.s.    | 0,082953 | 0,0097176  | outlier | #N/D                                                   |
| 12189 | AX-212312102 | Apop_04616  | NW_015441314 | 367510 A // T  | 0,05274298  | 0,1301839   | n.s.    | 0,073238 | 0,031933   | outlier | #N/D                                                   |
| 8055  | AX-212293377 | AP_var_2030 | NW_015441177 | 245662 T // C  | 0,01463635  | 0,05560501  | n.s.    | 0,087197 | 0,0067119  | outlier | #N/D                                                   |
| 9417  | AX-197964051 | Apop_01060  | NW_015441211 | 552329 A // G  | 0,006712988 | 0,03130137  | n.s.    | 0,096638 | 0,0024543  | outlier | #N/D                                                   |
| 9423  | AX-212300427 | Apop_06217  | NW_015441211 | 572850 C // G  | 0,006712988 | 0,03130137  | n.s.    | 0,096746 | 0,0026496  | outlier | #N/D                                                   |
| 961   | AX-212291473 | AP_var_0114 | NW_015441060 | 24336 A // T   | 0,006258319 | 0,029650841 | n.s.    | 0,087188 | 0,0056233  | outlier | #N/D                                                   |
| 12453 | AX-212316589 | Apop_09071  | NW_015441326 | 315279 A // G  | 0,01787701  | 0,06238484  | n.s.    | 0,066252 | 0,045453   | outlier | #N/D                                                   |
| 8595  | AX-197963894 | Apop_00971  | NW_015441190 | 288398 T // G  | 0,02513513  | 0,07945619  | n.s.    | 0,077896 | 0,019325   | outlier | #N/D                                                   |
| 18665 | AX-212317696 | Apop_10179  | NW_015441902 | 51385 A // T   | 0,001565966 | 0,01017789  | n.s.    | 0,085291 | 0,021103   | outlier | #N/D                                                   |
| 12181 | AX-212300211 | Apop_06001  | NW_015441314 | 362772 T // G  | 0,06692118  | 0,1522194   | n.s.    | 0,078628 | 0,027317   | outlier | #N/D                                                   |
| 19639 | AX-212298926 | Apop_04726  | NW_015442919 | 4784 A // G    | 0,06692118  | 0,1522194   | n.s.    | 0,075446 | 0,036273   | outlier | #N/D                                                   |

|       |              |             |              |         |        |             |             |         |          |            |         |      |
|-------|--------------|-------------|--------------|---------|--------|-------------|-------------|---------|----------|------------|---------|------|
| 12183 | AX-212310733 | Apop_03247  | NW_015441314 | 363274  | A // T | 0,06692118  | 0,1522194   | n.s.    | 0,075974 | 0,035532   | outlier | #N/D |
| 17163 | AX-212304101 | Apop_09871  | NW_015441636 | 89790   | T // C | 0,006908626 | 0,03182595  | n.s.    | 0,069786 | 0,034794   | outlier | #N/D |
| 5607  | AX-197981550 | Apop_02632  | NW_015441124 | 620028  | A // G | 0,02157988  | 0,07164903  | n.s.    | 0,07672  | 0,045027   | outlier | #N/D |
| 17729 | AX-212317514 | Apop_09996  | NW_015441710 | 65636   | A // G | 0,02211163  | 0,07309755  | n.s.    | 0,087238 | 0,014901   | outlier | #N/D |
| 5407  | AX-198060618 | Apop_00578  | NW_015441117 | 797988  | A // C | 0,009640662 | 0,04100672  | n.s.    | 0,069436 | 0,04088    | outlier | #N/D |
| 15833 | AX-198062802 | Apop_01933  | NW_015441503 | 187382  | T // C | 0,02667388  | 0,08210105  | n.s.    | 0,094629 | 0,025146   | outlier | #N/D |
| 1419  | AX-197981197 | Apop_02409  | NW_015441063 | 1017097 | A // T | 0,04373447  | 0,1164275   | n.s.    | 0,082934 | 0,012102   | outlier | #N/D |
| 5411  | AX-197963227 | Apop_00582  | NW_015441117 | 820279  | T // C | 0,02013686  | 0,067959    | n.s.    | 0,079545 | 0,011268   | outlier | #N/D |
| 10115 | AX-212302926 | Apop_08696  | NW_015441237 | 118552  | A // C | 0,02373179  | 0,07620884  | n.s.    | 0,088598 | 0,035901   | outlier | #N/D |
| 19465 | AX-212304605 | Apop_10375  | NW_015442377 | 32655   | T // C | 0,02884143  | 0,08686841  | n.s.    | 0,086033 | 0,0090504  | outlier | #N/D |
| 7273  | AX-198061002 | Apop_00811  | NW_015441160 | 290637  | T // C | 0,01552397  | 0,05755425  | n.s.    | 0,091727 | 0,0033828  | outlier | #N/D |
| 3381  | AX-197962893 | Apop_00381  | NW_015441089 | 534515  | T // C | 0,009832419 | 0,04163462  | n.s.    | 0,076533 | 0,049929   | outlier | #N/D |
| 2849  | AX-212305279 | AP_var_0634 | NW_015441079 | 467412  | A // G | 0,01411292  | 0,05403354  | n.s.    | 0,0818   | 0,032993   | outlier | #N/D |
| 5973  | AX-197963372 | Apop_00665  | NW_015441133 | 162420  | A // T | 0,03850881  | 0,1068266   | n.s.    | 0,0838   | 0,018      | outlier | #N/D |
| 7271  | AX-212315843 | Apop_08325  | NW_015441160 | 276828  | A // G | 0,05101932  | 0,1284937   | n.s.    | 0,074922 | 0,03892    | outlier | #N/D |
| 12495 | AX-212316604 | Apop_09086  | NW_015441330 | 248575  | T // G | 0,0172991   | 0,06127237  | n.s.    | 0,083048 | 0,016413   | outlier | #N/D |
| 17731 | AX-212317515 | Apop_09997  | NW_015441710 | 74573   | T // G | 0,2872043   | 0,3722931   | n.s.    | 0,11605  | 0,0082359  | outlier | #N/D |
| 12397 | AX-212294687 | AP_var_3340 | NW_015441323 | 266307  | T // C | 0,01086672  | 0,04487553  | n.s.    | 0,10156  | 0,0078465  | outlier | #N/D |
| 12399 | AX-212307975 | AP_var_3342 | NW_015441323 | 283170  | A // G | 0,01496758  | 0,05646003  | n.s.    | 0,10149  | 0,0094745  | outlier | #N/D |
| 2995  | AX-212292028 | AP_var_0670 | NW_015441081 | 821877  | T // C | 0,01318791  | 0,05151583  | n.s.    | 0,078672 | 0,034065   | outlier | #N/D |
| 145   | AX-198078300 | Apop_02396  | NW_015441057 | 952586  | A // G | 5,68E-06    | 8,66E-05    | outlier | 0,14224  | 0          | outlier | #N/D |
| 146   | AX-197981176 | Apop_02398  | NW_015441057 | 966667  | T // C | 3,73E-34    | 3,57E-31    | outlier | 0,15066  | 0          | outlier | #N/D |
| 148   | AX-198078307 | Apop_02400  | NW_015441057 | 976090  | T // G | 6,97E-30    | 3,34E-27    | outlier | 0,14143  | 0          | outlier | #N/D |
| 12902 | AX-212316660 | Apop_09142  | NW_015441353 | 352310  | C // G | 3,14E-53    | 1,20E-49    | outlier | 0,18121  | 0          | outlier | #N/D |
| 15788 | AX-212303787 | Apop_09557  | NW_015441499 | 78647   | A // G | 5,39E-37    | 6,88E-34    | outlier | 0,19671  | 0          | outlier | #N/D |
| 2832  | AX-197942719 | Afix_03180  | NW_015441079 | 220405  | C // G | 4,86E-06    | 7,57E-05    | outlier | 0,093406 | 0,017044   | outlier | #N/D |
| 2836  | AX-198039559 | Afix_03186  | NW_015441079 | 237170  | T // C | 1,83E-07    | 3,87E-06    | outlier | 0,10395  | 0,0044379  | outlier | #N/D |
| 12824 | AX-197954637 | Afix_10691  | NW_015441352 | 28578   | T // C | 4,21E-14    | 3,66E-12    | outlier | 0,095091 | 0,0015014  | outlier | #N/D |
| 2840  | AX-212291989 | AP_var_0630 | NW_015441079 | 316141  | C // G | 7,99E-09    | 2,32E-07    | outlier | 0,11313  | 0,00043244 | outlier | #N/D |
| 9405  | AX-212306351 | AP_var_1715 | NW_015441211 | 458272  | T // C | 0,000788137 | 0,005950925 | outlier | 0,11841  | 0,00030498 | outlier | #N/D |
| 12182 | AX-212306884 | AP_var_2251 | NW_015441314 | 363137  | A // C | 4,21E-07    | 8,35E-06    | outlier | 0,073421 | 0,025873   | outlier | #N/D |
| 15996 | AX-212309034 | AP_var_4404 | NW_015441515 | 165253  | A // T | 8,54E-05    | 0,000981268 | outlier | 0,094818 | 0,035164   | outlier | #N/D |
| 17999 | AX-212296530 | AP_var_5186 | NW_015441773 | 54242   | T // C | 0,000260517 | 0,002385888 | outlier | 0,098752 | 0,00033975 | outlier | #N/D |
| 18666 | AX-212296772 | AP_var_5428 | NW_015441902 | 53282   | T // C | 2,52E-15    | 2,68E-13    | outlier | 0,082244 | 0,030163   | outlier | #N/D |
| 1488  | AX-198059946 | Apop_00156  | NW_015441064 | 884998  | A // G | 2,26E-21    | 5,76E-19    | outlier | 0,12151  | 3,16E-05   | outlier | #N/D |
| 2586  | AX-198060132 | Apop_00273  | NW_015441077 | 28479   | T // C | 1,32E-25    | 4,59E-23    | outlier | 0,10107  | 0,00025867 | outlier | #N/D |

|       |              |            |              |               |             |                     |          |                    |      |
|-------|--------------|------------|--------------|---------------|-------------|---------------------|----------|--------------------|------|
| 2848  | AX-198060200 | Apop_00310 | NW_015441079 | 449882 A // C | 8,40E-12    | 5,02E-10 outlier    | 0,14373  | 0,00021823 outlier | #N/D |
| 4110  | AX-198060444 | Apop_00467 | NW_015441098 | 781826 T // C | 4,73E-08    | 1,20E-06 outlier    | 0,090692 | 0,0072874 outlier  | #N/D |
| 5406  | AX-197963218 | Apop_00577 | NW_015441117 | 787901 T // C | 4,11E-11    | 2,01E-09 outlier    | 0,071781 | 0,030877 outlier   | #N/D |
| 12003 | AX-198061965 | Apop_01410 | NW_015441306 | 382444 T // G | 3,04E-06    | 4,90E-05 outlier    | 0,10966  | 0 outlier          | #N/D |
| 12138 | AX-197964695 | Apop_01431 | NW_015441313 | 383905 T // C | 1,01E-06    | 1,83E-05 outlier    | 0,080643 | 0,01966 outlier    | #N/D |
| 14009 | AX-197965164 | Apop_01713 | NW_015441388 | 288402 A // C | 0,000583909 | 0,004599386 outlier | 0,11378  | 0 outlier          | #N/D |
| 14346 | AX-197965244 | Apop_01763 | NW_015441413 | 260185 T // C | 2,01E-22    | 5,93E-20 outlier    | 0,10396  | 0,00033975 outlier | #N/D |
| 17998 | AX-197966049 | Apop_02242 | NW_015441773 | 48608 C // G  | 2,24E-16    | 2,95E-14 outlier    | 0,097353 | 0,00086359 outlier | #N/D |
| 19109 | AX-197966253 | Apop_02351 | NW_015442074 | 58087 C // G  | 5,92E-05    | 0,000714458 outlier | 0,11256  | 6,67E-05 outlier   | #N/D |
| 8899  | AX-198078822 | Apop_02733 | NW_015441196 | 557406 A // C | 0,001475024 | 0,009718819 outlier | 0,10871  | 0,00021823 outlier | #N/D |
| 8900  | AX-197981720 | Apop_02735 | NW_015441196 | 560200 T // G | 1,77E-15    | 2,00E-13 outlier    | 0,10849  | 0,00047438 outlier | #N/D |
| 8901  | AX-197981722 | Apop_02736 | NW_015441196 | 560352 A // G | 0,001475024 | 0,009718819 outlier | 0,10736  | 0,00043244 outlier | #N/D |
| 8904  | AX-198078835 | Apop_02742 | NW_015441196 | 576004 A // C | 8,71E-07    | 1,63E-05 outlier    | 0,079479 | 0,038541 outlier   | #N/D |
| 11206 | AX-198078879 | Apop_02774 | NW_015441279 | 10893 A // T  | 2,01E-14    | 1,83E-12 outlier    | 0,075604 | 0,015804 outlier   | #N/D |
| 11288 | AX-198078919 | Apop_02801 | NW_015441279 | 279230 A // T | 2,66E-12    | 1,76E-10 outlier    | 0,13392  | 3,16E-05 outlier   | #N/D |
| 11220 | AX-197981831 | Apop_02802 | NW_015441279 | 29438 A // G  | 7,12E-16    | 8,52E-14 outlier    | 0,081089 | 0,0076614 outlier  | #N/D |
| 11221 | AX-198078923 | Apop_02803 | NW_015441279 | 29562 T // C  | 0,000917557 | 0,006729044 outlier | 0,081463 | 0,0052704 outlier  | #N/D |
| 11222 | AX-197981837 | Apop_02805 | NW_015441279 | 30188 T // C  | 1,09E-16    | 1,61E-14 outlier    | 0,080788 | 0,0065265 outlier  | #N/D |
| 11223 | AX-198078929 | Apop_02807 | NW_015441279 | 31332 C // G  | 0,000917557 | 0,006729044 outlier | 0,080297 | 0,008039 outlier   | #N/D |
| 11224 | AX-198078931 | Apop_02808 | NW_015441279 | 32028 T // C  | 1,09E-16    | 1,61E-14 outlier    | 0,07948  | 0,007475 outlier   | #N/D |
| 11205 | AX-198078988 | Apop_02840 | NW_015441279 | 9180 A // G   | 0,00066622  | 0,00511737 outlier  | 0,081698 | 0,0049239 outlier  | #N/D |
| 11214 | AX-212316417 | Apop_08899 | NW_015441279 | 19882 T // C  | 2,70E-10    | 1,13E-08 outlier    | 0,061592 | 0,061783 n.s.      | #N/D |
| 13738 | AX-197982124 | Apop_02972 | NW_015441377 | 145701 A // G | 2,45E-13    | 1,91E-11 outlier    | 0,10292  | 0,0023578 outlier  | #N/D |
| 16838 | AX-212304012 | Apop_09782 | NW_015441598 | 85215 A // G  | 2,39E-08    | 6,59E-07 outlier    | 0,065182 | 0,054834 n.s.      | #N/D |
| 13740 | AX-198079232 | Apop_02973 | NW_015441377 | 157621 A // T | 1,30E-10    | 5,78E-09 outlier    | 0,095425 | 0,010213 outlier   | #N/D |
| 7142  | AX-212310996 | Apop_03510 | NW_015441157 | 447358 T // C | 4,28E-19    | 8,63E-17 outlier    | 0,12196  | 3,16E-05 outlier   | #N/D |
| 17377 | AX-212311312 | Apop_03826 | NW_015441656 | 20136 A // G  | 7,85E-05    | 0,000910862 outlier | 0,11249  | 0,00013336 outlier | #N/D |
| 9422  | AX-212311489 | Apop_04003 | NW_015441211 | 572305 A // G | 1,18E-11    | 6,72E-10 outlier    | 0,096677 | 0,0027538 outlier  | #N/D |
| 11232 | AX-198078970 | Apop_02830 | NW_015441279 | 57607 T // C  | 7,65E-13    | 5,74E-11 outlier    | 0,058747 | 0,082239 n.s.      | #N/D |
| 14106 | AX-198062463 | Apop_01727 | NW_015441399 | 61217 A // G  | 1,37E-08    | 3,94E-07 outlier    | 0,058365 | 0,089703 n.s.      | #N/D |
| 9416  | AX-212298444 | Apop_04244 | NW_015441211 | 551925 T // C | 6,77E-12    | 4,11E-10 outlier    | 0,10114  | 0,0014329 outlier  | #N/D |
| 9410  | AX-212311961 | Apop_04475 | NW_015441211 | 547031 T // C | 7,85E-08    | 1,83E-06 outlier    | 0,08473  | 0,012657 outlier   | #N/D |
| 12180 | AX-212312181 | Apop_04695 | NW_015441314 | 362263 A // G | 4,54E-06    | 7,16E-05 outlier    | 0,076169 | 0,032641 outlier   | #N/D |
| 15328 | AX-212313261 | Apop_05764 | NW_015441470 | 204386 T // C | 4,90E-16    | 6,25E-14 outlier    | 0,11582  | 0 outlier          | #N/D |
| 11204 | AX-197981891 | Apop_02838 | NW_015441279 | 8502 C // G   | 2,05E-09    | 6,81E-08 outlier    | 0,05202  | 0,10858 n.s.       | #N/D |
| 9306  | AX-212313323 | Apop_05826 | NW_015441208 | 498891 T // C | 2,77E-09    | 9,06E-08 outlier    | 0,10642  | 0,010463 outlier   | #N/D |

|       |              |             |              |                |             |                     |          |                    |      |
|-------|--------------|-------------|--------------|----------------|-------------|---------------------|----------|--------------------|------|
| 12184 | AX-212300119 | Apop_05909  | NW_015441314 | 363922 T // C  | 4,54E-06    | 7,16E-05 outlier    | 0,07721  | 0,027673 outlier   | #N/D |
| 19640 | AX-212313665 | Apop_06168  | NW_015442919 | 5280 A // G    | 2,01E-06    | 3,35E-05 outlier    | 0,076258 | 0,020733 outlier   | #N/D |
| 19638 | AX-212314176 | Apop_06692  | NW_015442919 | 2496 A // T    | 2,99E-05    | 0,000384714 outlier | 0,071851 | 0,049001 outlier   | #N/D |
| 144   | AX-212301499 | Apop_07311  | NW_015441057 | 950956 T // C  | 8,46E-14    | 7,20E-12 outlier    | 0,09329  | 0,00078516 outlier | #N/D |
| 151   | AX-212314790 | Apop_07314  | NW_015441057 | 991822 A // C  | 0,000227945 | 0,002133526 outlier | 0,12201  | 0 outlier          | #N/D |
| 1338  | AX-212314918 | Apop_07417  | NW_015441062 | 1006701 A // C | 1,58E-09    | 5,45E-08 outlier    | 0,07917  | 0,02 outlier       | #N/D |
| 16492 | AX-197965669 | Apop_02025  | NW_015441556 | 160798 C // G  | 1,10E-07    | 2,49E-06 outlier    | 0,058403 | 0,083398 n.s.      | #N/D |
| 3583  | AX-212315230 | Apop_07729  | NW_015441091 | 524487 A // G  | 0,001409459 | 0,009449458 outlier | 0,084971 | 0,0058012 outlier  | #N/D |
| 6758  | AX-212302430 | Apop_08200  | NW_015441148 | 828299 T // C  | 4,11E-11    | 2,01E-09 outlier    | 0,070928 | 0,031581 outlier   | #N/D |
| 7268  | AX-212302551 | Apop_08321  | NW_015441160 | 188497 A // C  | 1,79E-16    | 2,47E-14 outlier    | 0,10812  | 0,00025867 outlier | #N/D |
| 10892 | AX-212316332 | Apop_08814  | NW_015441267 | 447652 T // C  | 3,41E-10    | 1,39E-08 outlier    | 0,047725 | 0,14566 n.s.       | #N/D |
| 10886 | AX-212303042 | Apop_08812  | NW_015441267 | 423649 A // G  | 3,41E-10    | 1,39E-08 outlier    | 0,048024 | 0,14642 n.s.       | #N/D |
| 9406  | AX-212316104 | Apop_08586  | NW_015441211 | 459855 A // G  | 1,27E-13    | 1,04E-11 outlier    | 0,11353  | 0,0013651 outlier  | #N/D |
| 11074 | AX-212303091 | Apop_08861  | NW_015441273 | 189154 T // C  | 2,24E-11    | 1,19E-09 outlier    | 0,075178 | 0,028027 outlier   | #N/D |
| 18730 | AX-212304431 | Apop_10201  | NW_015441931 | 138560 T // G  | 0,00012365  | 0,001344751 outlier | 0,059206 | 0,14489 n.s.       | #N/D |
| 4396  | AX-212302080 | Apop_07867  | NW_015441104 | 895958 A // C  | 7,15E-08    | 1,71E-06 outlier    | 0,058057 | 0,1093 n.s.        | #N/D |
| 9772  | AX-212302873 | Apop_08643  | NW_015441224 | 50693 C // G   | 5,16E-07    | 9,93E-06 outlier    | 0,036352 | 0,23515 n.s.       | #N/D |
| 15852 | AX-212300790 | Apop_06593  | NW_015441504 | 198362 A // T  | 1,92E-09    | 6,45E-08 outlier    | 0,063069 | 0,079359 n.s.      | #N/D |
| 11180 | AX-212303120 | Apop_08890  | NW_015441278 | 220143 A // G  | 5,44E-10    | 2,07E-08 outlier    | 0,078991 | 0,038159 outlier   | #N/D |
| 17448 | AX-212296347 | AP_var_5003 | NW_015441663 | 107893 A // C  | 2,07E-07    | 4,26E-06 outlier    | 0,051254 | 0,1426 n.s.        | #N/D |
| 14341 | AX-212303631 | Apop_09401  | NW_015441413 | 210201 T // C  | 9,91E-05    | 0,001122258 outlier | 0,10324  | 0,00021823 outlier | #N/D |
| 4268  | AX-212315351 | Apop_07850  | NW_015441104 | 31836 T // G   | 1,34E-07    | 2,95E-06 outlier    | 0,033512 | 0,26738 n.s.       | #N/D |
| 8266  | AX-212315978 | Apop_08460  | NW_015441181 | 462154 A // G  | 0,000257646 | 0,002370942 outlier | 0,063129 | 0,097957 n.s.      | #N/D |
| 15454 | AX-212317044 | Apop_09526  | NW_015441479 | 56144 T // C   | 5,65E-11    | 2,67E-09 outlier    | 0,080962 | 0,0072874 outlier  | #N/D |
| 5620  | AX-212302244 | Apop_08031  | NW_015441125 | 25339 T // C   | 5,98E-05    | 0,000719735 outlier | 0,056718 | 0,10433 n.s.       | #N/D |
| 18984 | AX-212317774 | Apop_10257  | NW_015442016 | 76448 A // G   | 6,23E-09    | 1,86E-07 outlier    | 0,038308 | 0,22095 n.s.       | #N/D |
| 15786 | AX-212317073 | Apop_09555  | NW_015441499 | 63304 C // G   | 7,30E-11    | 3,33E-09 outlier    | 0,072686 | 0,024782 outlier   | #N/D |
| 9536  | AX-212316116 | Apop_08598  | NW_015441215 | 283074 A // G  | 2,34E-05    | 0,000315341 outlier | 0,032646 | 0,30574 n.s.       | #N/D |
| 16972 | AX-212304063 | Apop_09833  | NW_015441618 | 226165 A // G  | 1,02E-07    | 2,36E-06 outlier    | 0,076661 | 0,044605 outlier   | #N/D |
| 10214 | AX-212316232 | Apop_08714  | NW_015441240 | 192312 A // G  | 0,000122914 | 0,001344385 outlier | 0,06149  | 0,10168 n.s.       | #N/D |
| 2406  | AX-198060081 | Apop_00242  | NW_015441074 | 1194496 A // C | 1,44E-06    | 2,54E-05 outlier    | 0,038057 | 0,23671 n.s.       | #N/D |
| 16992 | AX-212317356 | Apop_09838  | NW_015441623 | 21001 T // G   | 1,92E-14    | 1,79E-12 outlier    | 0,093288 | 0,00052511 outlier | #N/D |
| 5526  | AX-212315511 | Apop_08010  | NW_015441122 | 642177 A // G  | 2,09E-10    | 9,10E-09 outlier    | 0,038488 | 0,24366 n.s.       | #N/D |
| 14982 | AX-212317000 | Apop_09482  | NW_015441448 | 269046 A // G  | 1,65E-05    | 0,000227657 outlier | 0,058624 | 0,094366 n.s.      | #N/D |
| 12968 | AX-212303404 | Apop_09174  | NW_015441356 | 399749 A // G  | 9,27E-07    | 1,72E-05 outlier    | 0,030304 | 0,31991 n.s.       | #N/D |
| 13832 | AX-212303518 | Apop_09288  | NW_015441378 | 344168 A // C  | 2,18E-07    | 4,46E-06 outlier    | 0,033092 | 0,30438 n.s.       | #N/D |

|       |              |             |              |         |        |             |             |         |          |            |         |      |
|-------|--------------|-------------|--------------|---------|--------|-------------|-------------|---------|----------|------------|---------|------|
| 4372  | AX-212315365 | Apop_07864  | NW_015441104 | 836572  | T // G | 6,28E-06    | 9,35E-05    | outlier | 0,039877 | 0,21371    | n.s.    | #N/D |
| 17048 | AX-197965829 | Apop_02116  | NW_015441625 | 156366  | T // G | 2,58E-05    | 0,000341459 | outlier | 0,040392 | 0,18645    | n.s.    | #N/D |
| 11262 | AX-212294353 | AP_var_3006 | NW_015441279 | 227329  | T // C | 1,61E-12    | 1,10E-10    | outlier | 0,029451 | 0,32782    | n.s.    | #N/D |
| 1418  | AX-212314942 | Apop_07441  | NW_015441063 | 1016603 | A // T | 2,71E-05    | 0,000353521 | outlier | 0,039295 | 0,21044    | n.s.    | #N/D |
| 3768  | AX-198060374 | Apop_00421  | NW_015441093 | 860033  | A // G | 4,13E-05    | 0,000518631 | outlier | 0,027652 | 0,36627    | n.s.    | #N/D |
| 19076 | AX-212317797 | Apop_10280  | NW_015442053 | 82417   | A // G | 6,67E-11    | 3,07E-09    | outlier | 0,095466 | 0,00090862 | outlier | #N/D |
| 7754  | AX-212315924 | Apop_08406  | NW_015441169 | 449894  | T // C | 1,50E-07    | 3,25E-06    | outlier | 0,032639 | 0,28154    | n.s.    | #N/D |
| 1446  | AX-212314342 | Apop_06858  | NW_015441063 | 1262159 | T // C | 0,000203379 | 0,00194642  | outlier | 0,073935 | 0,084554   | n.s.    | #N/D |
| 1444  | AX-198059932 | Apop_00148  | NW_015441063 | 1260313 | A // G | 0,000203379 | 0,00194642  | outlier | 0,078042 | 0,066411   | n.s.    | #N/D |
| 1442  | AX-197962499 | Apop_00147  | NW_015441063 | 1259966 | A // G | 0,000203379 | 0,00194642  | outlier | 0,076843 | 0,075865   | n.s.    | #N/D |
| 1438  | AX-212299176 | Apop_04977  | NW_015441063 | 1257490 | T // G | 0,000203379 | 0,00194642  | outlier | 0,076058 | 0,072321   | n.s.    | #N/D |
| 10212 | AX-212302943 | Apop_08713  | NW_015441240 | 162498  | T // C | 3,27E-05    | 0,000417017 | outlier | 0,037796 | 0,24519    | n.s.    | #N/D |
| 4262  | AX-212292433 | AP_var_1083 | NW_015441103 | 1090334 | A // G | 2,72E-05    | 0,000353521 | outlier | 0,029833 | 0,34441    | n.s.    | #N/D |
| 7728  | AX-212314770 | Apop_07290  | NW_015441169 | 148784  | T // C | 0,001010342 | 0,007242988 | outlier | 0,030481 | 0,35001    | n.s.    | #N/D |
| 14366 | AX-212303635 | Apop_09405  | NW_015441415 | 87222   | A // C | 0,000248393 | 0,002291299 | outlier | 0,031336 | 0,29618    | n.s.    | #N/D |
| 7292  | AX-198045027 | Afix_06620  | NW_015441161 | 210899  | T // C | 1,95E-06    | 3,27E-05    | outlier | 0,060025 | 0,10233    | n.s.    | #N/D |
| 13062 | AX-212308225 | AP_var_3592 | NW_015441362 | 121531  | T // C | 1,35E-05    | 0,000190733 | outlier | 0,036789 | 0,24135    | n.s.    | #N/D |
| 12960 | AX-197964977 | Apop_01598  | NW_015441355 | 408277  | A // G | 0,000323199 | 0,00283775  | outlier | 0,026297 | 0,44717    | n.s.    | #N/D |
| 3988  | AX-212301998 | Apop_07785  | NW_015441096 | 708887  | T // C | 0,001131744 | 0,007993548 | outlier | 0,03745  | 0,255      | n.s.    | #N/D |
| 3396  | AX-198060324 | Apop_00388  | NW_015441090 | 187231  | A // G | 1,29E-05    | 0,000183924 | outlier | 0,025064 | 0,46138    | n.s.    | #N/D |
| 10038 | AX-212299473 | Apop_05274  | NW_015441230 | 517848  | T // C | 2,60E-05    | 0,000341459 | outlier | 0,029722 | 0,32322    | n.s.    | #N/D |
| 6736  | AX-212315714 | Apop_08196  | NW_015441148 | 741367  | T // C | 0,000263153 | 0,002404283 | outlier | 0,036839 | 0,25574    | n.s.    | #N/D |
| 6744  | AX-212315715 | Apop_08197  | NW_015441148 | 765282  | A // G | 0,000508755 | 0,004135029 | outlier | 0,036219 | 0,26951    | n.s.    | #N/D |
| 17926 | AX-197966016 | Apop_02223  | NW_015441749 | 142594  | A // G | 6,87E-07    | 1,30E-05    | outlier | 0,037312 | 0,22811    | n.s.    | #N/D |
| 7730  | AX-212299406 | Apop_05207  | NW_015441169 | 149794  | T // C | 0,000542318 | 0,004333176 | outlier | 0,029551 | 0,3543     | n.s.    | #N/D |
| 15880 | AX-212295703 | AP_var_4359 | NW_015441505 | 296489  | A // G | 1,19E-06    | 2,12E-05    | outlier | 0,027243 | 0,38119    | n.s.    | #N/D |
| 7738  | AX-197963719 | Apop_00869  | NW_015441169 | 217565  | T // C | 0,000438091 | 0,003664655 | outlier | 0,028597 | 0,3692     | n.s.    | #N/D |
| 12502 | AX-197964841 | Apop_01509  | NW_015441330 | 442437  | C // G | 0,000208658 | 0,001982081 | outlier | 0,046371 | 0,15753    | n.s.    | #N/D |
| 8082  | AX-212293400 | AP_var_2053 | NW_015441178 | 611595  | T // C | 5,54E-05    | 0,000680156 | outlier | 0,031653 | 0,30302    | n.s.    | #N/D |
| 7660  | AX-212297844 | Apop_03644  | NW_015441168 | 331735  | A // G | 3,05E-06    | 4,90E-05    | outlier | 0,028503 | 0,36803    | n.s.    | #N/D |
| 7358  | AX-198061022 | Apop_00825  | NW_015441162 | 50958   | A // T | 2,83E-05    | 0,000367005 | outlier | 0,024413 | 0,48021    | n.s.    | #N/D |
| 1480  | AX-212311697 | Apop_04211  | NW_015441063 | 1613083 | C // G | 2,48E-05    | 0,00032916  | outlier | 0,02749  | 0,40336    | n.s.    | #N/D |
| 15362 | AX-212303751 | Apop_09521  | NW_015441475 | 55725   | A // C | 1,45E-06    | 2,54E-05    | outlier | 0,028569 | 0,38785    | n.s.    | #N/D |
| 9092  | AX-212316057 | Apop_08539  | NW_015441202 | 148993  | A // G | 0,000634725 | 0,004918688 | outlier | 0,032029 | 0,32388    | n.s.    | #N/D |
| 5530  | AX-212315514 | Apop_08013  | NW_015441122 | 686677  | T // G | 1,87E-06    | 3,14E-05    | outlier | 0,025311 | 0,49503    | n.s.    | #N/D |
| 14620 | AX-198060083 | Apop_00244  | NW_015441435 | 126746  | A // G | 1,81E-07    | 3,86E-06    | outlier | 0,02843  | 0,39167    | n.s.    | #N/D |

|       |              |             |              |                |             |             |         |          |         |      |      |
|-------|--------------|-------------|--------------|----------------|-------------|-------------|---------|----------|---------|------|------|
| 10112 | AX-197964249 | Apop_01178  | NW_015441236 | 465439 A // T  | 1,44E-05    | 0,000201626 | outlier | 0,024814 | 0,45417 | n.s. | #N/D |
| 4252  | AX-198060485 | Apop_00495  | NW_015441103 | 773056 T // C  | 1,30E-05    | 0,0001846   | outlier | 0,025459 | 0,43538 | n.s. | #N/D |
| 16664 | AX-212312301 | Apop_04816  | NW_015441579 | 128737 A // G  | 3,55E-08    | 9,31E-07    | outlier | 0,030827 | 0,31184 | n.s. | #N/D |
| 10192 | AX-212316225 | Apop_08707  | NW_015441238 | 364639 C // G  | 1,92E-05    | 0,000261104 | outlier | 0,04282  | 0,17974 | n.s. | #N/D |
| 19222 | AX-212317834 | Apop_10317  | NW_015442137 | 33781 A // G   | 0,001325851 | 0,00908587  | outlier | 0,023987 | 0,5226  | n.s. | #N/D |
| 5528  | AX-212315513 | Apop_08012  | NW_015441122 | 662686 A // G  | 8,84E-08    | 2,05E-06    | outlier | 0,026916 | 0,44043 | n.s. | #N/D |
| 15248 | AX-212308781 | AP_var_4148 | NW_015441464 | 248273 A // C  | 0,00096148  | 0,006957855 | outlier | 0,024493 | 0,48402 | n.s. | #N/D |
| 10646 | AX-212316308 | Apop_08790  | NW_015441259 | 507375 T // C  | 4,68E-05    | 0,000583173 | outlier | 0,024273 | 0,50518 | n.s. | #N/D |
| 17684 | AX-212317511 | Apop_09993  | NW_015441708 | 64616 T // G   | 0,000543322 | 0,004333176 | outlier | 0,025632 | 0,44717 | n.s. | #N/D |
| 10316 | AX-198061651 | Apop_01213  | NW_015441248 | 350972 A // G  | 8,81E-05    | 0,00100939  | outlier | 0,061398 | 0,11002 | n.s. | #N/D |
| 7542  | AX-212302596 | Apop_08366  | NW_015441164 | 644970 T // C  | 0,000502738 | 0,004094814 | outlier | 0,023185 | 0,55953 | n.s. | #N/D |
| 13300 | AX-212316742 | Apop_09224  | NW_015441365 | 409321 T // C  | 0,00011897  | 0,001308729 | outlier | 0,025451 | 0,46918 | n.s. | #N/D |
| 5604  | AX-212302240 | Apop_08027  | NW_015441124 | 615895 T // C  | 0,00117863  | 0,008278884 | outlier | 0,024339 | 0,52038 | n.s. | #N/D |
| 15354 | AX-197965442 | Apop_01882  | NW_015441472 | 357634 A // G  | 0,000619895 | 0,004833118 | outlier | 0,023909 | 0,52386 | n.s. | #N/D |
| 11790 | AX-198079021 | Apop_02858  | NW_015441302 | 475986 T // C  | 0,000226216 | 0,002129799 | outlier | 0,024049 | 0,51025 | n.s. | #N/D |
| 9446  | AX-212316112 | Apop_08594  | NW_015441213 | 100901 A // T  | 7,16E-05    | 0,000843682 | outlier | 0,023676 | 0,54419 | n.s. | #N/D |
| 11800 | AX-197940163 | Afix_01585  | NW_015441302 | 496006 T // C  | 6,86E-05    | 0,000815414 | outlier | 0,022839 | 0,56421 | n.s. | #N/D |
| 11080 | AX-212303094 | Apop_08864  | NW_015441273 | 223964 A // G  | 0,000159014 | 0,001633826 | outlier | 0,023762 | 0,52418 | n.s. | #N/D |
| 11076 | AX-212303092 | Apop_08862  | NW_015441273 | 207535 T // G  | 0,000159014 | 0,001633826 | outlier | 0,023567 | 0,52667 | n.s. | #N/D |
| 16094 | AX-212317131 | Apop_09613  | NW_015441521 | 35706 A // G   | 0,00057909  | 0,004570833 | outlier | 0,023237 | 0,55768 | n.s. | #N/D |
| 6142  | AX-212306153 | AP_var_1517 | NW_015441137 | 90831 T // C   | 0,000329548 | 0,002880282 | outlier | 0,023072 | 0,555   | n.s. | #N/D |
| 2850  | AX-198060202 | Apop_00311  | NW_015441079 | 481914 T // C  | 0,00063683  | 0,004921305 | outlier | 0,023303 | 0,55581 | n.s. | #N/D |
| 700   | AX-212301520 | Apop_07332  | NW_015441058 | 672420 A // G  | 0,000233247 | 0,002177826 | outlier | 0,022423 | 0,6243  | n.s. | #N/D |
| 6754  | AX-212315716 | Apop_08198  | NW_015441148 | 812475 A // G  | 0,000348538 | 0,003005096 | outlier | 0,024686 | 0,49753 | n.s. | #N/D |
| 7546  | AX-212315885 | Apop_08367  | NW_015441164 | 650081 A // G  | 0,001404266 | 0,009449458 | outlier | 0,023759 | 0,52386 | n.s. | #N/D |
| 9110  | AX-197963957 | Apop_01009  | NW_015441202 | 566188 T // C  | 0,000667047 | 0,00511737  | outlier | 0,021503 | 0,78575 | n.s. | #N/D |
| 16096 | AX-198062852 | Apop_01963  | NW_015441521 | 136440 A // G  | 0,00022647  | 0,002129799 | outlier | 0,023663 | 0,51192 | n.s. | #N/D |
| 19518 | AX-212297266 | AP_var_5922 | NW_015442468 | 20698 C // G   | 0,000388184 | 0,00330965  | outlier | 0,044351 | 0,18896 | n.s. | #N/D |
| 12454 | AX-198062096 | Apop_01488  | NW_015441326 | 316088 A // G  | 2,36E-05    | 0,000315341 | outlier | 0,049779 | 0,15753 | n.s. | #N/D |
| 12460 | AX-198062104 | Apop_01493  | NW_015441326 | 349283 A // G  | 2,36E-05    | 0,000315341 | outlier | 0,046563 | 0,17394 | n.s. | #N/D |
| 12462 | AX-197964817 | Apop_01495  | NW_015441326 | 351471 C // G  | 2,36E-05    | 0,000315341 | outlier | 0,049469 | 0,15834 | n.s. | #N/D |
| 15998 | AX-212295749 | AP_var_4405 | NW_015441515 | 188931 C // G  | 6,03E-05    | 0,000723159 | outlier | 0,02228  | 0,58759 | n.s. | #N/D |
| 19384 | AX-198063480 | Apop_02370  | NW_015442268 | 48376 T // G   | 0,00136777  | 0,009300265 | outlier | 0,023363 | 0,57664 | n.s. | #N/D |
| 16152 | AX-212303854 | Apop_09624  | NW_015441525 | 140659 A // T  | 7,20E-08    | 1,71E-06    | outlier | 0,028521 | 0,35733 | n.s. | #N/D |
| 11466 | AX-212294403 | AP_var_3056 | NW_015441287 | 205248 A // C  | 0,000541084 | 0,004333176 | outlier | 0,021866 | 0,68367 | n.s. | #N/D |
| 1252  | AX-198059842 | Apop_00095  | NW_015441061 | 1817312 A // G | 0,000189122 | 0,001865957 | outlier | 0,022056 | 0,67702 | n.s. | #N/D |

|       |              |             |              |        |        |             |             |         |          |         |      |      |
|-------|--------------|-------------|--------------|--------|--------|-------------|-------------|---------|----------|---------|------|------|
| 16832 | AX-212298251 | Apop_04051  | NW_015441597 | 30195  | C // G | 0,001481002 | 0,009741446 | outlier | 0,02186  | 0,67434 | n.s. | #N/D |
| 12340 | AX-212316568 | Apop_09050  | NW_015441321 | 53046  | T // C | 0,00114049  | 0,008040489 | outlier | 0,02149  | 0,79054 | n.s. | #N/D |
| 18602 | AX-212297773 | Apop_03573  | NW_015441889 | 117399 | T // G | 0,000767266 | 0,005816276 | outlier | 0,022008 | 0,62768 | n.s. | #N/D |
| 11788 | AX-198079016 | Apop_02855  | NW_015441302 | 474908 | A // C | 0,000763022 | 0,005807108 | outlier | 0,021639 | 0,71163 | n.s. | #N/D |
| 2084  | AX-197962635 | Apop_00224  | NW_015441071 | 592942 | T // C | 0,000332636 | 0,002886725 | outlier | 0,022172 | 0,60859 | n.s. | #N/D |
| 12456 | AX-212307998 | AP_var_3365 | NW_015441326 | 341028 | A // C | 6,42E-05    | 0,000765099 | outlier | 0,04448  | 0,19063 | n.s. | #N/D |
| 14338 | AX-212314659 | Apop_07176  | NW_015441413 | 174173 | T // C | 0,000124673 | 0,001352037 | outlier | 0,042801 | 0,21694 | n.s. | #N/D |
| 18452 | AX-212296707 | AP_var_5363 | NW_015441858 | 147527 | T // C | 0,00091168  | 0,006725486 | outlier | 0,021448 | 0,79423 | n.s. | #N/D |
| 17282 | AX-198063127 | Apop_02142  | NW_015441651 | 170377 | T // C | 0,000161066 | 0,001633826 | outlier | 0,021815 | 0,64237 | n.s. | #N/D |
| 9420  | AX-197964055 | Apop_01062  | NW_015441211 | 559456 | A // G | 0,000100684 | 0,001136973 | outlier | 0,021577 | 0,62029 | n.s. | #N/D |
| 9444  | AX-212316111 | Apop_08593  | NW_015441213 | 64504  | C // G | 0,001515909 | 0,009936899 | outlier | 0,021777 | 0,64094 | n.s. | #N/D |
| 3734  | AX-212315242 | Apop_07741  | NW_015441093 | 272876 | T // C | 0,000354717 | 0,003051497 | outlier | 0,022199 | 0,65591 | n.s. | #N/D |
| 19080 | AX-197966248 | Apop_02348  | NW_015442057 | 53484  | A // G | 9,28E-05    | 0,001057408 | outlier | 0,021952 | 0,60859 | n.s. | #N/D |
| 16510 | AX-198062950 | Apop_02028  | NW_015441561 | 197364 | A // G | 0,000101143 | 0,0011388   | outlier | 0,021743 | 0,74183 | n.s. | #N/D |
| 5654  | AX-198060699 | Apop_00624  | NW_015441126 | 497261 | A // G | 6,26E-06    | 9,35E-05    | outlier | 0,021393 | 0,76534 | n.s. | #N/D |
| 6122  | AX-212315626 | Apop_08108  | NW_015441136 | 786540 | A // G | 0,000877216 | 0,00652393  | outlier | 0,021573 | 0,66461 | n.s. | #N/D |
| 17522 | AX-212313826 | Apop_06329  | NW_015441682 | 172380 | A // C | 0,000468047 | 0,003844984 | outlier | 0,021315 | 0,8628  | n.s. | #N/D |
| 10034 | AX-212311850 | Apop_04364  | NW_015441230 | 182207 | C // G | 0,000468047 | 0,003844984 | outlier | 0,021524 | 0,838   | n.s. | #N/D |
| 7304  | AX-197948098 | Afix_06635  | NW_015441161 | 330405 | C // G | 0,000420928 | 0,003541499 | outlier | 0,021935 | 0,66957 | n.s. | #N/D |
| 1544  | AX-212304921 | AP_var_0276 | NW_015441065 | 818376 | C // G | 1,21E-07    | 2,69E-06    | outlier | 0,021264 | 0,77843 | n.s. | #N/D |
| 16728 | AX-212317283 | Apop_09765  | NW_015441588 | 197397 | T // C | 0,001207727 | 0,008416103 | outlier | 0,022027 | 0,66711 | n.s. | #N/D |
| 2500  | AX-212301787 | Apop_07574  | NW_015441076 | 99148  | C // G | 0,001016111 | 0,007270732 | outlier | 0,021194 | 0,76062 | n.s. | #N/D |
| 2516  | AX-197962697 | Apop_00260  | NW_015441076 | 407362 | C // G | 0,001457675 | 0,009671096 | outlier | 0,023308 | 0,59227 | n.s. | #N/D |
| 4794  | AX-198060548 | Apop_00535  | NW_015441108 | 700479 | T // C | 0,000627877 | 0,004875491 | outlier | 0,02078  | 0,85307 | n.s. | #N/D |
| 19368 | AX-198054606 | Afix_12434  | NW_015442238 | 65687  | T // C | 0,000493817 | 0,004030729 | outlier | 0,021371 | 0,82425 | n.s. | #N/D |
| 17422 | AX-198063142 | Apop_02151  | NW_015441659 | 87575  | A // G | 0,001392268 | 0,009416662 | outlier | 0,020924 | 0,86133 | n.s. | #N/D |
| 17752 | AX-212304237 | Apop_10007  | NW_015441712 | 210033 | T // C | 0,000869624 | 0,006495794 | outlier | 0,020879 | 0,88091 | n.s. | #N/D |
| 3158  | AX-197962828 | Apop_00343  | NW_015441083 | 712286 | T // C | 0,001340833 | 0,009149608 | outlier | 0,028316 | 0,38287 | n.s. | #N/D |
| 13108 | AX-197954984 | Afix_10916  | NW_015441363 | 64072  | T // C | 0,000703909 | 0,005389358 | outlier | 0,021066 | 0,8628  | n.s. | #N/D |
| 16666 | AX-212303972 | Apop_09742  | NW_015441579 | 137781 | C // G | 0,00026906  | 0,002446566 | outlier | 0,020468 | 0,88963 | n.s. | #N/D |
| 11096 | AX-197952870 | Afix_09582  | NW_015441274 | 3585   | C // G | 0,001213366 | 0,008430068 | outlier | 0,020746 | 0,86419 | n.s. | #N/D |

| Protein accession | mRNA accession | Adig genome v. | GO Terms      | KEGG      | SNPEff prediction   | Putative_imp | DNA change  | AA change    | cDNA_position / cDNA_len | CDS_position / CDS_len | Protein_position / Protein_len | Distance to feature: |
|-------------------|----------------|----------------|---------------|-----------|---------------------|--------------|-------------|--------------|--------------------------|------------------------|--------------------------------|----------------------|
| XP_015748225      | : XM_015892739 | aug_v2a.00311  | GO:0005524; G | #N/D      | 3_prime_UTR_variant | MODIFIER     | c.*496T>C   |              |                          |                        |                                | 496                  |
| XP_015750347      | : XM_015894861 | aug_v2a.07121  |               | #N/D      | 3_prime_UTR_variant | MODIFIER     | c.*56A>G    |              |                          |                        |                                | 56                   |
| XP_015751934      | : XM_015896448 |                | #N/D          | #N/D      | 3_prime_UTR_variant | MODIFIER     | c.*207G>C   |              |                          |                        |                                | 207                  |
| XP_015753011      | : XM_015897525 | aug_v2a.16824  |               | #N/D      | 3_prime_UTR_variant | MODIFIER     | c.*2181T>C  |              |                          |                        |                                | 2181                 |
| XP_015753573      | : XM_015898087 | aug_v2a.09315  | GO:0005829; G | K10886    | 3_prime_UTR_variant | MODIFIER     | c.*1733A>G  |              |                          |                        |                                | 1733                 |
| XP_015753644      | : XM_015898158 | aug_v2a.04792  | GO:0016021    | K19370    | 3_prime_UTR_variant | MODIFIER     | c.*866C>G   |              |                          |                        |                                | 866                  |
| XP_015754996      | : XM_015899510 | aug_v2a.17340  | GO:0005524; G | #N/D      | 3_prime_UTR_variant | MODIFIER     | c.*102A>G   |              |                          |                        |                                | 102                  |
| XP_015759041      | : XM_015903555 | aug_v2a.12203  | GO:0030424; G | K05122    | 3_prime_UTR_variant | MODIFIER     | c.*1457A>C  |              |                          |                        |                                | 1457                 |
| XP_015765243      | : XM_015909757 | aug_v2a.15540  |               | #N/D      | 3_prime_UTR_variant | MODIFIER     | c.*34T>C    |              |                          |                        |                                | 34                   |
| XP_015766108      | : XM_015910622 | aug_v2a.06707  | GO:0005912; G | K04237    | 3_prime_UTR_variant | MODIFIER     | c.*109A>G   |              |                          |                        |                                | 109                  |
| XP_015763353      | : XM_015907867 | aug_v2a.21182  | GO:0015629; G | K05700    | 3_prime_UTR_variant | MODIFIER     | c.*257T>C   |              |                          |                        |                                | 257                  |
| XP_015766287      | : XM_015910801 | aug_v2a.01851  | GO:0000932; G | #N/D      | 3_prime_UTR_variant | MODIFIER     | c.*666T>C   |              |                          |                        |                                | 666                  |
| XP_015770102      | : XM_015914616 | aug_v2a.06444  | GO:0005737; G | K08465    | 3_prime_UTR_variant | MODIFIER     | c.*711A>G   |              |                          |                        |                                | 711                  |
| XP_015771951      | : XM_015916465 | aug_v2a.11999  | GO:0030054; G | #N/D      | 3_prime_UTR_variant | MODIFIER     | c.*16T>C    |              |                          |                        |                                | 16                   |
| XP_015773275      | : XM_015917789 | aug_v2a.17397  | GO:0005776; G | K00920    | 3_prime_UTR_variant | MODIFIER     | c.*271A>G   |              |                          |                        |                                | 271                  |
| XP_015773668      | : XM_015918182 |                | #N/D          | #N/D      | 3_prime_UTR_variant | MODIFIER     | c.*160A>G   |              |                          |                        |                                | 160                  |
| XP_015773743      | : XM_015918257 | aug_v2a.09408  | GO:0000139; G | K00738    | 3_prime_UTR_variant | MODIFIER     | c.*857T>G   |              |                          |                        |                                | 857                  |
| XP_015779272      | : XM_015923786 | aug_v2a.08615  |               | #N/D      | 3_prime_UTR_variant | MODIFIER     | c.*48T>G    |              |                          |                        |                                | 48                   |
| XP_015748788      | : XM_015893302 | aug_v2a.15582  | GO:0000139; G | K20293    | intron_variant      | MODIFIER     | c.629-84T>C |              |                          |                        |                                |                      |
| XP_015775865      | : XM_015920379 | aug_v2a.09745  | GO:0000166    | GC K08844 | synonymous_variant  | LOW          | c.5732T>G   | p.Ser1911Ser | 6052/7464                | 5732/6687              | 1911/2228                      |                      |
| XP_015761708      | : XM_015906222 | aug_v2a.01491  | GO:0005737; G | K20402    | 3_prime_UTR_variant | MODIFIER     | c.*45T>G    |              |                          |                        |                                | 45                   |
| XP_015754999      | : XM_015899513 | aug_v2a.17344  | GO:0005829; G | #N/D      | 3_prime_UTR_variant | MODIFIER     | c.*364G>C   |              |                          |                        |                                | 364                  |
| XP_015757455      | : XM_015901969 | aug_v2a.16725  | GO:0000166    | GC K06942 | missense_variant    | MODERATE     | c.1432T>C   | p.Phe478Leu  | 1550/2112                | 1432/1728              | 478/575                        |                      |
| XP_015762529      | : XM_015907043 | aug_v2a.17709  | GO:0016020; G | #N/D      | 3_prime_UTR_variant | MODIFIER     | c.*168G>C   |              |                          |                        |                                | 168                  |
| XP_015756351      | : XM_015900865 | aug_v2a.03461  | GO:0001701    | GC K21436 | synonymous_variant  | LOW          | c.65T>C     | p.Pro22Pro   | 251/2874                 | 65/2688                | 22/895                         |                      |
| XP_015768476      | : XM_015912990 | aug_v2a.05254  | GO:0016021    | #N/D      | 3_prime_UTR_variant | MODIFIER     | c.*213T>C   |              |                          |                        |                                | 213                  |
| XP_015758161      | : XM_015902675 | aug_v2a.06441  | GO:0030424; G | K05126    | 3_prime_UTR_variant | MODIFIER     | c.*315A>C   |              |                          |                        |                                | 315                  |

|              |                |               |            |           |                        |          |            |              |            |            |           |
|--------------|----------------|---------------|------------|-----------|------------------------|----------|------------|--------------|------------|------------|-----------|
| XP_015770883 | : XM_015915397 | aug_v2a.07682 | GO:0003677 | K20478    | synonymous_variant     | LOW      | c.7250T>G  | p.Arg2417Arg | 7260/11892 | 7250/11754 | 2417/3917 |
| XP_015772251 | : XM_015916765 | aug_v2a.14913 | GO:0003677 | GC K05638 | synonymous_variant     | LOW      | c.560T>A   | p.Tyr187Tyr  | 743/2574   | 560/1698   | 187/565   |
| XP_015761721 | : XM_015906235 | aug_v2a.01487 | GO:0034451 | G(K21765  | 3_prime_UTR_variant    | MODIFIER | c.*442G>C  |              |            |            | 442       |
| XP_015749294 | : XM_015893808 | aug_v2a.15185 | #N/D       | K11663    | 3_prime_UTR_variant    | MODIFIER | c.*223C>G  |              |            |            | 223       |
| XP_015751069 | : XM_015895583 | aug_v2a.13882 | GO:0008017 | G(#N/D    | 5_prime_UTR_prematui   | LOW      | c.-32A>G   |              |            |            |           |
| XP_015760868 | : XM_015905382 | aug_v2a.10971 | GO:0072562 | G(K10104  | 5_prime_UTR_prematui   | LOW      | c.-237T>C  |              |            |            |           |
| XP_015766225 | : XM_015910739 | aug_v2a.01852 | GO:0000932 | G(K12035  | 5_prime_UTR_prematui   | LOW      | c.-432A>G  |              |            |            |           |
| XP_015770891 | : XM_015915405 | aug_v2a.14368 | #N/D       | #N/D      | 5_prime_UTR_prematui   | LOW      | c.-6A>G    |              |            |            |           |
| XP_015761706 | : XM_015906220 | aug_v2a.01490 | GO:0003841 | GC K19007 | synonymous_variant     | LOW      | c.344C>G   | p.Arg115Arg  | 417/1082   | 344/951    | 115/316   |
| XP_015755137 | : XM_015899651 | aug_v2a.23924 | #N/D       | #N/D      | 5_prime_UTR_variant    | MODIFIER | c.-29T>C   |              |            |            | 29        |
| XP_015765243 | : XM_015909757 | aug_v2a.15540 | #N/D       | #N/D      | 3_prime_UTR_variant    | MODIFIER | c.*229A>G  |              |            |            | 229       |
| XP_015765243 | : XM_015909757 | aug_v2a.15540 | #N/D       | #N/D      | 3_prime_UTR_variant    | MODIFIER | c.*615A>G  |              |            |            | 615       |
| XP_015763473 | : XM_015907987 | aug_v2a.11997 | GO:0005509 | #N/D      | 5_prime_UTR_variant    | MODIFIER | c.-16T>C   |              |            |            | 16        |
| XP_015766100 | : XM_015910614 | aug_v2a.09265 | #N/D       | #N/D      | 5_prime_UTR_variant    | MODIFIER | c.-89T>C   |              |            |            | 89        |
| XP_015766857 | : XM_015911371 | aug_v2a.11511 | GO:0016021 | #N/D      | 5_prime_UTR_variant    | MODIFIER | c.-40A>T   |              |            |            | 40        |
| XP_015768854 | : XM_015913368 | aug_v2a.07763 | GO:0005634 | G(K14589  | 5_prime_UTR_variant    | MODIFIER | c.-52A>C   |              |            |            | 52        |
| XP_015769258 | : XM_015913772 | aug_v2a.20502 | GO:0005576 | G(K23318  | 5_prime_UTR_variant    | MODIFIER | c.-289A>G  |              |            |            | 1372      |
| XP_015769652 | : XM_015914166 | aug_v2a.10630 | GO:0005622 | G(#N/D    | 5_prime_UTR_variant    | MODIFIER | c.-350T>C  |              |            |            | 350       |
| XP_015776763 | : XM_015921277 | aug_v2a.07275 | GO:0005737 | G(K03440  | 5_prime_UTR_variant    | MODIFIER | c.-469A>G  |              |            |            | 469       |
| XP_015778673 | : XM_015923187 | aug_v2a.17233 | GO:0005634 | G(#N/D    | 5_prime_UTR_variant    | MODIFIER | c.-65A>G   |              |            |            | 65        |
| XP_015780625 | : XM_015925139 | aug_v2a.08859 | GO:0004497 | GC K00488 | synonymous_variant     | LOW      | c.1121A>G  | p.Arg374Arg  | 1287/2076  | 1121/1596  | 374/531   |
| XP_015754395 | : XM_015898909 | aug_v2a.01024 | GO:0032592 | G(K05657  | 5_prime_UTR_prematui   | LOW      | c.-420A>G  |              |            |            |           |
| XP_015765242 | : XM_015909756 | #N/D          | #N/D       | #N/D      | 5_prime_UTR_prematui   | LOW      | c.-56A>G   |              |            |            |           |
| XP_015763165 | : XM_015907679 | aug_v2a.06182 | GO:0004842 | GC K10595 | synonymous_variant     | LOW      | c.3480T>C  | p.Pro1160Pro | 3615/11573 | 3480/11187 | 1160/3728 |
| XP_015763165 | : XM_015907679 | aug_v2a.06182 | GO:0004842 | GC K10595 | synonymous_variant     | LOW      | c.6024A>G  | p.Pro2008Pro | 6159/11573 | 6024/11187 | 2008/3728 |
| XP_015765661 | : XM_015910175 | aug_v2a.17470 | GO:0004857 | #N/D      | splice_region_variant& | LOW      | c.654A>G   | p.Ala218Ala  | 814/1855   | 654/735    | 218/244   |
| XP_015760790 | : XM_015905304 | aug_v2a.24587 | GO:0005737 | G(K09366  | 5_prime_UTR_variant    | MODIFIER | c.-647T>C  |              |            |            | 647       |
| #N/D         | #N/D           | #N/D          | #N/D       | #N/D      | downstream_gene_vari   | MODIFIER | c.*1547A>G |              |            |            | 878       |
| #N/D         | #N/D           | #N/D          | #N/D       | #N/D      | downstream_gene_vari   | MODIFIER | c.*6451T>C |              |            |            | 2197      |

|                             |               |            |           |      |                               |            |             |             |           |           |          |
|-----------------------------|---------------|------------|-----------|------|-------------------------------|------------|-------------|-------------|-----------|-----------|----------|
| #N/D                        | #N/D          | #N/D       | #N/D      | #N/D | downstream_gene_vari MODIFIER | c.*4820C>G |             |             |           |           | 4406     |
| XP_015773513.: XM_015918027 | aug_v2a.00401 | GO:0004871 | GC K04594 |      | synonymous_variant            | LOW        | c.1086T>C   | p.Leu362Leu | 1157/2801 | 1086/1866 | 362/621  |
| XP_015771406.: XM_015915920 | #N/D          | #N/D       | #N/D      | #N/D | 5_prime_UTR_variant           | MODIFIER   | c.-209T>C   |             |           |           | 209      |
| #N/D                        | #N/D          | #N/D       | #N/D      | #N/D | downstream_gene_vari MODIFIER |            | c.*7180A>G  |             |           |           | 1995     |
| #N/D                        | #N/D          | #N/D       | #N/D      | #N/D | downstream_gene_vari MODIFIER |            | c.*4875C>G  |             |           |           | 4501     |
| #N/D                        | #N/D          | #N/D       | #N/D      | #N/D | downstream_gene_vari MODIFIER |            | n.*2934A>G  |             |           |           | 2934     |
| #N/D                        | #N/D          | #N/D       | #N/D      | #N/D | downstream_gene_vari MODIFIER |            | c.*4476A>T  |             |           |           | 3295     |
| #N/D                        | #N/D          | #N/D       | #N/D      | #N/D | downstream_gene_vari MODIFIER |            | c.*3220T>C  |             |           |           | 2285     |
| XP_015761821.: XM_015906335 | aug_v2a.14028 | GO:0005085 | GC K06277 |      | synonymous_variant            | LOW        | c.1260A>C   | p.Gly420Gly | 2843/5193 | 1260/2781 | 420/926  |
| #N/D                        | #N/D          | #N/D       | #N/D      | #N/D | downstream_gene_vari MODIFIER |            | c.*3328A>G  |             |           |           | 343      |
| #N/D                        | #N/D          | #N/D       | #N/D      | #N/D | downstream_gene_vari MODIFIER |            | c.*26589A>T |             |           |           | 4249     |
| #N/D                        | #N/D          | #N/D       | #N/D      | #N/D | downstream_gene_vari MODIFIER |            | c.*11593T>C |             |           |           | 4681     |
| #N/D                        | #N/D          | #N/D       | #N/D      | #N/D | downstream_gene_vari MODIFIER |            | c.*6788T>C  |             |           |           | 621      |
| #N/D                        | #N/D          | #N/D       | #N/D      | #N/D | downstream_gene_vari MODIFIER |            | c.*8343A>G  |             |           |           | 2498     |
| #N/D                        | #N/D          | #N/D       | #N/D      | #N/D | downstream_gene_vari MODIFIER |            | c.*9634A>G  |             |           |           | 3789     |
| #N/D                        | #N/D          | #N/D       | #N/D      | #N/D | downstream_gene_vari MODIFIER |            | c.*2208A>G  |             |           |           | 555      |
| #N/D                        | #N/D          | #N/D       | #N/D      | #N/D | downstream_gene_vari MODIFIER |            | c.*14650A>T |             |           |           | 1007     |
| #N/D                        | #N/D          | #N/D       | #N/D      | #N/D | downstream_gene_vari MODIFIER |            | n.*4731T>G  |             |           |           | 4731     |
| #N/D                        | #N/D          | #N/D       | #N/D      | #N/D | downstream_gene_vari MODIFIER |            | n.*4682T>C  |             |           |           | 4682     |
| #N/D                        | #N/D          | #N/D       | #N/D      | #N/D | downstream_gene_vari MODIFIER |            | c.*20664C>G |             |           |           | 3431     |
| #N/D                        | #N/D          | #N/D       | #N/D      | #N/D | downstream_gene_vari MODIFIER |            | c.*3213T>C  |             |           |           | 516      |
| #N/D                        | #N/D          | #N/D       | #N/D      | #N/D | downstream_gene_vari MODIFIER |            | c.*2447A>G  |             |           |           | 2172     |
| #N/D                        | #N/D          | #N/D       | #N/D      | #N/D | downstream_gene_vari MODIFIER |            | c.*8598C>G  |             |           |           | 4342     |
| #N/D                        | #N/D          | #N/D       | #N/D      | #N/D | downstream_gene_vari MODIFIER |            | n.*527T>G   |             |           |           | 527      |
| #N/D                        | #N/D          | #N/D       | #N/D      | #N/D | downstream_gene_vari MODIFIER |            | n.*2328T>C  |             |           |           | 2328     |
| #N/D                        | #N/D          | #N/D       | #N/D      | #N/D | downstream_gene_vari MODIFIER |            | c.*6041A>G  |             |           |           | 1515     |
| #N/D                        | #N/D          | #N/D       | #N/D      | #N/D | downstream_gene_vari MODIFIER |            | c.*4368C>G  |             |           |           | 4168     |
| #N/D                        | #N/D          | #N/D       | #N/D      | #N/D | downstream_gene_vari MODIFIER |            | c.*42204A>G |             |           |           | 4211     |
| #N/D                        | #N/D          | #N/D       | #N/D      | #N/D | downstream_gene_vari MODIFIER |            | n.*329A>G   |             |           |           | 329      |
| #N/D                        | #N/D          | #N/D       | #N/D      | #N/D | downstream_gene_vari MODIFIER |            | n.*4338T>C  |             |           |           | 4338     |
| #N/D                        | #N/D          | #N/D       | #N/D      | #N/D | downstream_gene_vari MODIFIER |            | n.*1050C>G  |             |           |           | 1050     |
| #N/D                        | #N/D          | #N/D       | #N/D      | #N/D | downstream_gene_vari MODIFIER |            | c.*11023A>T |             |           |           | 1053     |
| #N/D                        | #N/D          | #N/D       | #N/D      | #N/D | downstream_gene_vari MODIFIER |            | c.*13073T>C |             |           |           | 1196     |
| XP_015754071.: XM_015898585 | aug_v2a.13969 | GO:0005198 | GC K04659 |      | synonymous_variant            | LOW        | c.594A>G    | p.Ala198Ala | 594/3274  | 594/3075  | 198/1024 |

|                            |               |            |           |                      |          |              |             |            |           |          |      |
|----------------------------|---------------|------------|-----------|----------------------|----------|--------------|-------------|------------|-----------|----------|------|
| XP_015771269.:XM_015915783 | aug_v2a.19221 | #N/D       | #N/D      | 5_prime_UTR_variant  | MODIFIER | c.-1426G>C   |             |            |           |          | 1426 |
| #N/D                       | #N/D          | #N/D       | #N/D      | downstream_gene_vari | MODIFIER | n.*274A>G    |             |            |           |          | 274  |
| #N/D                       | #N/D          | #N/D       | #N/D      | downstream_gene_vari | MODIFIER | c.*3217T>G   |             |            |           |          | 2773 |
| XP_015754993.:XM_015899507 | aug_v2a.10966 | GO:0005215 | GC K14638 | missense_variant     | MODERATE | c.436A>G     | p.Asn146Asp | 1306/2811  | 436/1554  | 146/517  |      |
| #N/D                       | #N/D          | #N/D       | #N/D      | downstream_gene_vari | MODIFIER | c.*8444T>C   |             |            |           |          | 4084 |
| #N/D                       | #N/D          | #N/D       | #N/D      | downstream_gene_vari | MODIFIER | c.*4588T>G   |             |            |           |          | 4357 |
| #N/D                       | #N/D          | #N/D       | #N/D      | downstream_gene_vari | MODIFIER | c.*2729T>C   |             |            |           |          | 2413 |
| XP_015760757.:XM_015905271 | aug_v2a.24586 | GO:0005488 | GC        | synonymous_variant   | LOW      | c.1022T>C    | p.Ala341Ala | 1356/10573 | 1022/9609 | 341/3202 |      |
| #N/D                       | #N/D          | #N/D       | #N/D      | downstream_gene_vari | MODIFIER | c.*37786A>C  |             |            |           |          | 1419 |
| XP_015755542.:XM_015900056 | aug_v2a.10189 | GO:0005509 | GC K17341 | synonymous_variant   | LOW      | c.1032A>C    | p.Ile344Ile | 1049/2002  | 1032/1767 | 344/588  |      |
| #N/D                       | #N/D          | #N/D       | #N/D      | downstream_gene_vari | MODIFIER | c.*14168A>T  |             |            |           |          | 3797 |
| #N/D                       | #N/D          | #N/D       | #N/D      | downstream_gene_vari | MODIFIER | n.*3808T>C   |             |            |           |          | 3808 |
| #N/D                       | #N/D          | #N/D       | #N/D      | downstream_gene_vari | MODIFIER | c.*27201A>G  |             |            |           |          | 4861 |
| #N/D                       | #N/D          | #N/D       | #N/D      | downstream_gene_vari | MODIFIER | n.*1108T>G   |             |            |           |          | 1108 |
| #N/D                       | #N/D          | #N/D       | #N/D      | intergenic_region    | MODIFIER |              |             |            |           |          |      |
| #N/D                       | #N/D          | #N/D       | #N/D      | intergenic_region    | MODIFIER | n.134642C>G  |             |            |           |          |      |
| #N/D                       | #N/D          | #N/D       | #N/D      | intergenic_region    | MODIFIER | n.43692A>C   |             |            |           |          |      |
| #N/D                       | #N/D          | #N/D       | #N/D      | intergenic_region    | MODIFIER | n.92786A>G   |             |            |           |          |      |
| #N/D                       | #N/D          | #N/D       | #N/D      | intergenic_region    | MODIFIER | n.702995A>G  |             |            |           |          |      |
| #N/D                       | #N/D          | #N/D       | #N/D      | intergenic_region    | MODIFIER | n.684750A>C  |             |            |           |          |      |
| #N/D                       | #N/D          | #N/D       | #N/D      | intergenic_region    | MODIFIER | n.33162T>C   |             |            |           |          |      |
| #N/D                       | #N/D          | #N/D       | #N/D      | intergenic_region    | MODIFIER | n.3564T>C    |             |            |           |          |      |
| #N/D                       | #N/D          | #N/D       | #N/D      | intergenic_region    | MODIFIER | n.447531A>G  |             |            |           |          |      |
| #N/D                       | #N/D          | #N/D       | #N/D      | intergenic_region    | MODIFIER | n.185399T>C  |             |            |           |          |      |
| #N/D                       | #N/D          | #N/D       | #N/D      | intergenic_region    | MODIFIER | n.130092A>C  |             |            |           |          |      |
| #N/D                       | #N/D          | #N/D       | #N/D      | intergenic_region    | MODIFIER | n.512200C>G  |             |            |           |          |      |
| #N/D                       | #N/D          | #N/D       | #N/D      | intergenic_region    | MODIFIER | n.153101A>G  |             |            |           |          |      |
| #N/D                       | #N/D          | #N/D       | #N/D      | intergenic_region    | MODIFIER | n.466817T>C  |             |            |           |          |      |
| #N/D                       | #N/D          | #N/D       | #N/D      | intergenic_region    | MODIFIER | n.4328A>G    |             |            |           |          |      |
| #N/D                       | #N/D          | #N/D       | #N/D      | intergenic_region    | MODIFIER | n.2074347A>C |             |            |           |          |      |
| #N/D                       | #N/D          | #N/D       | #N/D      | intergenic_region    | MODIFIER | n.2072842T>G |             |            |           |          |      |
| #N/D                       | #N/D          | #N/D       | #N/D      | intergenic_region    | MODIFIER | n.289067C>G  |             |            |           |          |      |
| #N/D                       | #N/D          | #N/D       | #N/D      | intergenic_region    | MODIFIER | n.2069866A>G |             |            |           |          |      |
| #N/D                       | #N/D          | #N/D       | #N/D      | intergenic_region    | MODIFIER | n.375272A>C  |             |            |           |          |      |

|                             |               |             |           |      |                         |          |                |                                            |
|-----------------------------|---------------|-------------|-----------|------|-------------------------|----------|----------------|--------------------------------------------|
| #N/D                        | #N/D          | #N/D        | #N/D      | #N/D | intergenic_region       | MODIFIER | n.369986A>C    |                                            |
| #N/D                        | #N/D          | #N/D        | #N/D      | #N/D | intergenic_region       | MODIFIER | n.186700T>G    |                                            |
| #N/D                        | #N/D          | #N/D        | #N/D      | #N/D | intergenic_region       | MODIFIER | n.86395T>C     |                                            |
| #N/D                        | #N/D          | #N/D        | #N/D      | #N/D | intergenic_region       | MODIFIER | n.97513C>G     |                                            |
| #N/D                        | #N/D          | #N/D        | #N/D      | #N/D | intergenic_region       | MODIFIER | n.370272A>C    |                                            |
| #N/D                        | #N/D          | #N/D        | #N/D      | #N/D | intergenic_region       | MODIFIER | n.75620A>C     |                                            |
| #N/D                        | #N/D          | #N/D        | #N/D      | #N/D | intergenic_region       | MODIFIER | n.42830A>G     |                                            |
| XP_015767513.: XM_015912027 | aug_v2a.09920 | GO:0005524; | Gc K17916 |      | synonymous_variant      | LOW      | c.3054T>C      | p.Thr1018Thr 3054/3603 3054/3603 1018/1200 |
| #N/D                        | #N/D          | #N/D        | #N/D      | #N/D | downstream_gene_vari    | MODIFIER | n.*1357T>C     | 1357                                       |
| #N/D                        | #N/D          | #N/D        | #N/D      | #N/D | downstream_gene_vari    | MODIFIER | n.*3299T>G     | 3299                                       |
| #N/D                        | #N/D          | #N/D        | #N/D      | #N/D | intergenic_region       | MODIFIER | n.79755T>C     |                                            |
| #N/D                        | #N/D          | #N/D        | #N/D      | #N/D | intergenic_region       | MODIFIER | n.333318C>G    |                                            |
| #N/D                        | #N/D          | #N/D        | #N/D      | #N/D | intergenic_region       | MODIFIER | n.11900A>G     |                                            |
| #N/D                        | #N/D          | #N/D        | #N/D      | #N/D | intergenic_region       | MODIFIER |                |                                            |
| XP_015757452.: XM_015901966 | aug_v2a.16722 | GO:0005634; | Gc K09372 |      | intron_variant          | MODIFIER | c.805+275T>C   |                                            |
| #N/D                        | #N/D          | #N/D        | #N/D      | #N/D | intragenic_variant      | MODIFIER | n.15998A>T     |                                            |
| #N/D                        | #N/D          | #N/D        | #N/D      | #N/D | intergenic_region       | MODIFIER | n.254569T>C    |                                            |
| XP_015773399.: XM_015917913 | aug_v2a.12815 | GO:0005634; | Gc #N/D   |      | 3_prime_UTR_variant     | MODIFIER | c.*524A>G      | 524                                        |
| XP_015766763.: XM_015911277 | aug_v2a.15593 | GO:0005730; | Gc K14856 |      | splice_region_variant&i | LOW      | c.1962+8A>G    |                                            |
| #N/D                        | #N/D          | #N/D        | #N/D      | #N/D | intergenic_region       | MODIFIER | n.389135A>T    |                                            |
| XP_015760790.: XM_015905304 | aug_v2a.24587 | GO:0005737; | Gc K09366 |      | 5_prime_UTR_variant     | MODIFIER | c.-1388A>G     | 1388                                       |
| #N/D                        | #N/D          | #N/D        | #N/D      | #N/D | intergenic_region       | MODIFIER | n.4960T>C      |                                            |
| XP_015778515.: XM_015923029 | aug_v2a.20235 | GO:0005737; | Gc #N/D   |      | intron_variant          | MODIFIER | c.207+230T>A   |                                            |
| XP_015754070.: XM_015898584 | aug_v2a.14607 | GO:0005737; | Gc K06838 |      | intron_variant          | MODIFIER | c.1560-2234T>G |                                            |
| XP_015754070.: XM_015898584 | aug_v2a.14607 | GO:0005737; | Gc K06838 |      | intron_variant          | MODIFIER | c.885-680A>T   |                                            |
| #N/D                        | #N/D          | #N/D        | #N/D      | #N/D | intergenic_region       | MODIFIER | n.98378A>G     |                                            |
| #N/D                        | #N/D          | #N/D        | #N/D      | #N/D | intragenic_variant      | MODIFIER | n.1006913T>C   |                                            |
| XP_015754070.: XM_015898584 | aug_v2a.14607 | GO:0005737; | Gc K06838 |      | splice_region_variant&i | LOW      | c.1914-3T>C    |                                            |
| XP_015759566.: XM_015904080 | aug_v2a.22531 | GO:0005739; | Gc K00814 |      | intron_variant          | MODIFIER | c.445-37T>G    |                                            |
| XP_015759591.: XM_015904105 | aug_v2a.09212 | GO:0003676; | Gc #N/D   |      | intron_variant          | MODIFIER | c.631-132G>C   |                                            |
| XP_015772585.: XM_015917099 | aug_v2a.04543 | GO:0005576; | Gc K05129 |      | intron_variant          | MODIFIER | c.946+1615A>G  |                                            |
| XP_015758379.: XM_015902893 | aug_v2a.12633 | GO:0005576; | Gc #N/D   |      | intron_variant          | MODIFIER | c.-3-1286T>C   |                                            |
| XP_015760851.: XM_015905365 | aug_v2a.05383 | GO:0005622; | Gc #N/D   |      | intron_variant          | MODIFIER | c.1183-206A>G  |                                            |
| XP_015765248.: XM_015909762 | aug_v2a.03315 | GO:0005829; | Gc #N/D   |      | intron_variant          | MODIFIER | c.-45+649T>C   |                                            |

|                            |               |                       |                     |          |                |             |           |                   |
|----------------------------|---------------|-----------------------|---------------------|----------|----------------|-------------|-----------|-------------------|
| XP_015747454.:XM_015891968 | aug_v2a.03778 | GO:0005737; G( K08129 | intron_variant      | MODIFIER | c.62+1412A>G   |             |           |                   |
| XP_015748494.:XM_015893008 | aug_v2a.03123 | GO:0005813; G( #N/D   | intron_variant      | MODIFIER | c.547-72T>C    |             |           |                   |
| XP_015748596.:XM_015893110 | aug_v2a.06535 | GO:0005622; G( K14416 | intron_variant      | MODIFIER | c.671+67A>G    |             |           |                   |
| XP_015780736.:XM_015925250 | aug_v2a.10426 | GO:0005886 G( #N/D    | synonymous_variant  | LOW      | c.2385T>C      | p.Val795Val | 2432/3390 | 2385/2856 795/951 |
| XP_015762588.:XM_015907102 | aug_v2a.07127 | GO:0005622; G( K08813 | intron_variant      | MODIFIER | c.300+13A>G    |             |           |                   |
| XP_015749399.:XM_015893913 | #N/D          | #N/D #N/D             | intron_variant      | MODIFIER | c.-60+106A>G   |             |           |                   |
| XP_015749946.:XM_015894460 | aug_v2a.13919 | GO:0005634; G( K09216 | intron_variant      | MODIFIER | c.100+160A>G   |             |           |                   |
| XP_015750990.:XM_015895504 | aug_v2a.11167 | GO:0042584; G( K23924 | intron_variant      | MODIFIER | c.-4-144G>C    |             |           |                   |
| XP_015751166.:XM_015895680 | aug_v2a.02852 | GO:0005813; G( K11584 | intron_variant      | MODIFIER | c.938+2915T>C  |             |           |                   |
| XP_015751371.:XM_015895885 | aug_v2a.02085 | GO:0043231; G( K20091 | intron_variant      | MODIFIER | c.191+2163A>G  |             |           |                   |
| XP_015751395.:XM_015895909 | aug_v2a.20705 | GO:0005829; G( K09048 | intron_variant      | MODIFIER | c.519+33T>G    |             |           |                   |
| XP_015752405.:XM_015896919 | aug_v2a.15260 | GO:0031410; G( K04728 | intron_variant      | MODIFIER | c.8610+414T>C  |             |           |                   |
| XP_015752627.:XM_015897141 | aug_v2a.02121 | GO:0005737; G( K12233 | intron_variant      | MODIFIER | c.1918-238T>C  |             |           |                   |
| XP_015752778.:XM_015897292 | aug_v2a.12207 | GO:0005737; G( K13752 | intron_variant      | MODIFIER | c.442+190T>A   |             |           |                   |
| XP_015752937.:XM_015897451 | aug_v2a.07078 | GO:0005604; G( K23383 | intron_variant      | MODIFIER | c.5445+315A>G  |             |           |                   |
| XP_015753525.:XM_015898039 | aug_v2a.16181 | GO:0016021 #N/D       | intron_variant      | MODIFIER | c.648+8050T>C  |             |           |                   |
| XP_015754071.:XM_015898585 | aug_v2a.13969 | GO:0031012; G( K04659 | intron_variant      | MODIFIER | c.1357-633T>G  |             |           |                   |
| XP_015775618.:XM_015920132 | aug_v2a.04700 | GO:0005887; G( #N/D   | intron_variant      | MODIFIER | c.507+31T>A    |             |           |                   |
| XP_015754071.:XM_015898585 | aug_v2a.13969 | GO:0031012; G( K04659 | intron_variant      | MODIFIER | c.2032-179T>G  |             |           |                   |
| XP_015754149.:XM_015898663 | aug_v2a.16129 | GO:0019901; G( K16831 | intron_variant      | MODIFIER | c.983-177A>G   |             |           |                   |
| XP_015754445.:XM_015898959 | aug_v2a.01025 | GO:0005615; G( K21283 | intron_variant      | MODIFIER | c.-128-1352T>C |             |           |                   |
| XP_015755646.:XM_015900160 | aug_v2a.01326 | GO:0007165 #N/D       | intron_variant      | MODIFIER | c.*34-246A>G   |             |           |                   |
| XP_015755730.:XM_015900244 | aug_v2a.00533 | GO:0016323; G( K05665 | intron_variant      | MODIFIER | c.1437+59A>G   |             |           |                   |
| XP_015756579.:XM_015901093 | aug_v2a.18002 | GO:0005887; G( K04905 | intron_variant      | MODIFIER | c.437-1562T>G  |             |           |                   |
| XP_015757012.:XM_015901526 | aug_v2a.11065 | GO:0017101; G( K14163 | intron_variant      | MODIFIER | c.3468+85A>G   |             |           |                   |
| XP_015760757.:XM_015905271 | aug_v2a.24586 | GO:0005938; G( #N/D   | 5_prime_UTR_variant | MODIFIER | c.-10T>C       |             |           |                   |
| XP_015757453.:XM_015901967 | aug_v2a.16723 | GO:0005694; G( K14787 | intron_variant      | MODIFIER | c.2391+82G>C   |             |           |                   |

|                            |               |                       |                |          |                |
|----------------------------|---------------|-----------------------|----------------|----------|----------------|
| XP_015757955.:XM_015902469 | aug_v2a.14055 | GO:0016323; G( #N/D   | intron_variant | MODIFIER | c.2254-129T>G  |
| XP_015780738.:XM_015925252 | aug_v2a.10427 | GO:0005634; G( #N/D   | intron_variant | MODIFIER | c.494+131A>G   |
| XP_015754070.:XM_015898584 | aug_v2a.14607 | GO:0005737; G( K06838 | intron_variant | MODIFIER | c.1560-3316A>C |
| XP_015754070.:XM_015898584 | aug_v2a.14607 | GO:0005737; G( K06838 | intron_variant | MODIFIER | c.2058-285A>G  |
| XP_015758645.:XM_015903159 | aug_v2a.06770 | GO:0005634; G( K03124 | intron_variant | MODIFIER | c.517+75A>C    |
| XP_015776996.:XM_015921510 | aug_v2a.11702 | GO:0005783; G( K10661 | intron_variant | MODIFIER | c.1302+48A>G   |
| XP_015758694.:XM_015903208 | aug_v2a.24129 | GO:0031410; G( K10356 | intron_variant | MODIFIER | c.2741+2705A>T |
| XP_015758816.:XM_015903330 | aug_v2a.16964 | GO:0005578; G( K08626 | intron_variant | MODIFIER | c.1930-750A>G  |
| XP_015758965.:XM_015903479 | aug_v2a.13150 | GO:0008622; G( K02324 | intron_variant | MODIFIER | c.1680+326T>C  |
| XP_015759041.:XM_015903555 | aug_v2a.12203 | GO:0030424; G( K05122 | intron_variant | MODIFIER | c.281+2642T>C  |
| XP_015759104.:XM_015903618 | aug_v2a.06747 | GO:0005884; G( #N/D   | intron_variant | MODIFIER | c.1143+76T>C   |
| XP_015759464.:XM_015903978 | aug_v2a.02339 | GO:0005901; G( K22125 | intron_variant | MODIFIER | c.3877-224A>G  |
| XP_015760444.:XM_015904958 | aug_v2a.04473 | GO:0071889; G( K20360 | intron_variant | MODIFIER | c.1267+62A>G   |
| XP_015769014.:XM_015913528 | aug_v2a.03037 | GO:0015629; G( K05700 | intron_variant | MODIFIER | c.259-70T>G    |
| XP_015760851.:XM_015905365 | aug_v2a.05383 | GO:0005622; G( #N/D   | intron_variant | MODIFIER | c.710+66T>C    |
| XP_015760957.:XM_015905471 | aug_v2a.17494 | GO:0016021 K23879     | intron_variant | MODIFIER | c.-4+535A>T    |
| XP_015761455.:XM_015905969 | aug_v2a.08768 | GO:0005737; G( K14689 | intron_variant | MODIFIER | c.612-422A>G   |
| XP_015769014.:XM_015913528 | aug_v2a.03037 | GO:0015629; G( K05700 | intron_variant | MODIFIER | c.3758+57C>G   |
| XP_015763013.:XM_015907527 | aug_v2a.07326 | GO:0005929; G( #N/D   | intron_variant | MODIFIER | c.1527+34T>C   |
| XP_015763170.:XM_015907684 | aug_v2a.19674 | GO:0005615; G( K01374 | intron_variant | MODIFIER | c.664-378T>C   |
| XP_015747368.:XM_015891882 | aug_v2a.06843 | GO:0005789; G( K00710 | intron_variant | MODIFIER | c.623-82T>C    |
| XP_015763201.:XM_015907715 | aug_v2a.01744 | GO:0005524; G( K05305 | intron_variant | MODIFIER | c.223-77A>G    |
| XP_015764002.:XM_015908516 | aug_v2a.09304 | GO:0016021; G( K02842 | intron_variant | MODIFIER | c.-388+633C>G  |
| XP_015764161.:XM_015908675 | aug_v2a.20457 | GO:0005509 K23851     | intron_variant | MODIFIER | c.758+15G>C    |
| XP_015764975.:XM_015909489 | aug_v2a.05494 | GO:0016604; G( K14947 | intron_variant | MODIFIER | c.381+15C>G    |
| XP_015765248.:XM_015909762 | aug_v2a.03315 | GO:0005829; G( #N/D   | intron_variant | MODIFIER | c.-45+1909T>C  |
| XP_015765248.:XM_015909762 | aug_v2a.03315 | GO:0005829; G( #N/D   | intron_variant | MODIFIER | c.-45+1149T>C  |
| XP_015777828.:XM_015922342 | aug_v2a.14263 | GO:0005887; G( K04984 | intron_variant | MODIFIER | c.1419+270A>G  |
| XP_015765333.:XM_015909847 | aug_v2a.16083 | #N/D #N/D             | intron_variant | MODIFIER | c.779+231T>C   |

|                            |               |             |           |                     |          |                 |             |          |         |         |
|----------------------------|---------------|-------------|-----------|---------------------|----------|-----------------|-------------|----------|---------|---------|
| XP_015765352.:XM_015909866 | aug_v2a.10335 | #N/D        | #N/D      | intron_variant      | MODIFIER | c.747+1377A>G   |             |          |         |         |
| XP_015768520.:XM_015913034 | aug_v2a.11053 | GO:0009986; | G( K02583 | intron_variant      | MODIFIER | c.838+1375T>G   |             |          |         |         |
| XP_015766117.:XM_015910631 | aug_v2a.20459 | GO:0015629; | G( K05700 | intron_variant      | MODIFIER | c.1864-31A>G    |             |          |         |         |
| XP_015763046.:XM_015907560 | aug_v2a.13646 | GO:0015629; | G( K05700 | intron_variant      | MODIFIER | c.857-79C>G     |             |          |         |         |
| XP_015780485.:XM_015924999 | aug_v2a.01298 | GO:0015629; | G( K05700 | intron_variant      | MODIFIER | c.353-427T>C    |             |          |         |         |
| XP_015771671.:XM_015916185 | aug_v2a.21581 | GO:0015629; | G( K05700 | intron_variant      | MODIFIER | c.287+274A>G    |             |          |         |         |
| XP_015778941.:XM_015923455 | aug_v2a.09473 | GO:0015629; | G( K05700 | intron_variant      | MODIFIER | c.2220+223A>T   |             |          |         |         |
| XP_015773281.:XM_015917795 | aug_v2a.09602 | GO:0015629; | G( K05700 | intron_variant      | MODIFIER | c.1515+526T>C   |             |          |         |         |
| XP_015758988.:XM_015903502 | aug_v2a.12922 | GO:0015629; | G( K05700 | intron_variant      | MODIFIER | c.2403+33A>G    |             |          |         |         |
| XP_015766285.:XM_015910799 | aug_v2a.01853 | GO:0015629; | G( K05700 | intron_variant      | MODIFIER | c.1330+189C>G   |             |          |         |         |
| XP_015767289.:XM_015911803 | aug_v2a.10178 | GO:0015629; | G( K05700 | intron_variant      | MODIFIER | c.329+2117A>G   |             |          |         |         |
| XP_015778671.:XM_015923185 | aug_v2a.17055 | GO:0015629; | G( K05700 | intron_variant      | MODIFIER | c.860-231T>C    |             |          |         |         |
| XP_015766299.:XM_015910813 | aug_v2a.23156 | GO:0005604; | G( #N/D   | intron_variant      | MODIFIER | c.5336-14430G>C |             |          |         |         |
| XP_015768473.:XM_015912987 | aug_v2a.05254 | GO:0016021  | #N/D      | synonymous_variant  | LOW      | c.513A>G        | p.Ser171Ser | 830/1236 | 513/552 | 171/183 |
| XP_015775122.:XM_015919636 | aug_v2a.07618 | GO:0015629; | G( K05700 | intron_variant      | MODIFIER | c.1995-314A>G   |             |          |         |         |
| XP_015767513.:XM_015912027 | aug_v2a.09920 | GO:0005524; | G( K17916 | intron_variant      | MODIFIER | c.1376+304A>C   |             |          |         |         |
| XP_015767528.:XM_015912042 | aug_v2a.09647 | #N/D        | #N/D      | intron_variant      | MODIFIER | c.1189-308G>C   |             |          |         |         |
| XP_015776239.:XM_015920753 | aug_v2a.05694 | GO:0016021; | G( K05126 | 3_prime_UTR_variant | MODIFIER | c.*362A>G       |             |          |         |         |
| XP_015768732.:XM_015913246 | aug_v2a.10096 | GO:0016021  | #N/D      | intron_variant      | MODIFIER | c.549+365T>C    |             |          |         |         |
| XP_015765331.:XM_015909845 | aug_v2a.06109 | GO:0015629; | G( K05700 | intron_variant      | MODIFIER | c.15+190A>G     |             |          |         |         |
| XP_015769652.:XM_015914166 | aug_v2a.10630 | GO:0005622; | G( #N/D   | intron_variant      | MODIFIER | c.1699+134A>C   |             |          |         |         |
| XP_015748571.:XM_015893085 | aug_v2a.23754 | GO:0016021; | G( K08465 | intron_variant      | MODIFIER | c.-309+294A>C   |             |          |         |         |
| XP_015770190.:XM_015914704 | aug_v2a.06470 | GO:0005509  | K17307    | intron_variant      | MODIFIER | c.70-445G>C     |             |          |         |         |
| XP_015770715.:XM_015915229 | aug_v2a.21189 | GO:0016020; | G( K11165 | intron_variant      | MODIFIER | c.241-317A>C    |             |          |         |         |
| XP_015771333.:XM_015915847 | aug_v2a.06849 | GO:0000145; | G( K06110 | intron_variant      | MODIFIER | c.1247+15T>C    |             |          |         |         |
| XP_015772270.:XM_015916784 | aug_v2a.14916 | GO:0016021  | #N/D      | intron_variant      | MODIFIER | c.747-24A>G     |             |          |         |         |
| XP_015772562.:XM_015917076 | aug_v2a.02792 | #N/D        | #N/D      | intron_variant      | MODIFIER | c.36-27768A>G   |             |          |         |         |
| XP_015774674.:XM_015919188 | aug_v2a.06219 | GO:0015629; | G( K05700 | intron_variant      | MODIFIER | c.61-77A>G      |             |          |         |         |
| XP_015772562.:XM_015917076 | aug_v2a.02792 | #N/D        | #N/D      | intron_variant      | MODIFIER | c.36-22172T>C   |             |          |         |         |

|                            |                             |                |        |                     |          |                |
|----------------------------|-----------------------------|----------------|--------|---------------------|----------|----------------|
| XP_015780817.:XM_015925331 | aug_v2a.06122               | GO:0016021     | K07380 | intron_variant      | MODIFIER | c.1147+847T>C  |
| XP_015773377.:XM_015917891 | aug_v2a.16851               | GO:0005634; G( | K04682 | intron_variant      | MODIFIER | c.231-158T>A   |
| XP_015773395.:XM_015917909 | aug_v2a.12812               | #N/D           | #N/D   | intron_variant      | MODIFIER | c.1613-728T>C  |
| XP_015773443.:XM_015917957 | aug_v2a.05097               | GO:0048786; G( | K14803 | intron_variant      | MODIFIER | c.686-96T>C    |
| XP_015773509.:XM_015918023 | aug_v2a.23754               | GO:0016021; G( | K08465 | intron_variant      | MODIFIER | c.1063-196A>C  |
| XP_015771534.:XM_015916048 | aug_v2a.05253               | GO:0016324; G( | #N/D   | intron_variant      | MODIFIER | c.81+4058A>T   |
| XP_015752125.:XM_015896639 | aug_v2a.02830               | GO:0016021; G( | K04987 | intron_variant      | MODIFIER | c.3442-177A>G  |
| XP_015774341.:XM_015918855 | aug_v2a.11078               | GO:0005794; G( | K08874 | intron_variant      | MODIFIER | c.2836-40T>C   |
| XP_015774551.:XM_015919065 | aug_v2a.05342               | #N/D           | #N/D   | intron_variant      | MODIFIER | c.110+3979A>G  |
| XP_015748571.:XM_015893085 | aug_v2a.23754               | GO:0016021; G( | K08465 | intron_variant      | MODIFIER | c.-180+307T>C  |
| XP_015775080.:XM_015919594 | aug_v2a.10768               | GO:0005096; G( | #N/D   | intron_variant      | MODIFIER | c.1810+4634G>C |
| XP_015775208.:XM_015919722 | aug_v2a.11976               | GO:0005576; G( | K14616 | intron_variant      | MODIFIER | c.1064-321A>C  |
| XP_015775348.:XM_015919862 | aug_v2a.12680               | GO:0005576; G( | #N/D   | intron_variant      | MODIFIER | c.-39-2696T>G  |
| XP_015775476.:XM_015919990 | aug_v2a.09570               | GO:0016021; G( | K14315 | intron_variant      | MODIFIER | c.1318-85C>G   |
| XP_015770781.:XM_015915295 | aug_v2a.12439               | GO:0016021; G( | K04988 | intron_variant      | MODIFIER | c.638+134T>C   |
| XP_015775823.:XM_015920337 | aug_v2a.12763               | #N/D           | #N/D   | intron_variant      | MODIFIER | c.1248-2021A>G |
| XP_015776386.:XM_015920900 | aug_v2a.18202               | GO:0005783; G( | K09866 | intron_variant      | MODIFIER | c.1020+266A>G  |
| XP_015776505.:XM_015921019 | aug_v2a.11224               | GO:0031012; G( | #N/D   | intron_variant      | MODIFIER | c.2470+405T>A  |
| XP_015773513.:XM_015918027 | aug_v2a.00401               | GO:0030424; G( | K04594 | 3_prime_UTR_variant | MODIFIER | c.*3T>C        |
| XP_015758694.:XM_015903208 | aug_v2a.24129               | GO:0031410; G( | K10356 | intron_variant      | MODIFIER | c.2741+941A>G  |
| XP_015778358.:XM_015922872 | aug_v2a.14238               | GO:0005887; G( | K03320 | intron_variant      | MODIFIER | c.-31+1339T>A  |
| XP_015754101.:XM_015898615 | aug_v2a.15790               | GO:0030054; G( | K04615 | intron_variant      | MODIFIER | c.1664+404A>C  |
| XP_015778550.:XM_015923064 | aug_v2a.00480               | GO:0005737; G( | K01025 | intron_variant      | MODIFIER | c.594+69A>T    |
| XP_015779430.:XM_015923944 | aug_v2a.16031               | GO:0016021     | #N/D   | intron_variant      | MODIFIER | c.470-154A>G   |
| XP_015779566.:XM_015924080 | aug_v2a.20129               | GO:0005634; G( | #N/D   | intron_variant      | MODIFIER | c.27-83A>G     |
| XP_015758162.:XM_015902676 | aug_v2a.06441               | GO:0030424; G( | K05126 | intron_variant      | MODIFIER | c.783+314C>G   |
| #N/D                       | XR_001560406.:aug_v2a.13508 | GO:0031012; G( | #N/D   | intron_variant      | MODIFIER | n.762-78A>T    |
| #N/D                       | XR_001563270.:#N/D          | #N/D           | #N/D   | intron_variant      | MODIFIER | n.472-2678A>G  |
| #N/D                       | XR_001564224.:aug_v2a.14365 | GO:0016323; G( | K05665 | intron_variant      | MODIFIER | n.419-482A>G   |
| #N/D                       | XR_001564779.:aug_v2a.09680 | GO:0016021     | #N/D   | intron_variant      | MODIFIER | n.443+43A>G    |

|               |               |               |                |        |                      |          |                 |              |           |           |           |      |
|---------------|---------------|---------------|----------------|--------|----------------------|----------|-----------------|--------------|-----------|-----------|-----------|------|
| #N/D          | XR_001565393. | aug_v2a.08343 | GO:0005737; Gc | K00461 | intron_variant       | MODIFIER | n.225-141T>A    |              |           |           |           |      |
| #N/D          | XR_001565502. | #N/D          | #N/D           | #N/D   | intron_variant       | MODIFIER | n.990+3050A>G   |              |           |           |           |      |
| #N/D          | XR_001565798. | aug_v2a.11999 | GO:0030054; Gc | #N/D   | intron_variant       | MODIFIER | n.534+122T>C    |              |           |           |           |      |
| #N/D          | XR_001565798. | aug_v2a.11999 | GO:0030054; Gc | #N/D   | intron_variant       | MODIFIER | n.834+239T>C    |              |           |           |           |      |
| #N/D          | #N/D          | #N/D          | #N/D           | #N/D   | intron_variant       | MODIFIER | n.2384-119A>G   |              |           |           |           |      |
| XP_015755672. | XM_015900186  | aug_v2a.05185 | GO:0034703; Gc | K04984 | intron_variant       | MODIFIER | c.2061-332A>C   |              |           |           |           |      |
| XP_015761721. | XM_015906235  | aug_v2a.01487 | GO:0034451; Gc | K21765 | synonymous_variant   | LOW      | c.639T>A        | p.Thr213Thr  | 979/1927  | 639/906   | 213/301   |      |
| XP_015773521. | XM_015918035  | aug_v2a.04308 | #N/D           | #N/D   | intron_variant       | MODIFIER | c.1626+19043T>C |              |           |           |           |      |
| XP_015773521. | XM_015918035  | aug_v2a.04308 | #N/D           | #N/D   | intron_variant       | MODIFIER | c.1113+139A>G   |              |           |           |           |      |
| XP_015773521. | XM_015918035  | aug_v2a.04308 | #N/D           | #N/D   | intron_variant       | MODIFIER | c.1114-6376G>C  |              |           |           |           |      |
| XP_015747200. | XM_015891714  | aug_v2a.06768 | GO:0000166 GC  | K09680 | missense_variant     | MODERATE | c.1757A>C       | p.Asp586Ala  | 1882/2188 | 1757/1932 | 586/643   |      |
| XP_015752866. | XM_015897380  | aug_v2a.02856 | #N/D           | #N/D   | missense_variant     | MODERATE | c.1189A>G       | p.Thr397Ala  | 1306/2175 | 1189/2058 | 397/685   |      |
| XP_015753605. | XM_015898119  | aug_v2a.20275 | GO:0001756 GC  | K05463 | missense_variant     | MODERATE | c.20A>C         | p.Gln7Pro    | 289/1340  | 20/834    | 7/277     |      |
| XP_015753654. | XM_015898168  | aug_v2a.04794 | GO:0005737 GC  | K19363 | missense_variant     | MODERATE | c.218A>G        | p.Glu73Gly   | 299/768   | 218/438   | 73/145    |      |
| XP_015765531. | XM_015910045  | aug_v2a.04222 | #N/D           | K23368 | intron_variant       | MODIFIER | c.1392+102T>G   |              |           |           |           |      |
| XP_015774694. | XM_015919208  | aug_v2a.06220 | #N/D           | #N/D   | intron_variant       | MODIFIER | c.208-58A>G     |              |           |           |           |      |
| XP_015758104. | XM_015902618  | aug_v2a.06443 | #N/D           | #N/D   | intron_variant       | MODIFIER | c.466-78A>G     |              |           |           |           |      |
| XP_015758965. | XM_015903479  | aug_v2a.13150 | GO:0000166 GC  | K02324 | missense_variant     | MODERATE | c.4864T>A       | p.Tyr1622Asn | 5052/6921 | 4864/6456 | 1622/2151 |      |
| XP_015760268. | XM_015904782  | aug_v2a.18643 | #N/D           | K20478 | missense_variant     | MODERATE | c.6498A>C       | p.Glu2166Asp | 6550/9051 | 6498/8493 | 2166/2830 |      |
| XP_015763164. | XM_015907678  | aug_v2a.06181 | GO:0003682 GC  | K17495 | missense_variant     | MODERATE | c.428A>G        | p.Asn143Ser  | 428/1062  | 428/1062  | 143/353   |      |
| XP_015764021. | XM_015908535  | aug_v2a.09307 | GO:0005506 GC  | K16914 | missense_variant     | MODERATE | c.313A>T        | p.Met105Leu  | 358/501   | 313/456   | 105/151   |      |
| XP_015764558. | XM_015909072  | aug_v2a.17807 | GO:0000166 GC  | K13431 | missense_variant     | MODERATE | c.337A>G        | p.Thr113Ala  | 629/1777  | 337/1416  | 113/471   |      |
| XP_015774694. | XM_015919208  | aug_v2a.06220 | #N/D           | #N/D   | 5_prime_UTR_variant  | MODIFIER | c.-470G>C       |              |           |           |           | 470  |
| XP_015766225. | XM_015910739  | aug_v2a.01852 | GO:0005515 GC  | K12035 | missense_variant     | MODERATE | c.497T>A        | p.Leu166Gln  | 1419/2581 | 497/1659  | 166/552   |      |
| #N/D          | XR_001563374. | #N/D          | #N/D           | #N/D   | intron_variant       | MODIFIER | n.930+2361T>C   |              |           |           |           |      |
| XP_015768623. | XM_015913137  | aug_v2a.16918 | GO:0005515 GC  | #N/D   | missense_variant     | MODERATE | c.966T>G        | p.Ser322Arg  | 1718/3386 | 966/2634  | 322/877   |      |
| XP_015770562. | XM_015915076  | aug_v2a.13885 | #N/D           | #N/D   | missense_variant     | MODERATE | c.1006A>G       | p.Asn336Asp  | 1036/8855 | 1006/8361 | 336/2786  |      |
| #N/D          | #N/D          | #N/D          | #N/D           | #N/D   | downstream_gene_vari | MODIFIER | c.*4512A>G      |              |           |           |           | 2263 |
| XP_015775797. | XM_015920311  | aug_v2a.01757 | GO:0003779 GC  | K10457 | missense_variant     | MODERATE | c.768A>C        | p.Lys256Asn  | 802/1894  | 768/1860  | 256/619   |      |
| XP_015779520. | XM_015924034  | aug_v2a.20978 | #N/D           | #N/D   | missense_variant     | MODERATE | c.922A>G        | p.Thr308Ala  | 1140/4631 | 922/2526  | 308/841   |      |

|                            |                |             |        |        |                         |          |              |              |             |             |           |      |
|----------------------------|----------------|-------------|--------|--------|-------------------------|----------|--------------|--------------|-------------|-------------|-----------|------|
| XP_015780155.:XM_015924669 | aug_v2a.07934  | GO:0003824  | GC     | K16608 | missense_variant        | MODERATE | c.1033T>C    | p.Tyr345His  | 1288/5596   | 1033/3066   | 345/1021  |      |
| XP_015780750.:XM_015925264 | aug_v2a.22215  | #N/D        | #N/D   | #N/D   | missense_variant        | MODERATE | c.29T>A      | p.Leu10His   | 87/1643     | 29/396      | 10/131    |      |
| #N/D                       | #N/D           | #N/D        | #N/D   | #N/D   | downstream_gene_vari    | MODIFIER | n.*1629T>G   |              |             |             |           | 1629 |
| XP_015754059.:XM_015898573 | aug_v2a.20102  | GO:0003417  | GC     | K04659 | missense_variant&splic  | MODERATE | c.1921T>A    | p.Cys641Ser  | 1921/3621   | 1921/3606   | 641/1201  |      |
| #N/D                       | #N/D           | #N/D        | #N/D   | #N/D   | non_coding_transcript_  | MODIFIER | n.1000T>G    |              |             |             |           |      |
| #N/D                       | #N/D           | #N/D        | #N/D   | #N/D   | downstream_gene_vari    | MODIFIER | n.*2824T>G   |              |             |             |           | 2824 |
| #N/D                       | #N/D           | #N/D        | #N/D   | #N/D   | downstream_gene_vari    | MODIFIER | c.*7469T>C   |              |             |             |           | 3755 |
| XP_015755542.:XM_015900056 | aug_v2a.10189  | GO:0005604; | G      | K17341 | splice_region_variant&i | LOW      | c.1166-4T>G  |              |             |             |           |      |
| XP_015761884.:XM_015906398 | aug_v2a.11480  | GO:0031410; | G      | K18152 | splice_region_variant&i | LOW      | c.378-4T>C   |              |             |             |           |      |
| #N/D                       | #N/D           | #N/D        | #N/D   | #N/D   | downstream_gene_vari    | MODIFIER | n.*7577A>G   |              |             |             |           | 4926 |
| #N/D                       | XR_001565228.: | #N/D        | #N/D   | #N/D   | splice_region_variant&i | LOW      | n.230T>G     |              |             |             |           |      |
| #N/D                       | #N/D           | #N/D        | #N/D   | #N/D   | downstream_gene_vari    | MODIFIER | c.*2232T>C   |              |             |             |           | 1974 |
| XP_015761332.:XM_015905846 | aug_v2a.05883  | #N/D        | #N/D   | #N/D   | intron_variant          | MODIFIER | c.528+18C>G  |              |             |             |           |      |
| XP_015758578.:XM_015903092 | aug_v2a.11007  | #N/D        | #N/D   | #N/D   | intron_variant          | MODIFIER | c.806-137T>C |              |             |             |           |      |
| XP_015748242.:XM_015892756 | aug_v2a.05207  | GO:0000166  | GC     | K05126 | missense_variant        | MODERATE | c.2613A>G    | p.Ile871Met  | 3084/4530   | 2613/3036   | 871/1011  |      |
| XP_015770883.:XM_015915397 | aug_v2a.07682  | GO:0003677  | K20478 |        | missense_variant        | MODERATE | c.10352A>C   | p.Asn3451Thr | 10362/11892 | 10352/11754 | 3451/3917 |      |
| XP_015758531.:XM_015903045 | aug_v2a.11004  | GO:0004177  | GC     | K01255 | missense_variant        | MODERATE | c.755G>C     | p.Gly252Ala  | 813/1954    | 755/1548    | 252/515   |      |
| XP_015780340.:XM_015924854 | aug_v2a.05409  | GO:0004719  | GC     | K00573 | missense_variant        | MODERATE | c.301T>C     | p.Ser101Pro  | 301/312     | 301/312     | 101/103   |      |
| XP_015754070.:XM_015898584 | aug_v2a.14607  | GO:0005515  | GC     | K06838 | missense_variant        | MODERATE | c.4333C>G    | p.Gln1445Glu | 4426/4986   | 4333/4872   | 1445/1623 |      |
| XP_015767252.:XM_015911766 | aug_v2a.11374  | GO:0016021  | #N/D   | #N/D   | missense_variant        | MODERATE | c.785A>G     | p.Lys262Arg  | 850/1655    | 785/1590    | 262/529   |      |
| XP_015749426.:XM_015893940 | aug_v2a.06213  | #N/D        | #N/D   | #N/D   | missense_variant        | MODERATE | c.649A>G     | p.Met217Val  | 912/4827    | 649/4539    | 217/1512  |      |
| XP_015761884.:XM_015906398 | aug_v2a.11480  | GO:0031410; | G      | K18152 | splice_region_variant&i | LOW      | c.378-4T>C   |              |             |             |           |      |
| XP_015758440.:XM_015902954 | aug_v2a.24500  | GO:0000166  | GC     | K15456 | synonymous_variant      | LOW      | c.48A>G      | p.Lys16Lys   | 136/1214    | 48/546      | 16/181    |      |
| XP_015770867.:XM_015915381 | aug_v2a.02871  | GO:0000187  | GC     | #N/D   | synonymous_variant      | LOW      | c.2098A>G    | p.Ala700Ala  | 3564/5699   | 2098/3549   | 700/1182  |      |
| #N/D                       | #N/D           | #N/D        | #N/D   | #N/D   | intergenic_region       | MODIFIER | n.1323058A>G |              |             |             |           |      |
| #N/D                       | #N/D           | #N/D        | #N/D   | #N/D   | intergenic_region       | MODIFIER | n.219233A>C  |              |             |             |           |      |
| #N/D                       | #N/D           | #N/D        | #N/D   | #N/D   | intergenic_region       | MODIFIER | n.530855C>G  |              |             |             |           |      |
| XP_015754975.:XM_015899489 | aug_v2a.19073  | GO:0003824  | GC     | K10147 | synonymous_variant      | LOW      | c.1044T>C    | p.Ser348Ser  | 1164/1842   | 1044/1215   | 348/404   |      |
| XP_015768541.:XM_015913055 | aug_v2a.10224  | GO:0003824  | GC     | #N/D   | synonymous_variant      | LOW      | c.285A>G     | p.Glu95Glu   | 321/1050    | 285/999     | 95/332    |      |
| XP_015777776.:XM_015922290 | aug_v2a.03038  | GO:0004197  | GC     | K11840 | synonymous_variant      | LOW      | c.2580T>C    | p.Ala860Ala  | 2893/8599   | 2580/6969   | 860/2322  |      |
| XP_015763165.:XM_015907679 | aug_v2a.06182  | GO:0004842  | GC     | K10595 | synonymous_variant      | LOW      | c.5097A>G    | p.Arg1699Arg | 5232/11573  | 5097/11187  | 1699/3728 |      |
| XP_015756276.:XM_015900790 | aug_v2a.00421  | GO:0004871  | GC     | K16506 | synonymous_variant      | LOW      | c.5286A>G    | p.Val1762Val | 5533/7717   | 5286/7470   | 1762/2489 |      |

|                            |               |               |           |                    |          |              |              |            |            |           |
|----------------------------|---------------|---------------|-----------|--------------------|----------|--------------|--------------|------------|------------|-----------|
| XP_015773509.:XM_015918023 | aug_v2a.23754 | GO:0004888    | GC K08465 | synonymous_variant | LOW      | c.381T>C     | p.Ile127Ile  | 381/1911   | 381/1323   | 127/440   |
| XP_015773375.:XM_015917889 | aug_v2a.07476 | GO:0005215    | GC K12391 | synonymous_variant | LOW      | c.462A>G     | p.Arg154Arg  | 491/2757   | 462/2358   | 154/785   |
| XP_015765276.:XM_015909790 | aug_v2a.06108 | GO:0005215    | GC #N/D   | synonymous_variant | LOW      | c.585T>C     | p.Ser195Ser  | 734/2005   | 585/1557   | 195/518   |
| XP_015765276.:XM_015909790 | aug_v2a.06108 | GO:0005215    | GC #N/D   | synonymous_variant | LOW      | c.165A>G     | p.Val55Val   | 255/1940   | 165/1551   | 55/516    |
| XP_015754993.:XM_015899507 | aug_v2a.10966 | GO:0005215    | GC K14638 | synonymous_variant | LOW      | c.246A>G     | p.Leu82Leu   | 1116/2811  | 246/1554   | 82/517    |
| XP_015754993.:XM_015899507 | aug_v2a.10966 | GO:0005215    | GC K14638 | synonymous_variant | LOW      | c.867T>C     | p.Ser289Ser  | 1737/2811  | 867/1554   | 289/517   |
| XP_015749068.:XM_015893582 | aug_v2a.17185 | GO:0005778; G | GC K13338 | synonymous_variant | LOW      | c.671T>G     | p.Ser224Ser  | 791/2512   | 671/2307   | 224/768   |
| XP_015751474.:XM_015895988 | #N/D          | #N/D          | #N/D      | synonymous_variant | LOW      | c.471G>C     | p.Ser157Ser  | 525/2338   | 471/1209   | 157/402   |
| XP_015751698.:XM_015896212 | aug_v2a.01037 | GO:0003993    | GC K14379 | synonymous_variant | LOW      | c.1002A>G    | p.Ser334Ser  | 1139/1285  | 1002/1008  | 334/335   |
| XP_015760757.:XM_015905271 | aug_v2a.24586 | GO:0005488    | GC #N/D   | synonymous_variant | LOW      | c.147C>G     | p.Leu49Leu   | 481/10573  | 147/9609   | 49/3202   |
| XP_015752405.:XM_015896919 | aug_v2a.15260 | GO:0000077    | GC K04728 | synonymous_variant | LOW      | c.4469C>G    | p.Gly1490Gly | 4604/10358 | 4469/10173 | 1490/3390 |
| XP_015752454.:XM_015896968 | aug_v2a.14945 | GO:0005509    | GC #N/D   | synonymous_variant | LOW      | c.297A>G     | p.Lys99Lys   | 446/2065   | 297/966    | 99/321    |
| XP_015752845.:XM_015897359 | aug_v2a.08393 | GO:0005102    | GC K06252 | synonymous_variant | LOW      | c.7487G>C    | p.Ala2496Ala | 7812/16621 | 7487/16296 | 2496/5431 |
| XP_015752845.:XM_015897359 | aug_v2a.08393 | GO:0005102    | GC K06252 | synonymous_variant | LOW      | c.3276A>G    | p.Lys1092Lys | 3601/16621 | 3276/16296 | 1092/5431 |
| XP_015748949.:XM_015893463 | aug_v2a.19052 | #N/D          | #N/D      | intron_variant     | MODIFIER | c.306+113T>C |              |            |            |           |
| XP_015753209.:XM_015897723 | aug_v2a.04432 | GO:0003677    | GC K09309 | synonymous_variant | LOW      | c.528T>A     | p.Val176Val  | 794/1521   | 528/708    | 176/235   |
| XP_015753231.:XM_015897745 | aug_v2a.24050 | GO:0006810    | GC K14713 | synonymous_variant | LOW      | c.540A>G     | p.Glu180Glu  | 598/1320   | 540/1167   | 180/388   |
| XP_015753552.:XM_015898066 | #N/D          | #N/D          | K04255    | synonymous_variant | LOW      | c.893T>G     | p.Cys298Cys  | 893/996    | 893/996    | 298/331   |
| XP_015753634.:XM_015898148 | aug_v2a.04793 | GO:0005215    | GC K13856 | synonymous_variant | LOW      | c.699T>C     | p.Ser233Ser  | 2559/5740  | 699/3057   | 233/1018  |
| XP_015753887.:XM_015898401 | aug_v2a.06186 | GO:0004091    | GC K12417 | synonymous_variant | LOW      | c.124T>G     | p.Ala42Ala   | 865/2578   | 124/1656   | 42/551    |
| XP_015753889.:XM_015898403 | aug_v2a.16663 | #N/D          | #N/D      | synonymous_variant | LOW      | c.508A>G     | p.Glu170Glu  | 526/2789   | 508/1443   | 170/480   |
| XP_015754058.:XM_015898572 | aug_v2a.15791 | GO:0005576    | GC K13110 | synonymous_variant | LOW      | c.822A>G     | p.Thr274Thr  | 924/1715   | 822/1062   | 274/353   |
| XP_015752949.:XM_015897463 | aug_v2a.21812 | GO:0005488    | GC #N/D   | synonymous_variant | LOW      | c.567A>G     | p.Ala189Ala  | 637/2554   | 567/1683   | 189/560   |
| XP_015754310.:XM_015898824 | aug_v2a.12941 | GO:0000036    | GC K12442 | synonymous_variant | LOW      | c.7831A>G    | p.Val2611Val | 8481/12017 | 7831/10746 | 2611/3581 |
| XP_015754672.:XM_015899186 | aug_v2a.06739 | GO:0003774    | GC #N/D   | synonymous_variant | LOW      | c.2473T>C    | p.Arg825Arg  | 3121/4596  | 2473/3336  | 825/1111  |
| XP_015754739.:XM_015899253 | aug_v2a.04852 | GO:0005515    | GC #N/D   | synonymous_variant | LOW      | c.597A>C     | p.Val199Val  | 890/1073   | 597/765    | 199/254   |
| XP_015756278.:XM_015900792 | aug_v2a.19517 | GO:0005509    | GC K16506 | synonymous_variant | LOW      | c.5117A>T    | p.Val1706Val | 5211/18466 | 5117/18372 | 1706/6123 |
| XP_015755639.:XM_015900153 | aug_v2a.12414 | GO:0005515    | GC K14554 | synonymous_variant | LOW      | c.1768A>G    | p.Val590Val  | 1796/3533  | 1768/2568  | 590/855   |
| XP_015755682.:XM_015900196 | aug_v2a.18180 | GO:0003674    | GC #N/D   | synonymous_variant | LOW      | c.127A>G     | p.Asp43Asp   | 311/1749   | 127/1491   | 43/496    |
| XP_015756581.:XM_015901095 | #N/D          | #N/D          | #N/D      | synonymous_variant | LOW      | c.18C>G      | p.Arg6Arg    | 116/1291   | 18/669     | 6/222     |
| XP_015771047.:XM_015915561 | aug_v2a.14067 | #N/D          | #N/D      | intron_variant     | MODIFIER | c.196-46C>G  |              |            |            |           |
| XP_015757439.:XM_015901953 | aug_v2a.06864 | GO:0016020    | GC #N/D   | synonymous_variant | LOW      | c.1280A>T    | p.Phe427Phe  | 1565/2595  | 1280/1473  | 427/490   |

|                            |               |             |           |                    |          |              |              |            |            |           |
|----------------------------|---------------|-------------|-----------|--------------------|----------|--------------|--------------|------------|------------|-----------|
| XP_015773395.:XM_015917909 | aug_v2a.12812 | #N/D        | #N/D      | intron_variant     | MODIFIER | c.2456+97C>G |              |            |            |           |
| XP_015754070.:XM_015898584 | aug_v2a.14607 | GO:0005515  | GC K06838 | synonymous_variant | LOW      | c.1743T>C    | p.Phe581Phe  | 1836/4986  | 1743/4872  | 581/1623  |
| XP_015757653.:XM_015902167 | aug_v2a.00176 | GO:0099078; | G( K04232 | synonymous_variant | LOW      | c.228A>C     | p.Gly76Gly   | 228/1777   | 228/1077   | 76/358    |
| XP_015758092.:XM_015902606 | aug_v2a.11337 | GO:0005488  | GC K11824 | synonymous_variant | LOW      | c.30T>C      | p.Arg10Arg   | 304/2424   | 30/2150    | 10/715    |
| XP_015758138.:XM_015902652 | aug_v2a.23780 | #N/D        | #N/D      | synonymous_variant | LOW      | c.4631T>G    | p.Arg1544Arg | 4721/7706  | 4631/6882  | 1544/2293 |
| XP_015758374.:XM_015902888 | aug_v2a.12636 | GO:0005509  | GC K17095 | synonymous_variant | LOW      | c.721A>G     | p.Gly241Gly  | 1420/3051  | 721/978    | 241/325   |
| XP_015758599.:XM_015903113 | aug_v2a.22017 | GO:0000166  | GC K17915 | synonymous_variant | LOW      | c.177T>C     | p.Cys59Cys   | 216/1193   | 177/1128   | 59/375    |
| XP_015769665.:XM_015914179 | aug_v2a.10497 | GO:0005515  | GC K12604 | synonymous_variant | LOW      | c.3894T>C    | p.Asn1298Asr | 4087/7702  | 3894/7332  | 1298/2443 |
| XP_015761711.:XM_015906225 | aug_v2a.01492 | GO:0005634  | GC #N/D   | synonymous_variant | LOW      | c.288T>C     | p.Tyr96Tyr   | 412/912    | 288/348    | 96/115    |
| XP_015758626.:XM_015903140 | aug_v2a.09757 | GO:0000166  | GC K12812 | synonymous_variant | LOW      | c.312T>C     | p.Thr104Thr  | 440/1625   | 312/1290   | 104/429   |
| XP_015759029.:XM_015903543 | aug_v2a.12924 | GO:0016021; | G( #N/D   | synonymous_variant | LOW      | c.2334T>C    | p.Val778Val  | 2445/4432  | 2334/3777  | 778/1258  |
| XP_015759989.:XM_015904503 | aug_v2a.02347 | GO:0045179; | G( #N/D   | synonymous_variant | LOW      | c.621A>G     | p.Gly207Gly  | 756/1642   | 621/1128   | 207/375   |
| XP_015760867.:XM_015905381 | aug_v2a.23959 | GO:0003674  | GC K06768 | synonymous_variant | LOW      | c.206A>G     | p.Trp69Trp   | 207/2241   | 206/1836   | 69/611    |
| XP_015760869.:XM_015905383 | aug_v2a.22167 | GO:0003676; | G( #N/D   | synonymous_variant | LOW      | c.549G>C     | p.Ser183Ser  | 880/7192   | 549/6177   | 183/2058  |
| XP_015761441.:XM_015905955 | aug_v2a.15867 | GO:0000166  | GC K03979 | synonymous_variant | LOW      | c.1857T>G    | p.Leu619Leu  | 1894/2563  | 1857/2028  | 619/675   |
| XP_015761517.:XM_015906031 | #N/D          | #N/D        | #N/D      | synonymous_variant | LOW      | c.1065T>C    | p.Ile355Ile  | 1096/1974  | 1065/1446  | 355/481   |
| XP_015761517.:XM_015906031 | #N/D          | #N/D        | #N/D      | synonymous_variant | LOW      | c.462C>G     | p.Thr154Thr  | 493/1974   | 462/1446   | 154/481   |
| XP_015761517.:XM_015906031 | #N/D          | #N/D        | #N/D      | synonymous_variant | LOW      | c.1212T>C    | p.Ser404Ser  | 1243/1974  | 1212/1446  | 404/481   |
| XP_015761961.:XM_015906475 | #N/D          | #N/D        | K01131    | synonymous_variant | LOW      | c.252T>G     | p.Leu84Leu   | 258/1956   | 252/1557   | 84/518    |
| XP_015762163.:XM_015906677 | aug_v2a.18390 | GO:0000287  | GC K03515 | synonymous_variant | LOW      | c.810A>C     | p.Asn270Asn  | 882/3144   | 810/3057   | 270/1018  |
| XP_015762577.:XM_015907091 | aug_v2a.07128 | GO:0005634; | G( K12605 | synonymous_variant | LOW      | c.222T>C     | p.Pro74Pro   | 222/795    | 222/681    | 74/226    |
| XP_015762265.:XM_015906779 | aug_v2a.05040 | GO:0005083  | GC K20223 | synonymous_variant | LOW      | c.1475T>C    | p.Pro492Pro  | 1605/3633  | 1475/3021  | 492/1006  |
| XP_015762278.:XM_015906792 | aug_v2a.09010 | #N/D        | K20478    | synonymous_variant | LOW      | c.5062T>C    | p.Leu1688Leu | 6049/11900 | 5062/10374 | 1688/3457 |
| XP_015764002.:XM_015908516 | aug_v2a.09304 | GO:0004871  | GC K02842 | synonymous_variant | LOW      | c.162T>C     | p.Pro54Pro   | 1929/4871  | 162/1956   | 54/651    |
| XP_015764677.:XM_015909191 | aug_v2a.09255 | #N/D        | #N/D      | synonymous_variant | LOW      | c.534T>C     | p.Ser178Ser  | 534/980    | 534/651    | 178/216   |
| XP_015764921.:XM_015909435 | aug_v2a.17161 | GO:0003824  | GC K01192 | synonymous_variant | LOW      | c.541T>C     | p.Arg181Arg  | 578/2297   | 541/2187   | 181/728   |
| XP_015765242.:XM_015909756 | #N/D          | #N/D        | #N/D      | missense_variant   | MODERATE | c.437C>G     | p.Ser146Trp  | 669/1487   | 437/717    | 146/238   |
| XP_015764940.:XM_015909454 | aug_v2a.05493 | GO:0003723  | #N/D      | synonymous_variant | LOW      | c.573T>C     | p.Leu191Leu  | 1383/2467  | 573/1248   | 191/415   |
| XP_015764975.:XM_015909489 | aug_v2a.05494 | GO:0000166  | GC K14947 | synonymous_variant | LOW      | c.1749A>G    | p.Lys583Lys  | 1771/2499  | 1749/2097  | 583/698   |
| XP_015766287.:XM_015910801 | aug_v2a.01851 | GO:0005515  | GC #N/D   | synonymous_variant | LOW      | c.2025T>C    | p.Cys675Cys  | 3272/4257  | 2025/2268  | 675/755   |
| XP_015765170.:XM_015909684 | aug_v2a.08778 | GO:0016021; | G( K23088 | synonymous_variant | LOW      | c.916T>A     | p.Ile306Ile  | 931/2154   | 916/1812   | 306/603   |
| XP_015766287.:XM_015910801 | aug_v2a.01851 | GO:0005515  | GC #N/D   | synonymous_variant | LOW      | c.507A>G     | p.Glu169Glu  | 1754/4257  | 507/2268   | 169/755   |
| XP_015766297.:XM_015910811 | aug_v2a.23025 | #N/D        | #N/D      | synonymous_variant | LOW      | c.2792T>C    | p.Ser931Ser  | 2837/3510  | 2792/3465  | 931/1154  |
| XP_015766507.:XM_015911021 | aug_v2a.00758 | GO:0005216  | GC K04988 | synonymous_variant | LOW      | c.4314T>C    | p.His1438His | 4442/8365  | 4314/7974  | 1438/2657 |

|                            |               |             |           |                    |     |           |              |            |           |           |
|----------------------------|---------------|-------------|-----------|--------------------|-----|-----------|--------------|------------|-----------|-----------|
| XP_015766857.:XM_015911371 | aug_v2a.11511 | GO:0016021  | #N/D      | synonymous_variant | LOW | c.973C>G  | p.Val325Val  | 1195/2067  | 973/1176  | 325/391   |
| XP_015767853.:XM_015912367 | aug_v2a.21960 | GO:0000166  | GC K07209 | synonymous_variant | LOW | c.48A>G   | p.Lys16Lys   | 48/887     | 48/801    | 16/266    |
| XP_015768229.:XM_015912743 | aug_v2a.20021 | GO:0001843  | GC K07207 | synonymous_variant | LOW | c.3549T>C | p.Ser1183Ser | 3639/4512  | 3549/4251 | 1183/1416 |
| XP_015768430.:XM_015912944 | aug_v2a.21854 | GO:0000723  | GC K11109 | synonymous_variant | LOW | c.298T>C  | p.Arg100Arg  | 346/2781   | 298/2442  | 100/813   |
| XP_015768478.:XM_015912992 | #N/D          | #N/D        | #N/D      | synonymous_variant | LOW | c.427T>C  | p.His143His  | 897/996    | 427/459   | 143/152   |
| XP_015768595.:XM_015913109 | aug_v2a.22790 | #N/D        | K04377    | synonymous_variant | LOW | c.120T>C  | p.Leu40Leu   | 2257/4005  | 120/1050  | 40/349    |
| XP_015768650.:XM_015913164 | #N/D          | #N/D        | #N/D      | synonymous_variant | LOW | c.926T>C  | p.Ala309Ala  | 1358/3133  | 926/2523  | 309/840   |
| XP_015768940.:XM_015913454 | aug_v2a.10187 | GO:0004867  | GC K06238 | synonymous_variant | LOW | c.1547T>C | p.Ala516Ala  | 2733/5701  | 1547/4515 | 516/1504  |
| XP_015769616.:XM_015914130 | aug_v2a.01755 | GO:0005634; | GC K11093 | synonymous_variant | LOW | c.927A>G  | p.Arg309Arg  | 1063/1962  | 927/1095  | 309/364   |
| XP_015769652.:XM_015914166 | aug_v2a.10630 | GO:0005085  | GC #N/D   | synonymous_variant | LOW | c.1024A>C | p.His342His  | 1947/4888  | 1024/3408 | 342/1135  |
| XP_015769668.:XM_015914182 | aug_v2a.17148 | GO:0003824  | GC K00815 | synonymous_variant | LOW | c.825A>T  | p.Ser275Ser  | 1999/2327  | 825/1128  | 275/375   |
| XP_015770244.:XM_015914758 | aug_v2a.02318 | GO:0000724  | GC K10484 | synonymous_variant | LOW | c.508A>G  | p.Val170Val  | 624/821    | 508/705   | 170/234   |
| XP_015770272.:XM_015914786 | aug_v2a.02321 | GO:0001906  | GC K15720 | synonymous_variant | LOW | c.1141T>C | p.Arg381Arg  | 1906/4456  | 1141/3240 | 381/1079  |
| XP_015748829.:XM_015893343 | #N/D          | #N/D        | #N/D      | synonymous_variant | LOW | c.1249T>C | p.Pro417Pro  | 2273/3721  | 1249/2697 | 417/898   |
| XP_015770557.:XM_015915071 | aug_v2a.19400 | GO:0008168  | #N/D      | synonymous_variant | LOW | c.251T>C  | p.Ala84Ala   | 478/1038   | 251/606   | 84/201    |
| XP_015770563.:XM_015915077 | aug_v2a.13885 | #N/D        | #N/D      | synonymous_variant | LOW | c.2959T>G | p.Val987Val  | 2989/8855  | 2959/8361 | 987/2786  |
| XP_015770578.:XM_015915092 | aug_v2a.19402 | GO:0000166  | GC #N/D   | synonymous_variant | LOW | c.198T>C  | p.Tyr66Tyr   | 543/1139   | 198/564   | 66/187    |
| XP_015770789.:XM_015915303 | #N/D          | #N/D        | K08187    | synonymous_variant | LOW | c.876T>C  | p.Ser292Ser  | 904/1114   | 876/1086  | 292/361   |
| XP_015771532.:XM_015916046 | aug_v2a.11297 | GO:0001701  | GC K23404 | synonymous_variant | LOW | c.1531T>C | p.Pro511Pro  | 1563/1805  | 1531/1713 | 511/570   |
| XP_015757315.:XM_015901829 | aug_v2a.05536 | #N/D        | K20478    | synonymous_variant | LOW | c.936A>T  | p.Ile312Ile  | 1605/17880 | 936/17211 | 312/5736  |
| XP_015765285.:XM_015909799 | aug_v2a.06106 | #N/D        | K08202    | synonymous_variant | LOW | c.28C>G   | p.Glu10Glu   | 188/1483   | 28/1308   | 10/435    |
| XP_015771657.:XM_015916171 | aug_v2a.07386 | GO:0003824  | GC #N/D   | synonymous_variant | LOW | c.184T>C  | p.Pro62Pro   | 234/563    | 184/432   | 62/143    |
| XP_015771962.:XM_015916476 | aug_v2a.11999 | GO:0004872  | GC #N/D   | synonymous_variant | LOW | c.1098A>C | p.Ser366Ser  | 1123/1935  | 1098/1563 | 366/520   |
| XP_015771990.:XM_015916504 | aug_v2a.18502 | GO:0004720  | GC K00280 | synonymous_variant | LOW | c.135A>C  | p.Gly45Gly   | 569/2533   | 135/1209  | 45/402    |
| XP_015772024.:XM_015916538 | #N/D          | #N/D        | K08375    | synonymous_variant | LOW | c.491T>C  | p.Ser164Ser  | 741/1599   | 491/1068  | 164/355   |
| XP_015773220.:XM_015917734 | aug_v2a.11490 | #N/D        | K20283    | synonymous_variant | LOW | c.3318T>C | p.His1106His | 3359/5556  | 3318/5124 | 1106/1707 |
| XP_015773220.:XM_015917734 | aug_v2a.11490 | #N/D        | K20283    | synonymous_variant | LOW | c.985C>G  | p.Glu329Glu  | 1026/5556  | 985/5124  | 329/1707  |
| XP_015773372.:XM_015917886 | aug_v2a.12816 | GO:0000166  | GC K22399 | synonymous_variant | LOW | c.879T>A  | p.Leu293Leu  | 1014/1460  | 879/1086  | 293/361   |
| XP_015773913.:XM_015918427 | aug_v2a.13253 | GO:0005515  | GC #N/D   | synonymous_variant | LOW | c.759A>T  | p.Val253Val  | 1014/2471  | 759/1005  | 253/334   |
| XP_015773967.:XM_015918481 | aug_v2a.14638 | GO:0003824  | GC #N/D   | synonymous_variant | LOW | c.720A>G  | p.Ser240Ser  | 1198/2080  | 720/984   | 240/327   |
| XP_015774405.:XM_015918919 | aug_v2a.01565 | #N/D        | K04203    | synonymous_variant | LOW | c.687T>C  | p.Leu229Leu  | 2363/3442  | 687/1065  | 229/354   |
| XP_015775132.:XM_015919646 | aug_v2a.07618 | GO:0000166  | GC K01869 | synonymous_variant | LOW | c.2970T>C | p.His990His  | 3119/3257  | 2970/3093 | 990/1030  |
| XP_015775431.:XM_015919945 | aug_v2a.15020 | GO:0005829; | GC #N/D   | synonymous_variant | LOW | c.1498C>G | p.Glu500Glu  | 1539/2180  | 1498/2139 | 500/712   |

|              |               |               |            |           |                       |          |             |             |           |           |          |
|--------------|---------------|---------------|------------|-----------|-----------------------|----------|-------------|-------------|-----------|-----------|----------|
| XP_015775636 | :XM_015920150 | #N/D          | #N/D       | K05052    | synonymous_variant    | LOW      | c.306T>C    | p.Tyr102Tyr | 313/1134  | 306/960   | 102/319  |
| XP_015765242 | :XM_015909756 | #N/D          | #N/D       | #N/D      | synonymous_variant    | LOW      | c.598C>G    | p.Glu200Glu | 830/1487  | 598/717   | 200/238  |
| XP_015775797 | :XM_015920311 | aug_v2a.01757 | GO:0003779 | GC K10457 | synonymous_variant    | LOW      | c.1200T>C   | p.Ile400Ile | 1510/3391 | 1200/1902 | 400/633  |
| XP_015776469 | :XM_015920983 | aug_v2a.00797 | GO:0006810 | GC K15381 | synonymous_variant    | LOW      | c.973T>G    | p.Gly325Gly | 1205/1699 | 973/1416  | 325/471  |
| XP_015778630 | :XM_015923144 | aug_v2a.00310 | #N/D       | #N/D      | synonymous_variant    | LOW      | c.936A>G    | p.Gln312Gln | 1163/1615 | 936/966   | 312/321  |
| XP_015778668 | :XM_015923182 | aug_v2a.22849 | GO:0005829 | GC K12611 | synonymous_variant    | LOW      | c.132A>G    | p.Ala44Ala  | 164/1244  | 132/1197  | 44/398   |
| XP_015779068 | :XM_015923582 | aug_v2a.03194 | GO:0005886 | GC K03327 | synonymous_variant    | LOW      | c.393A>G    | p.Arg131Arg | 556/2519  | 393/1947  | 131/648  |
| XP_015779439 | :XM_015923953 | aug_v2a.00960 | GO:0001714 | GC K08036 | synonymous_variant    | LOW      | c.151A>G    | p.Ala51Ala  | 525/2662  | 151/1596  | 51/531   |
| XP_015779624 | :XM_015924138 | aug_v2a.07299 | GO:0016020 | GC #N/D   | synonymous_variant    | LOW      | c.495T>C    | p.Gly165Gly | 1269/2414 | 495/1089  | 165/362  |
| XP_015779647 | :XM_015924161 | aug_v2a.05585 | GO:0000070 | GC K06636 | synonymous_variant    | LOW      | c.384G>C    | p.Val128Val | 510/1738  | 384/1053  | 128/350  |
| XP_015779873 | :XM_015924387 | aug_v2a.13949 | GO:0000077 | GC K10867 | synonymous_variant    | LOW      | c.1710A>G   | p.Pro570Pro | 1755/2815 | 1710/2589 | 570/862  |
| XP_015780138 | :XM_015924652 | aug_v2a.12430 | GO:0000049 | GC K14288 | synonymous_variant    | LOW      | c.81A>G     | p.Glu27Glu  | 360/3972  | 81/2604   | 27/867   |
| XP_015780581 | :XM_015925095 | aug_v2a.00700 | GO:0001614 | GC K05218 | synonymous_variant    | LOW      | c.771T>G    | p.Met257Met | 837/2979  | 771/2130  | 257/709  |
| XP_015765286 | :XM_015909800 | aug_v2a.06106 | #N/D       | K08202    | synonymous_variant    | LOW      | c.1032T>C   | p.Pro344Pro | 1192/1483 | 1032/1308 | 344/435  |
| XP_015773220 | :XM_015917734 | aug_v2a.11490 | #N/D       | K20283    | synonymous_variant    | LOW      | c.1806A>G   | p.Glu602Glu | 1847/5556 | 1806/5124 | 602/1707 |
| XP_015780739 | :XM_015925253 | aug_v2a.10428 | #N/D       | #N/D      | synonymous_variant    | LOW      | c.630T>C    | p.Val210Val | 661/1603  | 630/1509  | 210/502  |
| #N/D         | #N/D          | #N/D          | #N/D       | #N/D      | upstream_gene_variant | MODIFIER | c.-6053A>G  |             |           |           | 24       |
| #N/D         | #N/D          | #N/D          | #N/D       | #N/D      | upstream_gene_variant | MODIFIER | n.-1755A>G  |             |           |           | 1755     |
| #N/D         | #N/D          | #N/D          | #N/D       | #N/D      | upstream_gene_variant | MODIFIER | c.-356T>A   |             |           |           | 190      |
| #N/D         | #N/D          | #N/D          | #N/D       | #N/D      | upstream_gene_variant | MODIFIER | n.-4490T>C  |             |           |           | 4490     |
| #N/D         | #N/D          | #N/D          | #N/D       | #N/D      | upstream_gene_variant | MODIFIER | n.-966A>G   |             |           |           | 966      |
| #N/D         | #N/D          | #N/D          | #N/D       | #N/D      | upstream_gene_variant | MODIFIER | c.-5086G>C  |             |           |           | 4986     |
| #N/D         | #N/D          | #N/D          | #N/D       | #N/D      | upstream_gene_variant | MODIFIER | c.-3607G>C  |             |           |           | 3607     |
| #N/D         | #N/D          | #N/D          | #N/D       | #N/D      | upstream_gene_variant | MODIFIER | c.-1316A>G  |             |           |           | 1036     |
| #N/D         | #N/D          | #N/D          | #N/D       | #N/D      | upstream_gene_variant | MODIFIER | c.-6115A>T  |             |           |           | 2857     |
| #N/D         | #N/D          | #N/D          | #N/D       | #N/D      | upstream_gene_variant | MODIFIER | n.-2332A>G  |             |           |           | 2332     |
| #N/D         | #N/D          | #N/D          | #N/D       | #N/D      | upstream_gene_variant | MODIFIER | c.-6231T>C  |             |           |           | 4071     |
| #N/D         | #N/D          | #N/D          | #N/D       | #N/D      | upstream_gene_variant | MODIFIER | c.-2431C>G  |             |           |           | 505      |
| #N/D         | #N/D          | #N/D          | #N/D       | #N/D      | upstream_gene_variant | MODIFIER | c.-42958A>T |             |           |           | 2273     |
| #N/D         | #N/D          | #N/D          | #N/D       | #N/D      | upstream_gene_variant | MODIFIER | c.-548T>C   |             |           |           | 331      |
| #N/D         | #N/D          | #N/D          | #N/D       | #N/D      | upstream_gene_variant | MODIFIER | c.-1608A>C  |             |           |           | 985      |
| #N/D         | #N/D          | #N/D          | #N/D       | #N/D      | upstream_gene_variant | MODIFIER | c.-18019A>T |             |           |           | 4978     |
| #N/D         | #N/D          | #N/D          | #N/D       | #N/D      | upstream_gene_variant | MODIFIER | n.-1310A>C  |             |           |           | 1310     |
| #N/D         | #N/D          | #N/D          | #N/D       | #N/D      | upstream_gene_variant | MODIFIER | c.-3850A>G  |             |           |           | 888      |

|      |      |      |      |      |                                |             |      |
|------|------|------|------|------|--------------------------------|-------------|------|
| #N/D | #N/D | #N/D | #N/D | #N/D | upstream_gene_variant MODIFIER | n.-1812T>A  | 1812 |
| #N/D | #N/D | #N/D | #N/D | #N/D | upstream_gene_variant MODIFIER | c.-3108T>C  | 3012 |
| #N/D | #N/D | #N/D | #N/D | #N/D | upstream_gene_variant MODIFIER | n.-3291T>C  | 3291 |
| #N/D | #N/D | #N/D | #N/D | #N/D | upstream_gene_variant MODIFIER | c.-3885T>C  | 3804 |
| #N/D | #N/D | #N/D | #N/D | #N/D | upstream_gene_variant MODIFIER | c.-7665A>C  | 3880 |
| #N/D | #N/D | #N/D | #N/D | #N/D | upstream_gene_variant MODIFIER | c.-4767A>G  | 4655 |
| #N/D | #N/D | #N/D | #N/D | #N/D | upstream_gene_variant MODIFIER | c.-17554A>T | 2111 |
| #N/D | #N/D | #N/D | #N/D | #N/D | upstream_gene_variant MODIFIER | c.-14493T>C | 3316 |
| #N/D | #N/D | #N/D | #N/D | #N/D | upstream_gene_variant MODIFIER | c.-12619A>C | 729  |
| #N/D | #N/D | #N/D | #N/D | #N/D | upstream_gene_variant MODIFIER | c.-16623T>C | 3223 |
| #N/D | #N/D | #N/D | #N/D | #N/D | upstream_gene_variant MODIFIER | n.-710T>C   | 710  |
| #N/D | #N/D | #N/D | #N/D | #N/D | upstream_gene_variant MODIFIER | c.-1951T>C  | 1916 |
| #N/D | #N/D | #N/D | #N/D | #N/D | upstream_gene_variant MODIFIER | c.-894A>G   | 894  |
| #N/D | #N/D | #N/D | #N/D | #N/D | upstream_gene_variant MODIFIER | c.-6939A>T  | 249  |
| #N/D | #N/D | #N/D | #N/D | #N/D | upstream_gene_variant MODIFIER | c.-2656T>C  | 2448 |
| #N/D | #N/D | #N/D | #N/D | #N/D | upstream_gene_variant MODIFIER | c.-4850A>C  | 4651 |
| #N/D | #N/D | #N/D | #N/D | #N/D | upstream_gene_variant MODIFIER | c.-4384A>C  | 4308 |
| #N/D | #N/D | #N/D | #N/D | #N/D | upstream_gene_variant MODIFIER | c.-5295T>C  | 3033 |
| #N/D | #N/D | #N/D | #N/D | #N/D | upstream_gene_variant MODIFIER | c.-1751T>C  | 1686 |
| #N/D | #N/D | #N/D | #N/D | #N/D | upstream_gene_variant MODIFIER | c.-3458A>G  | 2998 |
| #N/D | #N/D | #N/D | #N/D | #N/D | upstream_gene_variant MODIFIER | c.-9093A>G  | 357  |
| #N/D | #N/D | #N/D | #N/D | #N/D | upstream_gene_variant MODIFIER | c.-5648A>G  | 4988 |
| #N/D | #N/D | #N/D | #N/D | #N/D | upstream_gene_variant MODIFIER | c.-5126T>G  | 4525 |
| #N/D | #N/D | #N/D | #N/D | #N/D | upstream_gene_variant MODIFIER | c.-8640C>G  | 2652 |
| #N/D | #N/D | #N/D | #N/D | #N/D | upstream_gene_variant MODIFIER | c.-15002A>G | 3810 |
| #N/D | #N/D | #N/D | #N/D | #N/D | upstream_gene_variant MODIFIER | c.-4009C>G  | 3979 |
| #N/D | #N/D | #N/D | #N/D | #N/D | upstream_gene_variant MODIFIER | c.-82A>G    | 41   |
| #N/D | #N/D | #N/D | #N/D | #N/D | upstream_gene_variant MODIFIER | c.-8184T>C  | 4644 |
| #N/D | #N/D | #N/D | #N/D | #N/D | upstream_gene_variant MODIFIER | c.-993G>C   | 981  |
| #N/D | #N/D | #N/D | #N/D | #N/D | upstream_gene_variant MODIFIER | c.-1267A>G  | 1056 |
| #N/D | #N/D | #N/D | #N/D | #N/D | upstream_gene_variant MODIFIER | n.-3151T>G  | 3151 |
| #N/D | #N/D | #N/D | #N/D | #N/D | upstream_gene_variant MODIFIER | c.-6678A>T  | 4070 |
| #N/D | #N/D | #N/D | #N/D | #N/D | upstream_gene_variant MODIFIER | n.-860A>G   | 860  |
| #N/D | #N/D | #N/D | #N/D | #N/D | upstream_gene_variant MODIFIER | c.-1309A>G  | 1298 |
| #N/D | #N/D | #N/D | #N/D | #N/D | upstream_gene_variant MODIFIER | c.-11963A>G | 1603 |
| #N/D | #N/D | #N/D | #N/D | #N/D | upstream_gene_variant MODIFIER | c.-11103T>C | 4568 |

|      |      |      |      |      |                                |             |      |
|------|------|------|------|------|--------------------------------|-------------|------|
| #N/D | #N/D | #N/D | #N/D | #N/D | upstream_gene_variant MODIFIER | c.-4209T>G  | 2443 |
| #N/D | #N/D | #N/D | #N/D | #N/D | upstream_gene_variant MODIFIER | c.-19696T>C | 3161 |
| #N/D | #N/D | #N/D | #N/D | #N/D | upstream_gene_variant MODIFIER | c.-9234T>C  | 4582 |
| #N/D | #N/D | #N/D | #N/D | #N/D | upstream_gene_variant MODIFIER | c.-1003A>C  | 1003 |
| #N/D | #N/D | #N/D | #N/D | #N/D | upstream_gene_variant MODIFIER | c.-6240A>G  | 4572 |
| #N/D | #N/D | #N/D | #N/D | #N/D | upstream_gene_variant MODIFIER | c.-74557A>C | 190  |
| #N/D | #N/D | #N/D | #N/D | #N/D | upstream_gene_variant MODIFIER | c.-13190T>C | 1622 |
| #N/D | #N/D | #N/D | #N/D | #N/D | upstream_gene_variant MODIFIER | c.-4359G>C  | 3912 |
| #N/D | #N/D | #N/D | #N/D | #N/D | upstream_gene_variant MODIFIER | c.-3625G>C  | 3522 |
| #N/D | #N/D | #N/D | #N/D | #N/D | upstream_gene_variant MODIFIER | c.-8087A>C  | 3296 |
| #N/D | #N/D | #N/D | #N/D | #N/D | upstream_gene_variant MODIFIER | n.-1868A>C  | 1868 |
| #N/D | #N/D | #N/D | #N/D | #N/D | upstream_gene_variant MODIFIER | n.-2020T>C  | 2020 |
| #N/D | #N/D | #N/D | #N/D | #N/D | upstream_gene_variant MODIFIER | c.-39191A>C | 2049 |
| #N/D | #N/D | #N/D | #N/D | #N/D | upstream_gene_variant MODIFIER | c.-7680T>A  | 4607 |
| #N/D | #N/D | #N/D | #N/D | #N/D | upstream_gene_variant MODIFIER | c.-2932T>A  | 2314 |
| #N/D | #N/D | #N/D | #N/D | #N/D | upstream_gene_variant MODIFIER | c.-3621T>C  | 2553 |
| #N/D | #N/D | #N/D | #N/D | #N/D | upstream_gene_variant MODIFIER | c.-3745A>G  | 2677 |
| #N/D | #N/D | #N/D | #N/D | #N/D | upstream_gene_variant MODIFIER | c.-4371A>G  | 3303 |
| #N/D | #N/D | #N/D | #N/D | #N/D | upstream_gene_variant MODIFIER | c.-5515G>C  | 4447 |
| #N/D | #N/D | #N/D | #N/D | #N/D | upstream_gene_variant MODIFIER | c.-28815A>G | 543  |
| #N/D | #N/D | #N/D | #N/D | #N/D | upstream_gene_variant MODIFIER | c.-5967T>C  | 3698 |
| #N/D | #N/D | #N/D | #N/D | #N/D | upstream_gene_variant MODIFIER | c.-16669A>G | 299  |
| #N/D | #N/D | #N/D | #N/D | #N/D | upstream_gene_variant MODIFIER | n.-2863A>G  | 212  |
| #N/D | #N/D | #N/D | #N/D | #N/D | upstream_gene_variant MODIFIER | c.-4548T>C  | 4434 |
| #N/D | #N/D | #N/D | #N/D | #N/D | upstream_gene_variant MODIFIER | c.-9750A>T  | 1279 |
| #N/D | #N/D | #N/D | #N/D | #N/D | upstream_gene_variant MODIFIER | c.-4933T>C  | 2799 |
| #N/D | #N/D | #N/D | #N/D | #N/D | upstream_gene_variant MODIFIER | c.-4457T>C  | 4441 |
| #N/D | #N/D | #N/D | #N/D | #N/D | upstream_gene_variant MODIFIER | c.-2976A>G  | 1050 |
| #N/D | #N/D | #N/D | #N/D | #N/D | upstream_gene_variant MODIFIER | n.-4970A>G  | 4970 |
| #N/D | #N/D | #N/D | #N/D | #N/D | upstream_gene_variant MODIFIER | c.-11719A>G | 3374 |
| #N/D | #N/D | #N/D | #N/D | #N/D | upstream_gene_variant MODIFIER | c.-5827A>G  | 3667 |
| #N/D | #N/D | #N/D | #N/D | #N/D | upstream_gene_variant MODIFIER | c.-5070T>C  | 2643 |
| #N/D | #N/D | #N/D | #N/D | #N/D | upstream_gene_variant MODIFIER | n.-801T>C   | 801  |
| #N/D | #N/D | #N/D | #N/D | #N/D | upstream_gene_variant MODIFIER | c.-6834T>C  | 3038 |
| #N/D | #N/D | #N/D | #N/D | #N/D | upstream_gene_variant MODIFIER | c.-5289G>C  | 3020 |
| #N/D | #N/D | #N/D | #N/D | #N/D | upstream_gene_variant MODIFIER | c.-1063T>C  | 709  |

|      |      |      |      |      |                                |             |      |
|------|------|------|------|------|--------------------------------|-------------|------|
| #N/D | #N/D | #N/D | #N/D | #N/D | upstream_gene_variant MODIFIER | n.-2460A>G  | 2460 |
| #N/D | #N/D | #N/D | #N/D | #N/D | upstream_gene_variant MODIFIER | c.-3354A>G  | 392  |
| #N/D | #N/D | #N/D | #N/D | #N/D | upstream_gene_variant MODIFIER | c.-6138A>T  | 3176 |
| #N/D | #N/D | #N/D | #N/D | #N/D | upstream_gene_variant MODIFIER | c.-10723T>C | 1987 |
| #N/D | #N/D | #N/D | #N/D | #N/D | upstream_gene_variant MODIFIER | c.-1363T>G  | 1363 |
| #N/D | #N/D | #N/D | #N/D | #N/D | upstream_gene_variant MODIFIER | c.-947T>G   | 616  |
| #N/D | #N/D | #N/D | #N/D | #N/D | upstream_gene_variant MODIFIER | c.-22445C>G | 635  |
| #N/D | #N/D | #N/D | #N/D | #N/D | upstream_gene_variant MODIFIER | c.-25793A>G | 4566 |
| #N/D | #N/D | #N/D | #N/D | #N/D | upstream_gene_variant MODIFIER | c.-644A>G   | 526  |
| #N/D | #N/D | #N/D | #N/D | #N/D | upstream_gene_variant MODIFIER | c.-3797A>C  | 2012 |
| #N/D | #N/D | #N/D | #N/D | #N/D | upstream_gene_variant MODIFIER | c.-10795T>C | 1609 |
| #N/D | #N/D | #N/D | #N/D | #N/D | upstream_gene_variant MODIFIER | c.-12101A>G | 2478 |
| #N/D | #N/D | #N/D | #N/D | #N/D | upstream_gene_variant MODIFIER | c.-4891T>C  | 4238 |
| #N/D | #N/D | #N/D | #N/D | #N/D | upstream_gene_variant MODIFIER | c.-8497T>C  | 4207 |
| #N/D | #N/D | #N/D | #N/D | #N/D | upstream_gene_variant MODIFIER | c.-4342A>C  | 4342 |
| #N/D | #N/D | #N/D | #N/D | #N/D | upstream_gene_variant MODIFIER | n.-4096T>G  | 4096 |
| #N/D | #N/D | #N/D | #N/D | #N/D | upstream_gene_variant MODIFIER | c.-8350C>G  | 39   |
| #N/D | #N/D | #N/D | #N/D | #N/D | upstream_gene_variant MODIFIER | c.-58717A>T | 3997 |
| #N/D | #N/D | #N/D | #N/D | #N/D | upstream_gene_variant MODIFIER | c.-9578A>G  | 2797 |
| #N/D | #N/D | #N/D | #N/D | #N/D | upstream_gene_variant MODIFIER | c.-16018A>C | 4736 |
| #N/D | #N/D | #N/D | #N/D | #N/D | upstream_gene_variant MODIFIER | c.-20824T>C | 4482 |
| #N/D | #N/D | #N/D | #N/D | #N/D | upstream_gene_variant MODIFIER | c.-1452A>C  | 1256 |
| #N/D | #N/D | #N/D | #N/D | #N/D | upstream_gene_variant MODIFIER | n.-796T>C   | 796  |
| #N/D | #N/D | #N/D | #N/D | #N/D | upstream_gene_variant MODIFIER | c.-58528T>C | 2573 |
| #N/D | #N/D | #N/D | #N/D | #N/D | upstream_gene_variant MODIFIER | c.-2913T>C  | 1093 |
| #N/D | #N/D | #N/D | #N/D | #N/D | upstream_gene_variant MODIFIER | c.-1511T>C  | 1437 |
| #N/D | #N/D | #N/D | #N/D | #N/D | upstream_gene_variant MODIFIER | c.-4392C>G  | 3448 |
| #N/D | #N/D | #N/D | #N/D | #N/D | upstream_gene_variant MODIFIER | c.-4239A>G  | 2201 |
| #N/D | #N/D | #N/D | #N/D | #N/D | upstream_gene_variant MODIFIER | n.-1600A>G  | 1600 |
| #N/D | #N/D | #N/D | #N/D | #N/D | upstream_gene_variant MODIFIER | c.-5404T>C  | 4996 |
| #N/D | #N/D | #N/D | #N/D | #N/D | upstream_gene_variant MODIFIER | c.-3340T>G  | 3308 |
| #N/D | #N/D | #N/D | #N/D | #N/D | upstream_gene_variant MODIFIER | n.-3447T>G  | 3447 |
| #N/D | #N/D | #N/D | #N/D | #N/D | upstream_gene_variant MODIFIER | c.-5054T>C  | 3923 |
| #N/D | #N/D | #N/D | #N/D | #N/D | upstream_gene_variant MODIFIER | c.-8118A>G  | 2920 |
| #N/D | #N/D | #N/D | #N/D | #N/D | upstream_gene_variant MODIFIER | c.-2585T>C  | 2548 |
| #N/D | #N/D | #N/D | #N/D | #N/D | upstream_gene_variant MODIFIER | c.-4014A>C  | 1913 |

|      |      |      |      |      |                                |             |      |
|------|------|------|------|------|--------------------------------|-------------|------|
| #N/D | #N/D | #N/D | #N/D | #N/D | upstream_gene_variant MODIFIER | c.-5401T>G  | 4348 |
| #N/D | #N/D | #N/D | #N/D | #N/D | upstream_gene_variant MODIFIER | c.-33328T>G | 4109 |
| #N/D | #N/D | #N/D | #N/D | #N/D | upstream_gene_variant MODIFIER | c.-11049T>C | 3183 |
| #N/D | #N/D | #N/D | #N/D | #N/D | upstream_gene_variant MODIFIER | c.-18048A>T | 2605 |
| #N/D | #N/D | #N/D | #N/D | #N/D | upstream_gene_variant MODIFIER | c.-9085A>G  | 458  |
| #N/D | #N/D | #N/D | #N/D | #N/D | upstream_gene_variant MODIFIER | n.-57A>G    | 57   |
| #N/D | #N/D | #N/D | #N/D | #N/D | upstream_gene_variant MODIFIER | c.-4425T>C  | 2101 |
| #N/D | #N/D | #N/D | #N/D | #N/D | upstream_gene_variant MODIFIER | c.-57064T>C | 179  |
| #N/D | #N/D | #N/D | #N/D | #N/D | upstream_gene_variant MODIFIER | c.-58910A>G | 2025 |
| #N/D | #N/D | #N/D | #N/D | #N/D | upstream_gene_variant MODIFIER | c.-59257A>G | 2372 |
| #N/D | #N/D | #N/D | #N/D | #N/D | upstream_gene_variant MODIFIER | c.-61733T>G | 4848 |
| #N/D | #N/D | #N/D | #N/D | #N/D | upstream_gene_variant MODIFIER | c.-4874A>G  | 4790 |
| #N/D | #N/D | #N/D | #N/D | #N/D | upstream_gene_variant MODIFIER | c.-3409T>C  | 1048 |
| #N/D | #N/D | #N/D | #N/D | #N/D | upstream_gene_variant MODIFIER | c.-2277A>G  | 2277 |
| #N/D | #N/D | #N/D | #N/D | #N/D | upstream_gene_variant MODIFIER | c.-13704A>C | 2076 |
| #N/D | #N/D | #N/D | #N/D | #N/D | upstream_gene_variant MODIFIER | c.-19192T>C | 1045 |
| #N/D | #N/D | #N/D | #N/D | #N/D | upstream_gene_variant MODIFIER | c.-1207A>G  | 1130 |
| #N/D | #N/D | #N/D | #N/D | #N/D | upstream_gene_variant MODIFIER | c.-5007T>C  | 4968 |
| #N/D | #N/D | #N/D | #N/D | #N/D | upstream_gene_variant MODIFIER | c.-3051T>C  | 2073 |
| #N/D | #N/D | #N/D | #N/D | #N/D | upstream_gene_variant MODIFIER | c.-3223T>C  | 3190 |
| #N/D | #N/D | #N/D | #N/D | #N/D | upstream_gene_variant MODIFIER | c.-3112T>C  | 863  |
| #N/D | #N/D | #N/D | #N/D | #N/D | upstream_gene_variant MODIFIER | c.-1405A>G  | 1266 |
| #N/D | #N/D | #N/D | #N/D | #N/D | upstream_gene_variant MODIFIER | c.-4777A>G  | 1311 |
| #N/D | #N/D | #N/D | #N/D | #N/D | upstream_gene_variant MODIFIER | c.-8515A>G  | 3512 |
| #N/D | #N/D | #N/D | #N/D | #N/D | upstream_gene_variant MODIFIER | c.-3287A>G  | 3287 |
| #N/D | #N/D | #N/D | #N/D | #N/D | upstream_gene_variant MODIFIER | c.-3153T>C  | 2827 |
| #N/D | #N/D | #N/D | #N/D | #N/D | upstream_gene_variant MODIFIER | c.-4259A>G  | 4127 |
| #N/D | #N/D | #N/D | #N/D | #N/D | upstream_gene_variant MODIFIER | c.-468G>C   | 365  |
| #N/D | #N/D | #N/D | #N/D | #N/D | upstream_gene_variant MODIFIER | c.-5099T>C  | 3466 |
| #N/D | #N/D | #N/D | #N/D | #N/D | upstream_gene_variant MODIFIER | c.-1418T>C  | 1212 |
| #N/D | #N/D | #N/D | #N/D | #N/D | upstream_gene_variant MODIFIER | c.-11747A>T | 2848 |
| #N/D | #N/D | #N/D | #N/D | #N/D | upstream_gene_variant MODIFIER | c.-11381C>G | 4799 |
| #N/D | #N/D | #N/D | #N/D | #N/D | upstream_gene_variant MODIFIER | c.-860T>G   | 860  |
| #N/D | #N/D | #N/D | #N/D | #N/D | upstream_gene_variant MODIFIER | c.-22242A>G | 2314 |
| #N/D | #N/D | #N/D | #N/D | #N/D | upstream_gene_variant MODIFIER | c.-5050T>G  | 3871 |
| #N/D | #N/D | #N/D | #N/D | #N/D | upstream_gene_variant MODIFIER | c.-8464A>G  | 2123 |

|      |      |      |      |      |                                |             |      |
|------|------|------|------|------|--------------------------------|-------------|------|
| #N/D | #N/D | #N/D | #N/D | #N/D | upstream_gene_variant MODIFIER | c.-1635A>T  | 389  |
| #N/D | #N/D | #N/D | #N/D | #N/D | upstream_gene_variant MODIFIER | c.-11754T>C | 4383 |
| #N/D | #N/D | #N/D | #N/D | #N/D | upstream_gene_variant MODIFIER | c.-4277A>G  | 2628 |
| #N/D | #N/D | #N/D | #N/D | #N/D | upstream_gene_variant MODIFIER | c.-10895C>G | 764  |
| #N/D | #N/D | #N/D | #N/D | #N/D | upstream_gene_variant MODIFIER | c.-1562T>C  | 1542 |
| #N/D | #N/D | #N/D | #N/D | #N/D | upstream_gene_variant MODIFIER | c.-5529A>G  | 2158 |
| #N/D | #N/D | #N/D | #N/D | #N/D | upstream_gene_variant MODIFIER | c.-3364A>C  | 2925 |
| #N/D | #N/D | #N/D | #N/D | #N/D | upstream_gene_variant MODIFIER | c.-30036T>C | 1689 |
| #N/D | #N/D | #N/D | #N/D | #N/D | upstream_gene_variant MODIFIER | c.-872A>C   | 797  |
| #N/D | #N/D | #N/D | #N/D | #N/D | upstream_gene_variant MODIFIER | n.-1392A>G  | 1392 |
| #N/D | #N/D | #N/D | #N/D | #N/D | upstream_gene_variant MODIFIER | c.-589A>G   | 513  |
| #N/D | #N/D | #N/D | #N/D | #N/D | upstream_gene_variant MODIFIER | c.-22982T>C | 1708 |
| #N/D | #N/D | #N/D | #N/D | #N/D | upstream_gene_variant MODIFIER | c.-3045A>G  | 2743 |
| #N/D | #N/D | #N/D | #N/D | #N/D | upstream_gene_variant MODIFIER | c.-228T>C   | 228  |
| #N/D | #N/D | #N/D | #N/D | #N/D | upstream_gene_variant MODIFIER | c.-5894T>C  | 1638 |
| #N/D | #N/D | #N/D | #N/D | #N/D | upstream_gene_variant MODIFIER | c.-1424T>A  | 1239 |
| #N/D | #N/D | #N/D | #N/D | #N/D | upstream_gene_variant MODIFIER | c.-8363T>C  | 117  |
| #N/D | #N/D | #N/D | #N/D | #N/D | upstream_gene_variant MODIFIER | n.-2350T>C  | 2350 |
| #N/D | #N/D | #N/D | #N/D | #N/D | upstream_gene_variant MODIFIER | c.-7074T>G  | 309  |
| #N/D | #N/D | #N/D | #N/D | #N/D | upstream_gene_variant MODIFIER | c.-8909A>G  | 2770 |
| #N/D | #N/D | #N/D | #N/D | #N/D | upstream_gene_variant MODIFIER | c.-1285A>G  | 1256 |
| #N/D | #N/D | #N/D | #N/D | #N/D | upstream_gene_variant MODIFIER | c.-3951A>G  | 3935 |
| #N/D | #N/D | #N/D | #N/D | #N/D | upstream_gene_variant MODIFIER | c.-5437A>G  | 1448 |
| #N/D | #N/D | #N/D | #N/D | #N/D | upstream_gene_variant MODIFIER | c.-10502A>G | 2914 |
| #N/D | #N/D | #N/D | #N/D | #N/D | upstream_gene_variant MODIFIER | c.-416T>C   | 304  |
| #N/D | #N/D | #N/D | #N/D | #N/D | upstream_gene_variant MODIFIER | c.-24013T>C | 1863 |
| #N/D | #N/D | #N/D | #N/D | #N/D | upstream_gene_variant MODIFIER | n.-1042A>G  | 1042 |
| #N/D | #N/D | #N/D | #N/D | #N/D | upstream_gene_variant MODIFIER | c.-2723G>C  | 2717 |
| #N/D | #N/D | #N/D | #N/D | #N/D | upstream_gene_variant MODIFIER | c.-1357T>C  | 1140 |
| #N/D | #N/D | #N/D | #N/D | #N/D | upstream_gene_variant MODIFIER | c.-1915T>C  | 1718 |
| #N/D | #N/D | #N/D | #N/D | #N/D | upstream_gene_variant MODIFIER | c.-4103G>C  | 3906 |
| #N/D | #N/D | #N/D | #N/D | #N/D | upstream_gene_variant MODIFIER | c.-5164G>C  | 4603 |
| #N/D | #N/D | #N/D | #N/D | #N/D | upstream_gene_variant MODIFIER | c.-14888T>G | 2684 |
| #N/D | #N/D | #N/D | #N/D | #N/D | upstream_gene_variant MODIFIER | c.-5642A>T  | 3818 |
| #N/D | #N/D | #N/D | #N/D | #N/D | upstream_gene_variant MODIFIER | c.-17826A>C | 299  |
| #N/D | #N/D | #N/D | #N/D | #N/D | upstream_gene_variant MODIFIER | c.-12978A>G | 4213 |

|      |      |      |      |      |                                |             |      |
|------|------|------|------|------|--------------------------------|-------------|------|
| #N/D | #N/D | #N/D | #N/D | #N/D | upstream_gene_variant MODIFIER | n.-4058C>G  | 4058 |
| #N/D | #N/D | #N/D | #N/D | #N/D | upstream_gene_variant MODIFIER | c.-5897T>C  | 4937 |
| #N/D | #N/D | #N/D | #N/D | #N/D | upstream_gene_variant MODIFIER | c.-4031A>C  | 4031 |
| #N/D | #N/D | #N/D | #N/D | #N/D | upstream_gene_variant MODIFIER | c.-6972A>C  | 2716 |
| #N/D | #N/D | #N/D | #N/D | #N/D | upstream_gene_variant MODIFIER | n.-4772T>C  | 4772 |
| #N/D | #N/D | #N/D | #N/D | #N/D | upstream_gene_variant MODIFIER | c.-6537A>C  | 3155 |
| #N/D | #N/D | #N/D | #N/D | #N/D | upstream_gene_variant MODIFIER | c.-11778A>G | 4941 |
| #N/D | #N/D | #N/D | #N/D | #N/D | upstream_gene_variant MODIFIER | c.-4975A>G  | 4797 |
| #N/D | #N/D | #N/D | #N/D | #N/D | upstream_gene_variant MODIFIER | c.-366A>G   | 366  |
| #N/D | #N/D | #N/D | #N/D | #N/D | upstream_gene_variant MODIFIER | c.-1803T>C  | 1478 |
| #N/D | #N/D | #N/D | #N/D | #N/D | upstream_gene_variant MODIFIER | c.-19093C>G | 4284 |
| #N/D | #N/D | #N/D | #N/D | #N/D | upstream_gene_variant MODIFIER | c.-2198A>G  | 2155 |
| #N/D | #N/D | #N/D | #N/D | #N/D | upstream_gene_variant MODIFIER | c.-3769T>C  | 536  |
| #N/D | #N/D | #N/D | #N/D | #N/D | upstream_gene_variant MODIFIER | c.-2590A>G  | 2286 |
| #N/D | #N/D | #N/D | #N/D | #N/D | upstream_gene_variant MODIFIER | c.-18270A>G | 2993 |
| #N/D | #N/D | #N/D | #N/D | #N/D | upstream_gene_variant MODIFIER | c.-2312T>C  | 2312 |
| #N/D | #N/D | #N/D | #N/D | #N/D | upstream_gene_variant MODIFIER | n.-4368A>C  | 4368 |
| #N/D | #N/D | #N/D | #N/D | #N/D | upstream_gene_variant MODIFIER | c.-3750C>G  | 3037 |
| #N/D | #N/D | #N/D | #N/D | #N/D | upstream_gene_variant MODIFIER | c.-4244G>C  | 4129 |
| #N/D | #N/D | #N/D | #N/D | #N/D | upstream_gene_variant MODIFIER | c.-3731G>C  | 3709 |
| #N/D | #N/D | #N/D | #N/D | #N/D | upstream_gene_variant MODIFIER | c.-8623T>C  | 2787 |
| #N/D | #N/D | #N/D | #N/D | #N/D | upstream_gene_variant MODIFIER | c.-14601C>G | 4854 |
| #N/D | #N/D | #N/D | #N/D | #N/D | upstream_gene_variant MODIFIER | c.-2949G>C  | 2793 |
| #N/D | #N/D | #N/D | #N/D | #N/D | upstream_gene_variant MODIFIER | c.-6291T>C  | 4024 |
| #N/D | #N/D | #N/D | #N/D | #N/D | upstream_gene_variant MODIFIER | c.-4842A>G  | 4744 |
| #N/D | #N/D | #N/D | #N/D | #N/D | upstream_gene_variant MODIFIER | c.-4306T>C  | 4115 |
| #N/D | #N/D | #N/D | #N/D | #N/D | upstream_gene_variant MODIFIER | c.-10203T>C | 3600 |
| #N/D | #N/D | #N/D | #N/D | #N/D | upstream_gene_variant MODIFIER | n.-1081A>G  | 1081 |
| #N/D | #N/D | #N/D | #N/D | #N/D | upstream_gene_variant MODIFIER | c.-3601T>C  | 3516 |
| #N/D | #N/D | #N/D | #N/D | #N/D | upstream_gene_variant MODIFIER | c.-7974C>G  | 1242 |
| #N/D | #N/D | #N/D | #N/D | #N/D | upstream_gene_variant MODIFIER | c.-10790C>G | 3884 |
