# Supplementary material for: Fine scale population structure of Acropora palmata and Acropora cervicornis in the Colombian Caribbean
Source: PubMed Central journal article supplement (PMC9438773; doi:10.7717/peerj.13854), 2022-08-30
Supplement: peerj-10-13854-s012.pdf [file peerj-10-13854-s012.pdf]

| ID    | Affy probe id | STAGdb probe i | chrom          | pos     | Ordered Alleles | pca_pvalue_p1 | pca_qvalue  | PCA_outlier |
|-------|---------------|----------------|----------------|---------|-----------------|---------------|-------------|-------------|
| 1282  | AX-212291561  | AP_var_0202    | NW_015441062.1 | 636634  | C // G          | 3,04E-11      | 4,76E-08    | outlier     |
| 5906  | AX-198060765  | Apop_00661     | NW_015441132.1 | 144090  | T // G          | 4,84E-05      | 0,009461947 | outlier     |
| 7742  | AX-197963721  | Apop_00870     | NW_015441169.1 | 262004  | A // C          | 1,20E-05      | 0,00327725  | outlier     |
| 10420 | AX-198061659  | Apop_01220     | NW_015441250.1 | 386766  | A // T          | 9,52E-07      | 0,000397426 | outlier     |
| 12564 | AX-212313719  | Apop_06222     | NW_015441333.1 | 138182  | A // G          | 1,03E-07      | 5,96E-05    | outlier     |
| 8453  | AX-212311724  | Apop_04238     | NW_015441186.1 | 571998  | T // C          | 4,96E-06      | 0,00165428  | outlier     |
| 954   | AX-212312038  | Apop_04552     | NW_015441059.1 | 2074347 | A // C          | 2,11E-06      | 0,000776727 | outlier     |
| 4854  | AX-197981535  | Apop_02623     | NW_015441112.1 | 689     | T // C          | 1,62E-05      | 0,003752732 | outlier     |
| 15862 | AX-212314078  | Apop_06594     | NW_015441504.1 | 269728  | A // G          | 5,02E-06      | 0,00165428  | outlier     |
| 13311 | AX-212294965  | AP_var_3618    | NW_015441366.1 | 217105  | A // G          | 2,59E-07      | 0,000115623 | outlier     |
| 13314 | AX-212308255  | AP_var_3622    | NW_015441366.1 | 301328  | A // G          | 1,05E-07      | 5,96E-05    | outlier     |
| 8980  | AX-212313712  | Apop_06215     | NW_015441199.1 | 392473  | C // G          | 1,20E-05      | 0,00327725  | outlier     |
| 10417 | AX-212307375  | AP_var_2742    | NW_015441250.1 | 380670  | C // G          | 1,50E-05      | 0,003622678 | outlier     |
| 10308 | AX-198061653  | Apop_01215     | NW_015441248.1 | 82967   | T // C          | 1,08E-06      | 0,000421032 | outlier     |
| 3296  | AX-212312229  | Apop_04743     | NW_015441086.1 | 844810  | A // T          | 2,80E-05      | 0,006041909 | outlier     |
| 17471 | AX-212311897  | Apop_04411     | NW_015441667.1 | 212108  | T // C          | 1,04E-05      | 0,003086096 | outlier     |
| 3232  | AX-212315152  | Apop_07651     | NW_015441084.1 | 481056  | T // G          | 4,08E-08      | 2,84E-05    | outlier     |
| 5704  | AX-197963323  | Apop_00638     | NW_015441128.1 | 646387  | A // G          | 2,42E-05      | 0,005413597 | outlier     |
| 17120 | AX-212309531  | AP_var_4901    | NW_015441631.1 | 152298  | T // C          | 8,01E-06      | 0,002507675 | outlier     |
| 14068 | AX-212298114  | Apop_03914     | NW_015441395.1 | 352472  | A // G          | 1,02E-11      | 2,12E-08    | outlier     |
| 4652  | AX-212292466  | AP_var_1116    | NW_015441106.1 | 262062  | T // C          | 1,67E-08      | 1,31E-05    | outlier     |
| 14072 | AX-212308431  | AP_var_3798    | NW_015441395.1 | 378982  | A // G          | 1,02E-11      | 2,12E-08    | outlier     |
| 13312 | AX-212308253  | AP_var_3620    | NW_015441366.1 | 257443  | T // C          | 1,88E-09      | 1,68E-06    | outlier     |
| 1166  | AX-212312423  | Apop_04938     | NW_015441061.1 | 1159352 | A // G          | 1,56E-07      | 8,12E-05    | outlier     |
| 12378 | AX-212307964  | AP_var_3331    | NW_015441322.1 | 108834  | A // G          | 4,77E-05      | 0,009461947 | outlier     |
| 14071 | AX-212295144  | AP_var_3797    | NW_015441395.1 | 365079  | A // C          | 1,87E-09      | 1,68E-06    | outlier     |
| 1316  | AX-197940800  | Afix_02022     | NW_015441062.1 | 918163  | T // C          | 1,89E-07      | 9,10E-05    | outlier     |
| 12831 | AX-212308167  | AP_var_3534    | NW_015441352.1 | 44330   | A // C          | 3,39E-05      | 0,007084476 | outlier     |
| 14074 | AX-212295147  | AP_var_3800    | NW_015441395.1 | 398611  | C // G          | 8,04E-10      | 1,01E-06    | outlier     |
| 18263 | AX-212309906  | AP_var_5276    | NW_015441820.1 | 18619   | A // T          | 3,14E-13      | 1,97E-09    | outlier     |
| 10309 | AX-212307349  | AP_var_2716    | NW_015441248.1 | 86832   | T // C          | 1,33E-05      | 0,003340638 | outlier     |
| 10311 | AX-212307350  | AP_var_2717    | NW_015441248.1 | 101541  | T // C          | 1,33E-05      | 0,003340638 | outlier     |
| 3131  | AX-212301852  | Apop_07639     | NW_015441082.1 | 1097586 | A // C          | 0,240837903   | 0,761889603 | n.s.        |
| 4839  | AX-212302125  | Apop_07912     | NW_015441110.1 | 343884  | A // G          | 0,241289664   | 0,761889603 | n.s.        |
| 10277 | AX-212300925  | Apop_06728     | NW_015441244.1 | 144431  | A // G          | 0,580531191   | 0,864718735 | n.s.        |
| 12377 | AX-212307963  | AP_var_3330    | NW_015441322.1 | 99775   | A // G          | 0,000704461   | 0,045947476 | n.s.        |
| 17627 | AX-212313350  | Apop_05853     | NW_015441701.1 | 103365  | T // C          | 0,00011925    | 0,019145622 | n.s.        |
| 19525 | AX-212304622  | Apop_10392     | NW_015442478.1 | 31541   | T // C          | 0,534014113   | 0,854986819 | n.s.        |

| OUTFLANK_fst | OUTFLANK_qva | OUTFLANK outli | CDS annotation                                  | Protein accessic mRNA accessior | Adig genome v2 |
|--------------|--------------|----------------|-------------------------------------------------|---------------------------------|----------------|
| 0,418444647  | 0,000189071  | outlier        | A disintegrin and metalloproteinase with throm  | XP_015759874.: XM_015904388     | aug_v2a.16603  |
| 0,166261269  | 0,338652177  | n.s.           |                                                 | #N/D                            | #N/D           |
| 0,187854083  | 0,23753233   | n.s.           |                                                 | #N/D                            | #N/D           |
| 0,221408267  | NA           | NA             |                                                 | #N/D                            | #N/D           |
| 0,261221929  | NA           | NA             |                                                 | #N/D                            | #N/D           |
| 0,284081935  | 0,021720461  | outlier        |                                                 | #N/D                            | #N/D           |
| 0,170036477  | 0,338652177  | n.s.           |                                                 | #N/D                            | #N/D           |
| 0,229780484  | 0,070163694  | n.s.           |                                                 | #N/D                            | #N/D           |
| 0,249473851  | 0,056886971  | n.s.           |                                                 | #N/D                            | #N/D           |
| 0,415342969  | 0,000302536  | outlier        |                                                 | #N/D                            | #N/D           |
| 0,330551407  | 0,004407907  | outlier        | SAFB-like transcription modulator               | XP_015769099.: XM_015913613     | aug_v2a.10066  |
| 0,155852297  | 0,338652177  | n.s.           | ras-associated and pleckstrin homology domains  | XP_015760915.: XM_015905429     | aug_v2a.15306  |
| 0,221408267  | NA           | NA             | uncharacterized LOC107342869                    | XP_015763869.: XM_015908383     | aug_v2a.00275  |
| 0,182723698  | 0,255443476  | n.s.           | tumor necrosis factor receptor superfamily mem  | XP_015763745.: XM_015908259     | aug_v2a.14076  |
| 0,190702638  | 0,111366918  | n.s.           | fibropellin-1-like%2C transcript variant X3     | XP_015751614.: XM_015896128     | aug_v2a.14876  |
| 0,287797709  | 0,021720461  | outlier        | uncharacterized LOC107355283                    | XR_001567007.:                  | #N/D           |
| 0,213176962  | 0,131242883  | n.s.           | cyclic AMP-responsive element-binding protein 3 | XP_015751395.: XM_015895909     | aug_v2a.20705  |
| 0,127370291  | 0,467084743  | n.s.           | zinc finger protein 429-like                    | XP_015755900.: XM_015900414     | aug_v2a.05150  |
| 0,220769492  | 0,080098952  | n.s.           | uncharacterized LOC107354539                    | XP_015776505.: XM_015921019     | aug_v2a.11224  |
| 0,417475142  | 0,000189071  | outlier        | CREB-binding protein-like%2C transcript variant | XP_015770280.: XM_015914794     | aug_v2a.03049  |
| 0,212239652  | 0,139005298  | n.s.           | putative ATP-dependent RNA helicase TDRD9       | XP_015753856.: XM_015898370     | aug_v2a.13797  |
| 0,417475142  | 0,000189071  | outlier        | non-histone protein 10-like isoform X1          | XP_015770286.: XM_015914800     | aug_v2a.03047  |
| 0,443152724  | 0,000189071  | outlier        | beta-1,3-galactosyltransferase 5-like           | XP_015769103.: XM_015913617     | aug_v2a.00094  |
| 0,298870492  | 0,013481792  | outlier        |                                                 | #N/D                            | #N/D           |
| 0,346599869  | 0,002674883  | outlier        |                                                 | #N/D                            | #N/D           |
| 0,417475142  | 0,000189071  | outlier        |                                                 | #N/D                            | #N/D           |
| 0,032442041  | 0,98588884   | n.s.           |                                                 | #N/D                            | #N/D           |
| 0,093753381  | NA           | NA             |                                                 | #N/D                            | #N/D           |
| 0,348348777  | NA           | NA             |                                                 | #N/D                            | #N/D           |
| 0,552571601  | NA           | NA             |                                                 | #N/D                            | #N/D           |
| 0,184537579  | 0,255443476  | n.s.           |                                                 | #N/D                            | #N/D           |
| 0,184537579  | 0,255443476  | n.s.           |                                                 | #N/D                            | #N/D           |
| 0,26063029   | 0,021720461  | outlier        |                                                 | #N/D                            | #N/D           |
| 0,222879293  | 0,044410229  | outlier        |                                                 | #N/D                            | #N/D           |
| 0,228443796  | 0,006891154  | outlier        |                                                 | #N/D                            | #N/D           |
| 0,361077589  | 0,001744204  | outlier        |                                                 | #N/D                            | #N/D           |
| 0,395850323  | 0,000460863  | outlier        |                                                 | #N/D                            | #N/D           |
| 0,228224708  | 0,023050969  | outlier        |                                                 | #N/D                            | #N/D           |

| GO Terms       | KEGG      | SNPeff prediction                      | Putative_impac          | DNA change    | AA change     | cDNA_position ,     |
|----------------|-----------|----------------------------------------|-------------------------|---------------|---------------|---------------------|
| GO:0004222     | GC        | #N/D                                   | 5_prime_UTR_variant     | MODIFIER      | c.-169G>C     |                     |
|                | #N/D      | #N/D                                   | downstream_gene_variant | MODIFIER      | c.*8386T>G    |                     |
|                | #N/D      | #N/D                                   | downstream_gene_variant | MODIFIER      | n.*3504T>G    |                     |
|                | #N/D      | #N/D                                   | downstream_gene_variant | MODIFIER      | c.*2819A>T    |                     |
|                | #N/D      | #N/D                                   | downstream_gene_variant | MODIFIER      | c.*3633A>G    |                     |
|                | #N/D      | #N/D                                   | downstream_gene_variant | MODIFIER      | c.*8627T>C    |                     |
|                | #N/D      | #N/D                                   | intergenic_region       | MODIFIER      | n.2074347A>C  |                     |
|                | #N/D      | #N/D                                   | intergenic_region       | MODIFIER      | n.689T>C      |                     |
|                | #N/D      | #N/D                                   | intergenic_region       | MODIFIER      | n.269728A>G   |                     |
|                | #N/D      | #N/D                                   | intergenic_region       | MODIFIER      | n.217105A>G   |                     |
| GO:0016021; GC | #N/D      | intron_variant                         | MODIFIER                | c.160-1313A>G |               |                     |
| GO:0007165     | K23488    | intron_variant                         | MODIFIER                | c.979-205G>C  |               |                     |
|                | #N/D      | #N/D                                   | synonymous_variant      | LOW           | c.162G>C      | p.Ala54Ala 622/3189 |
| GO:0005576     | K20825    | 3_prime_UTR_variant                    | MODIFIER                | c.*537T>C     |               |                     |
| GO:0005102     | GC        | #N/D                                   | intron_variant          | MODIFIER      | c.*2-8463T>A  |                     |
|                | #N/D      | #N/D                                   | intron_variant          | MODIFIER      | n.336+1030A>G |                     |
| GO:0003677     | GC K09048 | intron_variant                         | MODIFIER                | c.519+33T>G   |               |                     |
| GO:0003676     | GC K09214 | synonymous_variant                     | LOW                     | c.306T>C      | p.Asp102Asp   | 405/5002            |
| GO:0001527     | GC        | #N/D                                   | intron_variant          | MODIFIER      | c.1028-350A>G |                     |
| GO:0000123     | GC K04498 | intron_variant                         | MODIFIER                | c.2661+24A>G  |               |                     |
| GO:0000166     | GC K18408 | missense_variant&splice_region_variant | MODERATE                | c.907A>G      | p.Arg303Gly   | 1014/1994           |
| GO:0000404     | GC K11670 | synonymous_variant                     | LOW                     | c.888T>C      | p.Phe296Phe   | 921/1099            |
| GO:0000139     | GC K02175 | synonymous_variant                     | LOW                     | c.963A>G      | p.Met321Met   | 1182/1464           |
|                | #N/D      | #N/D                                   | upstream_gene_variant   | MODIFIER      | c.-23295A>G   |                     |
|                | #N/D      | #N/D                                   | upstream_gene_variant   | MODIFIER      | n.-4098T>C    |                     |
|                | #N/D      | #N/D                                   | upstream_gene_variant   | MODIFIER      | c.-9636A>C    |                     |
|                | #N/D      | #N/D                                   | upstream_gene_variant   | MODIFIER      | c.-2356A>G    |                     |
|                | #N/D      | #N/D                                   | upstream_gene_variant   | MODIFIER      | c.-2145T>G    |                     |
|                | #N/D      | #N/D                                   | upstream_gene_variant   | MODIFIER      | c.-7761C>G    |                     |
|                | #N/D      | #N/D                                   | upstream_gene_variant   | MODIFIER      | c.-24608A>T   |                     |
|                | #N/D      | #N/D                                   | upstream_gene_variant   | MODIFIER      | c.-8268T>C    |                     |
|                | #N/D      | #N/D                                   | intergenic_region       | MODIFIER      | n.101541T>C   |                     |
|                | #N/D      | #N/D                                   | upstream_gene_variant   | MODIFIER      | c.-10737A>C   |                     |
|                | #N/D      | #N/D                                   | downstream_gene_variant | MODIFIER      | n.*702A>G     |                     |
|                | #N/D      | #N/D                                   | upstream_gene_variant   | MODIFIER      | c.-1625T>C    |                     |
|                | #N/D      | #N/D                                   | upstream_gene_variant   | MODIFIER      | c.-1062T>C    |                     |
|                | #N/D      | #N/D                                   | upstream_gene_variant   | MODIFIER      | n.-3055T>C    |                     |
|                | #N/D      | #N/D                                   | upstream_gene_variant   | MODIFIER      | c.-9379T>C    |                     |

CDS\_position / Protein\_position Distance to feature:

2146

3992

3504

950

1974

3022

162/2118

54/705

537

306/912

102/303

907/1887

303/628

888/918

296/305

963/996

321/331

4892

4098

4279

2332

1920

4535

2053

4394

702

1625

880

3055

1220
